# Supplementary material for: Chemoselective and diastereoselective construction of 4-alkylidene-tetrahydroquinoline via a redox-neutral vinylogous cascade [1,7]-hydride transfer/6-endo-trig cyclization strategy
Source: Royal Society of Chemistry journal article supplement (doi:10.1039/d3ob00223c), 2023-01-01

## Supporting Information

# Chemoselective & Diastereoselective Construction of 4-Alkylidene-tetrahydroquinoline via Redox-Neutral Vinylogous Cascade [1,7]-Hydride Transfer/6-Endo- Trig Cyclization Strategy

Yufeng Wang,<sup>a,s</sup> Qiang Li,<sup>a,s</sup> Xiaopei Song,<sup>a,s</sup> Jing Wang,<sup>a</sup> Xiangcong Yin,<sup>b</sup> Shuai-Shuai Li<sup>\*,a</sup> and Liang Wang<sup>\*,a</sup>

<sup>a</sup>. College of Chemistry and Pharmaceutical Sciences, Qingdao Agricultural University, Qingdao 266109, China

<sup>b</sup>. Hematology Diagnosis Laboratory, The Affiliated Hospital of Qingdao University, Qingdao 266003, China

### Table of Contents

|                                                             |            |
|-------------------------------------------------------------|------------|
| <b>1. General Information.....</b>                          | <b>S2</b>  |
| <b>2. General Procedure.....</b>                            | <b>S2</b>  |
| <b>3. Characterization of Products.....</b>                 | <b>S3</b>  |
| <b>4. Crystal Structures and Data .....</b>                 | <b>S17</b> |
| <b>5. <sup>1</sup>H and <sup>13</sup>C NMR Spectra.....</b> | <b>S19</b> |

## 1. General Information

Unless otherwise noted, all reagents and solvents were purchased from the commercial sources and used as received. Thin layer chromatography (TLC) was used to monitor the reaction on Merck 60 F254 precoated silica gel plate (0.2 mm thickness). TLC spots were visualized by UV-light irradiation on Spectroline Model ENF-24061/F 254 nm. The products were purified by flash column chromatography (200-300 mesh silica gel) eluted with the gradient of petroleum ether and ethyl acetate. Proton nuclear magnetic resonance spectra ( $^1\text{H}$  NMR) were recorded on a Bruker 500 MHz NMR spectrometer ( $\text{CDCl}_3$  or  $\text{DMSO-d}_6$  solvent). The chemical shifts were reported in parts per million (ppm), downfield from  $\text{SiMe}_4$  ( $\delta$  0.0) and relative to the signal of chloroform-d ( $\delta$  7.26, singlet) or dimethyl sulfoxide-d<sub>6</sub> ( $\delta$  2.54, singlet). Multiplicities were afforded as: s (singlet); d (doublet); t (triplet); q (quartet); dd (doublets of doublet) or m (multiplets). The number of protons for a given resonance is indicated by nH. Coupling constants were reported as a *J* value in Hz. Carbon nuclear magnetic resonance spectra ( $^{13}\text{C}$  NMR) was referenced to the appropriate residual solvent peak. High resolution mass spectral analysis (HRMS) was performed on Waters XEVO G2 Q-TOF. All substituted saturated and unsaturated aldehydes were purchased from adamas-beta. The substrates A in the following scheme can be readily accessed via the given references.

## 2. General Procedure

### 2.1 Procedure for the Synthesis of 3

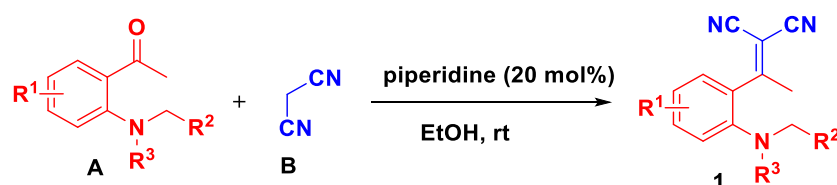

The starting material **1** can be readily accessed as follows according to the references:<sup>1</sup> A reaction tube was charged with 2-(dialkylamino)acetophenone **A** (0.1 mmol), malononitrile **B** (0.15 mmol), piperidine (20 mol%) and EtOH (1.0 mL). The mixture was stirred at room temperature under an atmosphere for 8 h. Upon completion of the reaction as indicated by TLC analysis, the mixture was concentrated in vacuum and the residue was directly purified by flash column chromatography on silica gel (eluent: ethyl acetate/petroleum ether, 1:100) to afford product **1**.

### 2.2 General Procedure for the Synthesis of 3/5

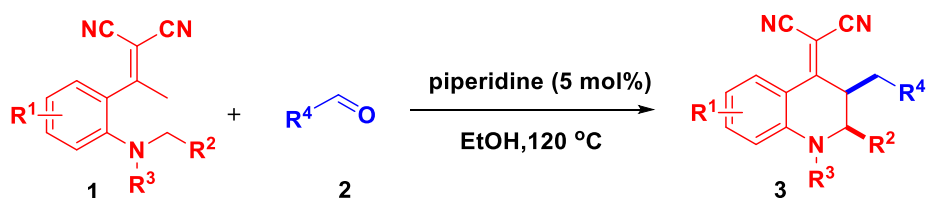

A sealed tube was charged with 2-(1-(2-(amino-1-yl)phenyl)ethylidene)malononitrile **1** (0.1 mmol), aldehyde **2** (0.2 mmol), piperidine (5 mol%) and EtOH (1.0 mL). The mixture was stirred at 120 °C for 24 h. Upon completion of the reaction as indicated by TLC analysis, the mixture was concentrated in vacuum and the residue was directly purified by flash column chromatography on silica gel (eluent: ethyl acetate/petroleum ether, 1:20) to afford product **3**.

### 3. Characterization of Products

#### 2-(4-benzyl-2,3,3a,4-tetrahydropyrrolo[1,2-*a*]quinolin-5(1*H*)-ylidene)malononitrile 3a

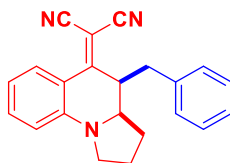

Flash column chromatography on a silica gel (ethyl acetate: petroleum ether, 1:30) afforded the product (20.7 mg, 76% yield) as a red solid, mp: 165-167 °C

**<sup>1</sup>H NMR** (500 MHz, CDCl<sub>3</sub>) δ 7.86 (dd, *J* = 8.2, 0.9 Hz, 1H), 7.41 – 7.37 (m, 1H), 7.25 (d, *J* = 8.6 Hz, 4H), 6.95 – 6.90 (m, 2H), 6.69 (t, *J* = 7.6 Hz, 1H), 6.55 (d, *J* = 8.4 Hz, 1H), 3.82 (s, 1H), 3.50 (d, *J* = 9.2 Hz, 1H), 3.44 – 3.36 (m, 2H), 2.95 (dd, *J* = 13.4, 5.1 Hz, 1H), 2.36 (dd, *J* = 13.4, 10.6 Hz, 1H), 2.24 (dd, *J* = 6.8, 5.3 Hz, 1H), 2.15 (dd, *J* = 12.0, 5.8 Hz, 1H), 2.08 (dd, *J* = 11.0, 6.9 Hz, 1H), 2.02 – 1.93 (m, 1H); **<sup>13</sup>C NMR** (125 MHz, CDCl<sub>3</sub>) δ 170.7, 145.5, 136.6, 136.1, 129.2, 129.2, 128.5, 127.0, 116.0, 114.5, 113.9, 113.0, 112.2, 75.4, 58.9, 46.7, 41.4, 32.8, 27.7, 23.4. **HRMS (ESI)**: calcd. for C<sub>22</sub>H<sub>19</sub>N<sub>3</sub> [M+H]<sup>+</sup>: 326.1652, found: 326.1650.

#### 2-((3*aR*,4*R*)-4-(4-methoxybenzyl)-2,3,3*a*,4-tetrahydropyrrolo[1,2-*a*]quinolin-5(1*H*)-ylidene)malononitrile 3b

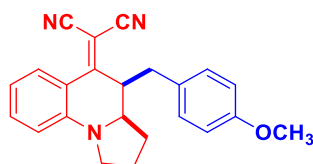

Flash column chromatography on a silica gel (ethyl acetate: petroleum ether, 1:30) afforded the product (23.4 mg, 66% yield) as a red solid, mp: 177-179 °C

**<sup>1</sup>H NMR** (500 MHz, CDCl<sub>3</sub>) δ 7.86 (dd, *J* = 8.2, 1.2 Hz, 1H), 7.43 – 7.37 (m, 1H), 6.84 (d, *J* = 8.7 Hz, 2H), 6.81 – 6.76 (m, 2H), 6.72 – 6.66 (m, 1H), 6.56 (d, *J* = 8.4 Hz, 1H), 3.82 (d, *J* = 3.9 Hz, 1H), 3.81 (s, 3H), 3.52 (dd, *J* = 13.4, 5.5 Hz, 1H), 3.44 – 3.36 (m, 2H), 2.91 (dd, *J* = 13.6, 5.2 Hz, 1H), 2.32 (dd, *J* = 13.6, 10.6 Hz, 1H), 2.29 – 2.21 (m, 1H), 2.20 – 2.12 (m, 1H), 2.11 – 2.04 (m, 1H), 2.03 – 1.93 (m, 1H); **<sup>13</sup>C NMR** (125 MHz, CDCl<sub>3</sub>) δ 170.9, 158.529, 145.519, 136.0, 130.2, 129.2, 128.4, 115.9, 114.5, 113.9, 113.8, 113.0, 112.1, 75.5, 58.8, 55.2, 46.7, 41.5, 31.9, 27.7, 23.4. **HRMS (ESI)**: calcd. for C<sub>23</sub>H<sub>21</sub>N<sub>3</sub>O [M+H]<sup>+</sup>: 356.1757, found: 356.1755.

#### 2-((3*aR*,4*R*)-4-(4-methylbenzyl)-2,3,3*a*,4-tetrahydropyrrolo[1,2-*a*]quinolin-5(1*H*)-ylidene)malononitrile 3c

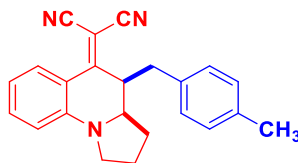

Flash column chromatography on a silica gel (ethyl acetate: petroleum ether, 1:20) afforded the product (25.4 mg, 75% yield) as a red solid, mp: 163-165 °C

**<sup>1</sup>H NMR** (500 MHz, CDCl<sub>3</sub>) δ 7.86 (dd, *J* = 8.2, 1.0 Hz, 1H), 7.44 – 7.37 (m, 1H), 7.06 (d, *J* = 7.8 Hz, 2H), 6.82 (d, *J* = 7.9 Hz, 2H), 6.69 (t, *J* = 7.6 Hz, 1H), 6.56 (d, *J* = 8.4 Hz, 1H), 3.88 – 3.79 (m, 1H), 3.52 (dd, *J* = 13.4, 5.3 Hz, 1H), 3.45 – 3.36 (m, 2H), 2.92 (dd, *J* = 13.4, 5.2 Hz, 1H), 2.37 – 2.29 (m, 4H), 2.28 – 2.21 (m, 1H), 2.19 – 2.12 (m, 1H), 2.12 – 2.03 (m, 1H), 2.03 – 1.94 (m, 1H); **<sup>13</sup>C NMR** (125 MHz,

CDCl<sub>3</sub>)  $\delta$  170.8, 145.5, 136.4, 136.0, 133.36, 129.14, 129.1, 129.0, 115.8, 114.5, 113.9, 112.9, 112.1, 75.4, 58.8, 46.7, 41.4, 32.3, 27.7, 23.4, 21.0. **HRMS (ESI)**: calcd. for C<sub>23</sub>H<sub>21</sub>N<sub>3</sub> [M+H]<sup>+</sup>: 340.1808, found: 340.1808.

**2-((3a*R*,4*R*)-4-(2-fluoro-4-methoxybenzyl)-2,3,3a,4-tetrahydropyrrolo[1,2- $\alpha$ ]quinolin-5(1*H*)-ylidene)malononitrile 3d**

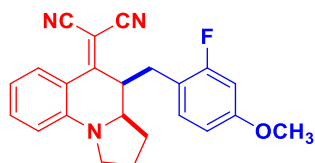

Flash column chromatography on a silica gel (ethyl acetate: petroleum ether, 1:30) afforded the product (28.0 mg, 75% yield) as a red solid, mp: 178-181 °C

**<sup>1</sup>H NMR** (500 MHz, CDCl<sub>3</sub>)  $\delta$  7.92 (d,  $J$  = 8.1 Hz, 1H), 7.40 (t,  $J$  = 7.7 Hz, 1H), 6.69 (t,  $J$  = 7.6 Hz, 1H), 6.66 – 6.59 (m, 2H), 6.58 – 6.53 (m, 2H), 3.85 – 3.81 (m, 1H), 3.80 (d,  $J$  = 5.5 Hz, 3H), 3.51 (t,  $J$  = 8.7 Hz, 1H), 3.42 (dd,  $J$  = 17.1, 9.0 Hz, 2H), 3.02 (dd,  $J$  = 13.7, 4.4 Hz, 1H), 2.28 (dd,  $J$  = 13.3, 10.8 Hz, 2H), 2.19 (dd,  $J$  = 12.2, 5.9 Hz, 1H), 2.13 (dd,  $J$  = 11.1, 7.2 Hz, 1H), 2.05 – 1.94 (m, 1H); **<sup>19</sup>F NMR** (470 MHz, CDCl<sub>3</sub>): -115.06 (s, 1F); **<sup>13</sup>C NMR** (125 MHz, CDCl<sub>3</sub>)  $\delta$  170.4, 161.7 (d,  $J$  = 243.8 Hz), 160.1 (d,  $J$  = 11.3 Hz), 145.6, 136.1, 131.4 (d,  $J$  = 6.3 Hz), 129.2, 116.0, 115.5 (d,  $J$  = 16.3 Hz), 114.5, 113.2 (d,  $J$  = 66.3 Hz), 112.2, 109.8 (d,  $J$  = 1.3 Hz), 101.6, 101.6, 75.2, 58.8, 55.5, 46.7, 40.3, 27.6, 25.5, 23.3. **HRMS (ESI)**: calcd. for C<sub>23</sub>H<sub>20</sub>FN<sub>3</sub>O [M+H]<sup>+</sup>: 374.1663, found: 374.1665.

**2-((3a*R*,4*R*)-4-(4-fluorobenzyl)-2,3,3a,4-tetrahydropyrrolo[1,2- $\alpha$ ]quinolin-5(1*H*)-ylidene)malononitrile 3e**

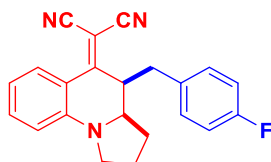

Flash column chromatography on a silica gel (ethyl acetate: petroleum ether, 1:15) afforded the product (29.5mg, 86% yield) as a red solid, mp: 158-163 °C

**<sup>1</sup>H NMR** (500 MHz, CDCl<sub>3</sub>)  $\delta$  7.86 (d,  $J$  = 8.1 Hz, 1H), 7.41 (t,  $J$  = 7.7 Hz, 1H), 6.95 (t,  $J$  = 8.6 Hz, 2H), 6.89 (dd,  $J$  = 8.1, 5.6 Hz, 2H), 6.69 (t,  $J$  = 7.6 Hz, 1H), 6.57 (d,  $J$  = 8.5 Hz, 1H), 3.88 – 3.78 (m, 1H), 3.52 (t,  $J$  = 8.8 Hz, 1H), 3.45 – 3.35 (m, 2H), 2.94 (dd,  $J$  = 13.5, 5.1 Hz, 1H), 2.35 (dd,  $J$  = 13.4, 10.9 Hz, 1H), 2.29 – 2.22 (m, 1H), 2.21 – 2.14 (m, 1H), 2.12 – 2.04 (m, 1H), 2.04 – 1.94 (m, 1H); **<sup>19</sup>F NMR** (470 MHz, CDCl<sub>3</sub>): -115.58 (s, 1F); **<sup>13</sup>C NMR** (125 MHz, CDCl<sub>3</sub>)  $\delta$  170.3, 161.8 (d,  $J$  = 243.7 Hz), 145.5, 136.2, 132.2 (d,  $J$  = 3.75 Hz), 130.7 (d,  $J$  = 7.5 Hz), 129.0, 116.0, 115.3 (d,  $J$  = 21.3 Hz), 114.3, 113.9, 112.8, 112.2, 75.3, 58.7, 46.7, 41.3, 31.9, 27.6, 23.3. **HRMS (ESI)**: calcd. for C<sub>22</sub>H<sub>18</sub>FN<sub>3</sub> [M+H]<sup>+</sup>: 344.1558, found: 344.1557.

**2-((3a*R*,4*R*)-4-(4-chlorobenzyl)-2,3,3a,4-tetrahydropyrrolo[1,2- $\alpha$ ]quinolin-5(1*H*)-ylidene)malononitrile 3f**

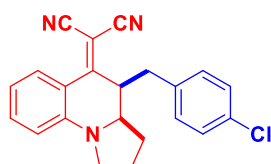

Flash column chromatography on a silica gel (ethyl acetate: petroleum ether, 1:15) afforded the product (30.5mg, 85% yield) as a red solid, mp: 158-161 °C

<sup>1</sup>H NMR (500 MHz, CDCl<sub>3</sub>) δ 7.86 (d, *J* = 8.2 Hz, 1H), 7.41 (t, *J* = 7.8 Hz, 1H), 7.23 (d, *J* = 8.2 Hz, 2H), 6.86 (d, *J* = 8.2 Hz, 2H), 6.70 (t, *J* = 7.6 Hz, 1H), 6.56 (d, *J* = 8.5 Hz, 1H), 3.92 – 3.76 (m, 1H), 3.52 (t, *J* = 8.6 Hz, 1H), 3.47 – 3.35 (m, 2H), 2.93 (dd, *J* = 13.5, 5.2 Hz, 1H), 2.35 (dd, *J* = 13.4, 10.8 Hz, 1H), 2.30 – 2.20 (m, 1H), 2.21 – 2.13 (m, 1H), 2.12 – 2.03 (m, 1H), 2.03 – 1.94 (m, 1H); <sup>13</sup>C NMR (125 MHz, CDCl<sub>3</sub>) δ 170.2, 145.4, 136.2, 135.1, 132.8, 130.5, 129.1, 128.6, 116.1, 114.3, 113.9, 112.8, 112.2, 75.5, 58.8, 46.71, 41.1, 32.1, 27.7, 23.3. **HRMS (ESI):** calcd. for C<sub>22</sub>H<sub>18</sub><sup>35</sup>CIN<sub>3</sub> [M+H]<sup>+</sup>: 360.1262, found: 360.1266; calcd. for C<sub>22</sub>H<sub>18</sub><sup>37</sup>CIN<sub>3</sub> [M+H]<sup>+</sup>: 362.1233, found: 362.1236.

**2-((3*aR*,4*R*)-4-(4-bromobenzyl)-2,3,3*a*,4-tetrahydropyrrolo[1,2-*α*]quinolin-5(1*H*)-ylidene)malononitrile 3g**

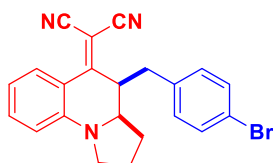

Flash column chromatography on a silica gel (ethyl acetate: petroleum ether, 1:15) afforded the product (32.2mg, 80% yield) as a red solid, mp: 161-163 °C

<sup>1</sup>H NMR (500 MHz, CDCl<sub>3</sub>) δ 7.86 (dd, *J* = 8.2, 1.2 Hz, 1H), 7.44 – 7.40 (m, 1H), 7.40 – 7.36 (m, 2H), 6.81 (d, *J* = 8.3 Hz, 2H), 6.70 (t, *J* = 7.6 Hz, 1H), 6.56 (d, *J* = 8.4 Hz, 1H), 3.88 – 3.81 (m, 1H), 3.53 (dd, *J* = 13.2, 5.7 Hz, 1H), 3.42 (m, 2H), 2.91 (dd, *J* = 13.5, 5.2 Hz, 1H), 2.34 (dd, *J* = 13.5, 10.6 Hz, 1H), 2.26 (m, 1H), 2.21 – 2.15 (m, 1H), 2.11 – 2.03 (m, 1H), 2.03 – 1.95 (m, 1H); <sup>13</sup>C NMR (125 MHz, CDCl<sub>3</sub>) δ 170.2, 145.4, 136.2, 135.6, 131.6, 130.9, 129.1, 121.0, 116.1, 114.3, 113.9, 112.8, 112.2, 75.5, 58.8, 46.7, 41.0, 32.2, 27.7, 23.3. **HRMS (ESI):** calcd. for C<sub>22</sub>H<sub>18</sub><sup>79</sup>BrN<sub>3</sub> [M+H]<sup>+</sup>: 404.0757, found: 404.0761; calcd. for C<sub>22</sub>H<sub>18</sub><sup>81</sup>BrN<sub>3</sub> [M+H]<sup>+</sup>: 406.0737, found: 406.0739.

**2-((3*aR*,4*R*)-4-(2-(trifluoromethyl)benzyl)-2,3,3*a*,4-tetrahydropyrrolo[1,2-*α*]quinolin-5(1*H*)-ylidene)malononitrile 3h**

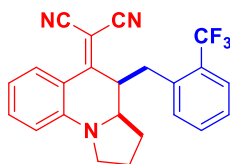

Flash column chromatography on a silica gel (ethyl acetate: petroleum ether, 1:15) afforded the product (31.4 mg, 80% yield) as a red solid, mp: 172-174 °C

<sup>1</sup>H NMR (500 MHz, CDCl<sub>3</sub>) δ 8.10 (d, *J* = 8.1 Hz, 1H), 7.68 (d, *J* = 7.7 Hz, 1H), 7.47 – 7.41 (m, 2H), 7.41 – 7.37 (m, 1H), 6.81 (d, *J* = 7.5 Hz, 1H), 6.76 (t, *J* = 7.6 Hz, 1H), 6.59 (d, *J* = 8.4 Hz, 1H), 3.88 – 3.80 (m, 1H), 3.51 (dd, *J* = 9.3, 7.9 Hz, 1H), 3.48 – 3.42 (m, 1H), 3.42 – 3.37 (m, 1H), 3.34 (d, *J* = 14.0 Hz, 1H), 2.44 – 2.37 (m, 1H), 2.32 – 2.24 (m, 1H), 2.23 – 2.11 (m, 2H), 2.06 – 1.95 (m, 1H); <sup>19</sup>F NMR (470 MHz, CDCl<sub>3</sub>) δ -59.13 (s, 3F); <sup>13</sup>C NMR (125 MHz, CDCl<sub>3</sub>) δ 169.6, 145.7, 136.3, 135.7, 131.7, 131.6, 129.1, 127.4, 126.7, 126.6, 116.3, 114.5, 113.1, 112.9, 112.6, 75.5, 59.0, 53.4, 46.7, 41.4, 29.6, 27.5, 23.2. **HRMS (ESI):** calcd. for C<sub>23</sub>H<sub>18</sub>F<sub>3</sub>N<sub>3</sub> [M+H]<sup>+</sup>: 394.1526, found: 394.1522.

**2-((3*aR*,4*R*)-4-(3-(trifluoromethyl)benzyl)-2,3,3*a*,4-tetrahydropyrrolo[1,2-*α*]quinolin-5(1*H*)-ylidene)malononitrile 3i**

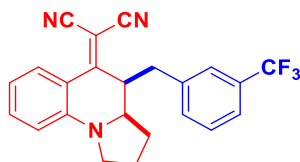

Flash column chromatography on a silica gel (ethyl acetate: petroleum ether, 1:15) afforded the product (32.3mg, 82% yield) as a red solid, mp: 167-170 °C

**<sup>1</sup>H NMR** (500 MHz, CDCl<sub>3</sub>) δ 7.83 (d, *J* = 8.1 Hz, 1H), 7.52 (d, *J* = 7.7 Hz, 1H), 7.47 – 7.37 (m, 2H), 7.20 (d, *J* = 7.6 Hz, 1H), 7.09 (s, 1H), 6.72 (t, *J* = 7.6 Hz, 1H), 6.58 (d, *J* = 8.5 Hz, 1H), 3.92 – 3.80 (m, 1H), 3.54 (t, *J* = 8.6 Hz, 1H), 3.47 – 3.38 (m, 2H), 3.03 (dd, *J* = 13.4, 5.1 Hz, 1H), 2.45 (dd, *J* = 13.2, 11.0 Hz, 1H), 2.32-2.25 (m, 1H), 2.24 – 2.18 (m, 1H), 2.13 – 2.05 (m, 1H), 2.05 – 1.95 (m, 1H); **<sup>19</sup>F NMR** (470 MHz, CDCl<sub>3</sub>): δ -62.70 (s, 3F); **<sup>13</sup>C NMR** (125 MHz, CDCl<sub>3</sub>) δ 169.8, 145.4, 137.5, 136.4, 132.6, 130.6 (d, *J* = 32.5 Hz), 139.0 (d, *J* = 10.0 Hz), 126.1 (q, *J* = 3.8 Hz), 125.0, 123.9 (d, *J* = 3.8 Hz), 122.8, 116.2, 114.1, 113.7, 112.7, 112.3, 75.4, 58.7, 46.7, 40.9, 32.5, 27.7, 23.3. **HRMS (ESI)**: calcd. for C<sub>23</sub>H<sub>18</sub>F<sub>3</sub>N<sub>3</sub> [M+H]<sup>+</sup>: 394.1526, found: 394.1529.

**2-(4-(naphthalen-1-ylmethyl)-2,3,3a,4-tetrahydropyrrolo[1,2-a]quinolin-5(1H)-ylidene)malononitrile 3j**

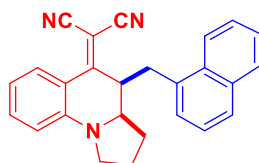

Flash column chromatography on a silica gel (ethyl acetate: petroleum ether, 1:20) afforded the product (27.0 mg, 72% yield) as a red solid, mp: 177-179 °C

**<sup>1</sup>H NMR** (500 MHz, CDCl<sub>3</sub>) δ 7.88 (d, *J* = 7.8 Hz, 1H), 7.83 (d, *J* = 8.0 Hz, 1H), 7.79 (d, *J* = 8.2 Hz, 1H), 7.72 (d, *J* = 8.2 Hz, 1H), 7.53 – 7.40 (m, 3H), 7.35 (t, *J* = 7.6 Hz, 1H), 6.93 (d, *J* = 6.9 Hz, 1H), 6.71 (t, *J* = 7.6 Hz, 1H), 6.63 (d, *J* = 8.4 Hz, 1H), 3.88 (d, *J* = 6.4 Hz, 1H), 3.63 – 3.58 (m, 1H), 3.58 – 3.45 (m, 3H), 2.77 (dd, *J* = 13.4, 11.1 Hz, 1H), 2.35 – 2.22 (m, 3H), 2.04 (dd, *J* = 17.7, 8.8 Hz, 1H); **<sup>13</sup>C NMR** (125 MHz, CDCl<sub>3</sub>) δ 170.4, 145.5, 136.1, 133.8, 132.8, 131.8, 129.5, 129.0, 127.9, 127.5, 126.1, 125.7, 125.1, 122.9, 116.0, 114.4, 113.0, 113.0, 112.3, 75.4, 59.0, 46.7, 40.9, 29.2, 27.8, 23.4. **HRMS (ESI)**: calcd. for C<sub>26</sub>H<sub>21</sub>N<sub>3</sub> [M+H]<sup>+</sup>: 376.1808, found: 376.1805.

**2-((3a*R*,4*R*)-4-(naphthalen-2-ylmethyl)-2,3,3a,4-tetrahydropyrrolo[1,2-a]quinolin-5(1H)-ylidene)malononitrile 3k**

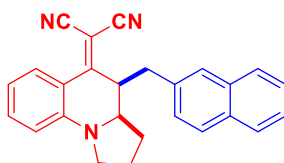

Flash column chromatography on a silica gel (ethyl acetate: petroleum ether, 1:20) afforded the product (29.3 mg, 78% yield) as a red solid, mp: 174-176 °C

**<sup>1</sup>H NMR** (500 MHz, CDCl<sub>3</sub>) δ 7.86 – 7.80 (m, 2H), 7.77 (d, *J* = 8.4 Hz, 1H), 7.70 (dd, *J* = 6.0, 3.4 Hz, 1H), 7.47 (dd, *J* = 6.3, 3.2 Hz, 2H), 7.43 (dd, *J* = 11.3, 4.1 Hz, 1H), 7.30 (s, 1H), 7.15 (dd, *J* = 8.4, 1.5 Hz, 1H), 6.72 (t, *J* = 7.6 Hz, 1H), 6.59 (d, *J* = 8.4 Hz, 1H), 3.91 – 3.83 (m, 1H), 3.60 – 3.60 (m, 1H), 3.53 (d, *J* = 9.2 Hz, 1H), 3.44 (dd, *J* = 17.1, 9.5 Hz, 1H), 3.12 (dd, *J* = 13.5, 5.4 Hz, 1H), 2.55 (dd, *J* = 13.5, 10.4 Hz, 1H), 2.230 – 2.23 (m, 1H), 2.22 – 2.15 (m, 1H), 2.15 – 2.06 (m, 1H), 2.05 – 1.94 (m, 1H); **<sup>13</sup>C**

**NMR** (125 MHz, CDCl<sub>3</sub>)  $\delta$  170.7, 145.5, 136.1, 134.1, 133.2, 132.4, 129.2, 128.2, 127.9, 127.7, 127.5, 127.3, 126.2, 125.7, 116.0, 114.3, 113.8, 113.1, 112.2, 75.5, 58.9, 46.7, 41.1, 33.0, 27.8, 23.4. **HRMS (ESI)**: calcd. for C<sub>26</sub>H<sub>22</sub>N<sub>3</sub> [M+H]<sup>+</sup>: 376.1808, found: 376.1803.

**2-((3*aR*,4*R*)-4-(4-(trifluoromethyl)benzyl)-2,3,3*a*,4-tetrahydropyrrolo[1,2-*a*]quinolin-5(1*H*)-ylidene)malononitrile 3l**

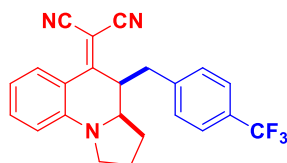

Flash column chromatography on a silica gel (ethyl acetate: petroleum ether, 1:15) afforded the product (35.4 mg, 90% yield) as a red solid, mp: 164-167 °C

**<sup>1</sup>H NMR** (500 MHz, CDCl<sub>3</sub>)  $\delta$  7.87 (d, *J* = 8.2 Hz, 1H), 7.52 (d, *J* = 7.9 Hz, 2H), 7.42 (t, *J* = 7.8 Hz, 1H), 7.06 (d, *J* = 7.9 Hz, 2H), 6.71 (t, *J* = 7.6 Hz, 1H), 6.58 (d, *J* = 8.5 Hz, 1H), 3.85 (dd, *J* = 9.1, 4.4 Hz, 1H), 3.53 (t, *J* = 8.7 Hz, 1H), 3.49 – 3.45 (m, 1H), 3.42 (dd, *J* = 15.8, 7.5 Hz, 1H), 3.02 (dd, *J* = 13.5, 5.1 Hz, 1H), 2.45 (dd, *J* = 13.3, 10.7 Hz, 1H), 2.31 – 2.24 (m, 1H), 2.23 – 2.16 (m, 1H), 2.2 – 2.04 (m, 1H), 2.04 – 1.95 (m, 1H); **<sup>19</sup>F NMR** (470 MHz, CDCl<sub>3</sub>):  $\delta$  -62.34 (s, *J* = 4.7, 3F); **<sup>13</sup>C NMR** (125 MHz, CDCl<sub>3</sub>)  $\delta$  169.9, 145.5, 140.8, 136.3, 129.6, 129.3 (d, *J* = 31.3 Hz), 129.0, 125.3 (q, *J* = 3.8 Hz), 125.2, 123.0, 116.2, 114.0 (d, *J* = 55.0 Hz), 112.7, 112.3, 75.3, 58.8, 46.7, 40.9, 32.6, 27.7, 23.3. **HRMS (ESI)**: calcd. for C<sub>23</sub>H<sub>18</sub>F<sub>3</sub>N<sub>3</sub> [M+H]<sup>+</sup>: 394.1526, found: 394.1529.

**2-((3*aR*,4*R*)-4-(4-nitrobenzyl)-2,3,3*a*,4-tetrahydropyrrolo[1,2-*a*]quinolin-5(1*H*)-ylidene)malononitrile 3m**

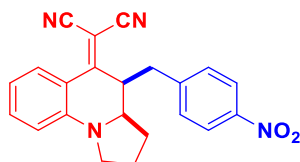

Flash column chromatography on a silica gel (ethyl acetate: petroleum ether, 1:10) afforded the product (31.8 mg, 86% yield) as a red solid, mp: 177-180 °C

**<sup>1</sup>H NMR** (500 MHz, CDCl<sub>3</sub>)  $\delta$  8.10 (d, *J* = 8.5 Hz, 2H), 7.85 (d, *J* = 8.1 Hz, 1H), 7.42 (t, *J* = 7.7 Hz, 1H), 7.10 (d, *J* = 8.5 Hz, 2H), 6.69 (t, *J* = 7.6 Hz, 1H), 6.59 (d, *J* = 8.5 Hz, 1H), 3.90 – 3.81 (m, 1H), 3.53 (t, *J* = 8.6 Hz, 1H), 3.48 – 3.38 (m, 2H), 3.07 (dd, *J* = 13.4, 5.0 Hz, 1H), 2.49 (dd, *J* = 13.2, 10.9 Hz, 1H), 2.31 – 2.40 (m, 1H), 2.21 (dd, *J* = 11.4, 5.5 Hz, 1H), 2.12 – 2.03 (m, 1H), 2.03 – 1.96 (m, 1H); **<sup>13</sup>C NMR** (126 MHz, CDCl<sub>3</sub>)  $\delta$  169.3, 146.9, 145.5, 144.6, 136.4, 130.1, 128.8, 123.5, 116.2, 114.0, 113.7, 112.5, 75.0, 58.7, 46.7, 40.7, 32.5, 27.7, 23.2. **HRMS (ESI)**: calcd. for C<sub>22</sub>H<sub>18</sub>N<sub>4</sub>O<sub>2</sub> [M+H]<sup>+</sup>: 371.1503, found: 371.1505.

**2-((3*aR*,4*R*)-4-(2-nitrobenzyl)-2,3,3*a*,4-tetrahydropyrrolo[1,2-*a*]quinolin-5(1*H*)-ylidene)malononitrile 3n**

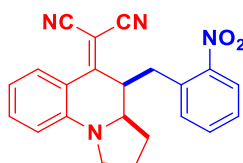

Flash column chromatography on a silica gel (ethyl acetate: petroleum ether, 1:15) afforded the product

(32.6 mg, 88% yield) as a red solid, mp: 182-184 °C

**<sup>1</sup>H NMR** (500 MHz, CDCl<sub>3</sub>) δ 8.11 (dd, *J* = 7.9, 1.5 Hz, 1H), 8.04 (dd, *J* = 8.2, 1.2 Hz, 1H), 7.53 – 7.46 (m, 2H), 7.46 – 7.41 (m, 1H), 6.78 (dd, *J* = 7.3, 1.6 Hz, 1H), 6.74 (t, *J* = 7.6 Hz, 1H), 6.60 (d, *J* = 8.5 Hz, 1H), 3.91 – 3.84 (m, 1H), 3.70 – 3.65 (m, 1H), 3.63 (dd, *J* = 12.9, 3.3 Hz, 1H), 3.55 – 3.49 (m, 1H), 3.9 – 3.42 (m, 1H), 2.41 (dd, *J* = 12.7, 11.3 Hz, 1H), 2.35 – 2.20 (m, 3H), 2.08 – 1.98 (m, 1H); **<sup>13</sup>C NMR** (125 MHz, CDCl<sub>3</sub>) δ 169.4, 149.1, 145.8, 136.4, 133.2, 132.8, 132.8, 129.0, 128.6, 125.8, 116.3, 114.4, 113.2, 112.9, 112.7, 75.1, 59.0, 46.8, 40.3, 30.6, 27.6, 23.2. **HRMS (ESI)**: calcd. for C<sub>22</sub>H<sub>18</sub>N<sub>4</sub>O<sub>2</sub> [M+H]<sup>+</sup>: 371.1503, found: 371.1501.

**2-((3*aR*,4*R*)-8-methoxy-4-(4-(trifluoromethyl)benzyl)-2,3,3*a*,4-tetrahydropyrrolo[1,2-*α*]quinolin-5(1*H*)-ylidene)malononitrile 3o**

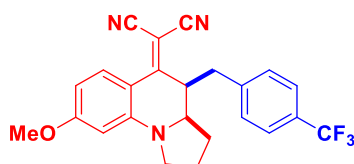

Flash column chromatography on a silica gel (ethyl acetate: petroleum ether, 1:10) afforded the product (33.8 mg, 80% yield) as a red solid, mp: 178-181 °C

**<sup>1</sup>H NMR** (500 MHz, CDCl<sub>3</sub>) δ 7.92 (d, *J* = 9.1 Hz, 1H), 7.51 (d, *J* = 8.0 Hz, 2H), 7.08 (d, *J* = 7.9 Hz, 2H), 6.33 (dd, *J* = 9.1, 2.2 Hz, 1H), 5.95 (d, *J* = 2.1 Hz, 1H), 3.89 (s, 3H), 3.85 – 3.79 (m, 1H), 3.50 (t, *J* = 8.5 Hz, 1H), 3.47 – 3.37 (m, 2H), 2.98 (dd, *J* = 13.5, 5.3 Hz, 1H), 2.45 (dd, *J* = 13.3, 10.2 Hz, 1H), 2.29 – 2.21 (m, 1H), 2.21 – 2.14 (m, 1H), 2.11 – 2.02 (m, 1H), 2.02 – 1.94 (m, 6.6 Hz, 1H); **<sup>19</sup>F NMR** (470 MHz, CDCl<sub>3</sub>): δ -62.34 (s, 3F); **<sup>13</sup>C NMR** (125 MHz, CDCl<sub>3</sub>) δ 168.4, 166.3, 147.6, 140.9, 131.1, 129.7, 129.3, 129.1, 125.3 (q, *J* = 3.8 Hz), 115.1, 114.6, 107.3, 105.0, 95.3, 71.6, 58.8, 55.5, 46.9, 41.1, 32.8, 27.8, 23.2. **HRMS (ESI)**: calcd. for C<sub>24</sub>H<sub>20</sub>F<sub>3</sub>N<sub>3</sub>O [M+H]<sup>+</sup>: 424.1631, found: 424.1631.

**2-((3*aR*,4*R*)-8-methoxy-4-(4-nitrobenzyl)-2,3,3*a*,4-tetrahydropyrrolo[1,2-*α*]quinolin-5(1*H*)-ylidene)malononitrile 3p**

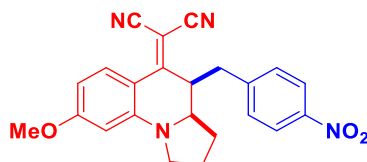

Flash column chromatography on a silica gel (ethyl acetate: petroleum ether, 1:3) afforded the product (34.0 mg, 85% yield) as a yellow solid, mp: 175-178 °C

**<sup>1</sup>H NMR** (500 MHz, CDCl<sub>3</sub>) δ 8.12 (d, *J* = 8.4 Hz, 2H), 7.91 (d, *J* = 9.1 Hz, 1H), 7.12 (d, *J* = 8.4 Hz, 2H), 6.34 (dd, *J* = 9.1, 1.9 Hz, 1H), 5.97 (d, *J* = 1.7 Hz, 1H), 3.89 (s, 3H), 3.86 – 3.78 (m, 1H), 3.52 (t, *J* = 9.1 Hz, 1H), 3.47 – 3.36 (m, 2H), 3.03 (dd, *J* = 13.3, 5.2 Hz, 1H), 2.50 (dd, *J* = 13.0, 10.7 Hz, 1H), 2.26 (d, *J* = 6.1 Hz, 1H), 2.21 (dd, *J* = 11.6, 6.0 Hz, 1H), 2.09 – 1.96 (m, 2H); **<sup>13</sup>C NMR** (125 MHz, CDCl<sub>3</sub>) δ 167.8, 166.4, 147.6, 147.0, 144.6, 131.0, 130.2, 123.6, 114.9, 114.6, 107.1, 105.2, 95.3, 71.6, 58.8, 55.5, 46.9, 41.0, 32.8, 27.9, 23.2. **HRMS (ESI)**: calcd. for C<sub>23</sub>H<sub>20</sub>N<sub>4</sub>O<sub>3</sub> [M+H]<sup>+</sup>: 401.1608, found: 401.1606.

**2-((3*aR*,4*R*)-4-benzyl-7-fluoro-2,3,3*a*,4-tetrahydropyrrolo[1,2-*α*]quinolin-5(1*H*)-ylidene)malononitrile 3q**



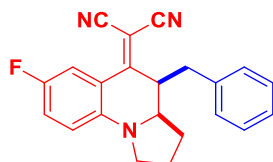

Flash column chromatography on a silica gel (ethyl acetate: petroleum ether, 1:30) afforded the product (**30.2 mg, 88% yield**) as a red solid, mp: 157-159 °C

**<sup>1</sup>H NMR** (500 MHz, CDCl<sub>3</sub>) δ 7.64 (dd, *J* = 9.8, 2.7 Hz, 1H), 7.31 – 7.28 (m, 1H), 7.28 – 7.23 (m, 2H), 7.23 – 7.16 (m, 1H), 7.00 – 6.88 (m, 2H), 6.53 (dd, *J* = 9.2, 4.5 Hz, 1H), 3.81 (dd, *J* = 8.6, 4.9 Hz, 1H), 3.50 (t, *J* = 9.1 Hz, 1H), 3.47 – 3.38 (m, 2H), 2.98 (dd, *J* = 13.4, 5.1 Hz, 1H), 2.36 (dd, *J* = 13.2, 10.8 Hz, 1H), 2.30 – 2.23 (m, 1H), 2.22 – 2.15 (m, 1H), 2.15 – 2.04 (m, 1H), 2.05 – 1.94 (m, 1H); **<sup>19</sup>F NMR** (470 MHz, CDCl<sub>3</sub>): δ -127.29 (s, 1F); **<sup>13</sup>C NMR** (125 MHz, CDCl<sub>3</sub>) δ 169.3, 153.7 (d, *J* = 235 Hz), 142.6, 136.4, 129.2, 128.5, 127.1, 124.1 (d, *J* = 22.5 Hz), 113.9 (d, *J* = 66.3 Hz), 113.7 (d, *J* = 58.8 Hz), 113.6 (d, *J* = 58.8 Hz), 112.3 (d, *J* = 7.5 Hz), 76.4, 58.9, 47.0, 41.5, 32.8, 27.7, 23.3. **HRMS (ESI)**: calcd. for C<sub>22</sub>H<sub>18</sub>FN<sub>3</sub> [M+H]<sup>+</sup>: 344.1558, found: 344.1561.

**2-((3aR,4R)-6-fluoro-4-(4-(trifluoromethyl)benzyl)-2,3,3a,4-tetrahydropyrrolo[1,2-*α*]quinolin-5(1H)-ylidene)malononitrile 3r**

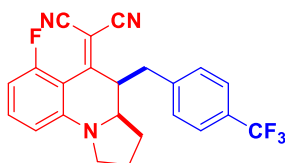

Flash column chromatography on a silica gel (ethyl acetate: petroleum ether, 1:30) afforded the product (32.9 mg, 80% yield) as a red solid, mp: 166-169 °C

**<sup>1</sup>H NMR** (500 MHz, CDCl<sub>3</sub>) δ 7.53 (d, *J* = 8.0 Hz, 2H), 7.35 (dd, *J* = 14.5, 8.2 Hz, 1H), 7.04 (d, *J* = 7.9 Hz, 2H), 6.44 (dd, *J* = 10.6, 8.3 Hz, 1H), 6.32 (d, *J* = 8.5 Hz, 1H), 3.94 – 3.88 (m, 1H), 3.57 – 3.49 (m, 2H), 3.34 (dd, *J* = 17.1, 9.5 Hz, 1H), 3.01 (dd, *J* = 13.4, 4.8 Hz, 1H), 2.42 – 2.35 (m, 1H), 2.33 – 2.21 (m, 2H), 2.06 (dd, *J* = 20.5, 9.7 Hz, 2H); **<sup>19</sup>F NMR** (470 MHz, CDCl<sub>3</sub>): δ -62.36 (s, 3F); -101.23 (s, 1F); **<sup>13</sup>C NMR** (125 MHz, CDCl<sub>3</sub>) δ 166.1 (d, *J* = 2.5 Hz), 160.8 (d, *J* = 255.0 Hz), 145.9 (d, *J* = 5.0 Hz), 140.5, 136.1 (d, *J* = 11.3 Hz), 129.1, 125.4 (q, *J* = 6.3 Hz), 125.0, 122.9, 112.8, 112.5 (d, *J* = 2.5 Hz), 106.9 (d, *J* = 2.5 Hz), 102.9 (d, *J* = 22.5 Hz), 102.3 (d, *J* = 16.3 Hz), 81.6 (d, *J* = 3.8 Hz), 59.4, 46.9, 40.6, 32.5, 27.8, 23.5. **HRMS (ESI)**: calcd. for C<sub>23</sub>H<sub>17</sub>F<sub>4</sub>N<sub>3</sub> [M+H]<sup>+</sup>: 412.1431, found: 412.1433.

**2-((3aR,4R)-4-benzyl-7-bromo-2,3,3a,4-tetrahydropyrrolo[1,2-*α*]quinolin-5(1H)-ylidene)malononitrile 3s**

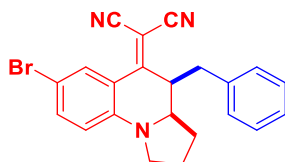

Flash column chromatography on a silica gel (ethyl acetate: petroleum ether, 1:20) afforded the product (32.6 mg, 81% yield) as a red solid, mp: 182-184 °C

**<sup>1</sup>H NMR** (500 MHz, CDCl<sub>3</sub>) δ 7.88 (d, *J* = 1.7 Hz, 1H), 7.38 (dd, *J* = 8.9, 1.8 Hz, 1H), 7.19 (dd, *J* = 8.9, 5.7 Hz, 3H), 6.86 (d, *J* = 7.3 Hz, 2H), 6.39 (d, *J* = 9.0 Hz, 1H), 3.81 – 3.66 (m, 1H), 3.42 (t, *J* = 9.1 Hz, 1H), 3.38 – 3.33 (m, 1H), 3.32 – 3.26 (m, 1H), 2.89 (dd, *J* = 13.5, 5.0 Hz, 1H), 2.24 (dd, *J* = 13.3, 10.8 Hz, 1H), 2.21 – 2.15 (m, 1H), 2.14 – 2.07 (m, 1H), 2.06 – 1.98 (m, 1H), 1.98 – 1.88 (m, 1H); **<sup>13</sup>C NMR**

(125 MHz, CDCl<sub>3</sub>)  $\delta$  168.8, 144.3, 138.4, 136.3, 130.8, 129.1, 128.6, 127.2, 114.2, 113.9, 113.72, 113.3, 107.6, 58.9, 46.9, 41.2, 32.8, 27.7, 23.4. **HRMS (ESI)**: calcd. for C<sub>22</sub>H<sub>18</sub><sup>79</sup>BrN<sub>3</sub> [M+H]<sup>+</sup>: 404.0757, found: 404.0757; calcd. for C<sub>22</sub>H<sub>18</sub><sup>81</sup>BrN<sub>3</sub> [M+H]<sup>+</sup>: 406.0737, found: 406.0740.

**2-((6*R*,6*aR*,6*bS*)-6-(4-(trifluoromethyl)benzyl)-6*a*,6*b*,7,8,9,10,10*a*,11-octahydroisindolo[2,1- $\alpha$ ]quinolin-5(6*H*)-ylidene)malononitrile 3t**

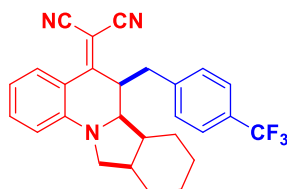

Flash column chromatography on a silica gel (ethyl acetate: petroleum ether, 1:70) afforded the product (35.8 mg, 80% yield) as a red solid, mp: 168-171 °C

**<sup>1</sup>H NMR** (500 MHz, CDCl<sub>3</sub>)  $\delta$  7.84 (d, *J* = 7.9 Hz, 1H), 7.52 (d, *J* = 8.0 Hz, 2H), 7.41 (t, *J* = 7.4 Hz, 1H), 7.05 (d, *J* = 7.9 Hz, 2H), 6.69 (t, *J* = 7.6 Hz, 1H), 6.54 (d, *J* = 8.5 Hz, 1H), 3.94 (dd, *J* = 10.9, 2.8 Hz, 1H), 3.50 (dd, *J* = 9.8, 6.3 Hz, 1H), 3.39 – 3.30 (m, 1H), 3.23 (d, *J* = 9.9 Hz, 1H), 2.94 (dd, *J* = 13.5, 5.4 Hz, 1H), 2.48 (dd, *J* = 10.4, 4.9 Hz, 1H), 2.40 (dd, *J* = 13.5, 10.1 Hz, 2H), 1.83 (d, *J* = 14.0 Hz, 1H), 1.80 – 1.68 (m, 3H), 1.67 – 1.61 (m, 1H), 1.38 – 1.22 (m, 3H); **<sup>19</sup>F NMR** (470 MHz, CDCl<sub>3</sub>):  $\delta$  -62.39 (s, 3F); **<sup>13</sup>C NMR** (125 MHz, CDCl<sub>3</sub>)  $\delta$  169.9, 145.9, 140.8, 136.3, 129.6, 129.3 (d, *J* = 32.5 Hz), 129.1, 125.3 (q, *J* = 3.8 Hz), 124.6 (d, *J* = 270.0 Hz), 116.0, 114.3, 113.7, 112.8, 111.9, 75.2, 57.1, 53.4, 39.2, 37.8, 36.3, 32.8, 28.5, 24.9, 23.4, 20.9. **HRMS (ESI)**: calcd. for C<sub>27</sub>H<sub>24</sub>F<sub>3</sub>N<sub>3</sub> [M+H]<sup>+</sup>: 448.1905, found: 448.1908.

**2-((5*R*)-5-(4-(trifluoromethyl)benzyl)-1,2,3,4,4*a*,5-hexahydro-6*H*-pyrido[1,2- $\alpha$ ]quinolin-6-ylidene)malononitrile 3u**

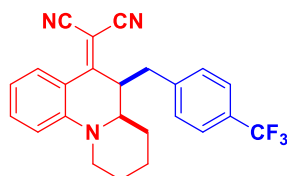

Flash column chromatography on a silica gel (ethyl acetate: petroleum ether, 1:30) afforded the product (29.7 mg, 73% yield) as a red solid, mp: 176-178 °C

**<sup>1</sup>H NMR** (500 MHz, CDCl<sub>3</sub>)  $\delta$  8.08 (dd, *J* = 8.2, 1.1 Hz, 1H), 7.61 (d, *J* = 8.0 Hz, 2H), 7.49 – 7.42 (m, 1H), 7.31 – 7.26 (m, 2H), 6.94 (d, *J* = 8.8 Hz, 1H), 6.78 (t, *J* = 7.6 Hz, 1H), 4.27 (d, *J* = 14.3 Hz, 1H), 3.29 (d, *J* = 12.1 Hz, 1H), 3.20 – 3.13 (m, 1H), 3.11 – 3.02 (m, 1H), 2.89 – 2.78 (m, 2H), 1.88 (d, *J* = 13.1 Hz, 1H), 1.65 – 1.61 (m, 1H), 1.61 – 1.54 (m, 2H), 1.54 – 1.46 (m, 1H), 1.32 (dd, *J* = 12.9, 2.1 Hz, 1H); **<sup>19</sup>F NMR** (470 MHz, CDCl<sub>3</sub>):  $\delta$  -62.38 (s, 3F); **<sup>13</sup>C NMR** (125 MHz, CDCl<sub>3</sub>)  $\delta$  169.0, 145.3, 141.1, 136.6, 129.6, 129.4 (d, *J* = 32.5 Hz), 129.1, 127.3, 125.6 (q, *J* = 3.8 Hz), 125.1, 123.0, 120.8, 117.1, 114.4 (d, *J* = 2.5 Hz), 114.2, 114.0, 74.6, 60.8, 49.8, 46.3, 37.5, 28.3, 24.8, 24.1. **HRMS (ESI)**: calcd. for C<sub>24</sub>H<sub>20</sub>F<sub>3</sub>N<sub>3</sub> [M+H]<sup>+</sup>: 408.1682, found: 408.1680.

**2-((2*S*,3*R*)-1-benzyl-2-phenyl-3-(4-(trifluoromethyl)benzyl)-2,3-dihydroquinolin-4(1*H*)-ylidene)malononitrile 3v**

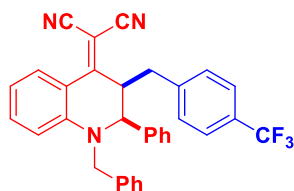

Flash column chromatography on a silica gel (ethyl acetate: petroleum ether, 1:70) afforded the product (38.9 mg, 75% yield) as an orange solid, mp: 156-158 °C

**<sup>1</sup>H NMR** (500 MHz, CDCl<sub>3</sub>) δ 8.03 (dd, *J* = 8.1, 1.2 Hz, 1H), 7.55 – 7.51 (m, 1H), 7.49 (d, *J* = 8.0 Hz, 2H), 7.42 (q, *J* = 5.2 Hz, 3H), 7.37 – 7.32 (m, 3H), 7.31 (dd, *J* = 6.7, 4.9 Hz, 2H), 7.06 – 7.00 (m, 3H), 6.96 (dd, *J* = 6.4, 2.7 Hz, 2H), 6.87 (t, *J* = 7.6 Hz, 1H), 4.98 (d, *J* = 16.9 Hz, 1H), 4.52 (s, 1H), 4.12 (d, *J* = 16.9 Hz, 1H), 3.57 – 3.51 (m, 1H), 2.93 (dd, *J* = 7.4, 2.9 Hz, 2H); **<sup>19</sup>F NMR** (470 MHz, CDCl<sub>3</sub>): δ -62.47 (s, 3F); **<sup>13</sup>C NMR** (125 MHz, CDCl<sub>3</sub>) δ 166.7, 146.3, 140.7, 138.0, 137.1, 136.8, 129.6, 129.4 (d, *J* = 10.0 Hz), 129.1, 128.9, 128.6, 128.1, 127.0, 125.7 (q, *J* = 3.8 Hz), 125.6, 125.1, 122.9, 117.3, 113.8, 113.6, 113.1, 112.1, 76.7, 62.7, 53.2, 48.9, 38.9. **HRMS (ESI)**: calcd. for C<sub>33</sub>H<sub>24</sub>F<sub>3</sub>N<sub>3</sub> [M+H]<sup>+</sup>: 520.1995, found: 520.1995.

**2-((2*S*,3*R*)-1-methyl-2-phenyl-3-(4-(trifluoromethyl)benzyl)-2,3-dihydroquinolin-4(1*H*)-ylidene)malononitrile 3w**

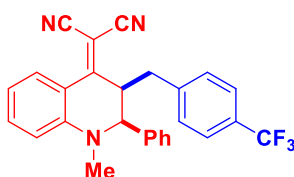

Flash column chromatography on a silica gel (ethyl acetate: petroleum ether, 1:75) afforded the product (30.6 mg, 69% yield) as a yellow solid, mp: 152-155 °C

**<sup>1</sup>H NMR** (500 MHz, CDCl<sub>3</sub>) δ 7.93 (dd, *J* = 8.1, 1.0 Hz, 1H), 7.55 (d, *J* = 8.0 Hz, 2H), 7.49 – 7.44 (m, 1H), 7.24 – 7.17 (m, 5H), 6.81 – 6.76 (m, 3H), 6.74 (t, *J* = 7.6 Hz, 1H), 4.25 (s, 1H), 3.49 – 3.42 (m, 1H), 3.01 (s, 3H), 2.85 (d, *J* = 8.3 Hz, 2H); **<sup>19</sup>F NMR** (470 MHz, CDCl<sub>3</sub>): δ -62.45 (s, 3F); **<sup>13</sup>C NMR** (125 MHz, CDCl<sub>3</sub>) δ 166.8, 146.3, 140.9, 137.5, 136.8, 129.8, 129.5, 129.2, 128.6 (d, *J* = 3.8 Hz), 125.8 (q, *J* = 3.8 Hz), 125.2, 125.1, 122.9, 116.9, 113.9, 113.5, 113.3, 111.8, 76.0, 65.1, 48.2, 38.9, 38.4. **HRMS (ESI)**: calcd. for C<sub>27</sub>H<sub>20</sub>F<sub>3</sub>N<sub>3</sub> [M+H]<sup>+</sup>: 444.1682, found: 444.1684.

**2-((2*R*,3*R*)-3-benzyl-1-ethyl-2-methyl-2,3-dihydroquinolin-4(1*H*)-ylidene)malononitrile 3x**

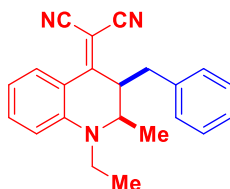

Flash column chromatography on a silica gel (ethyl acetate: petroleum ether, 1:80) afforded the product (21.3 mg, 65% yield) as a red solid, mp: 156-158 °C

**<sup>1</sup>H NMR** (500 MHz, CDCl<sub>3</sub>) δ 8.00 (d, *J* = 8.2 Hz, 1H), 7.32 (t, *J* = 7.8 Hz, 1H), 7.22 (t, *J* = 7.4 Hz, 2H), 7.18 – 7.14 (m, 1H), 7.02 (d, *J* = 7.4 Hz, 2H), 6.60 (dd, *J* = 14.8, 8.1 Hz, 2H), 3.45 (dd, *J* = 14.8, 7.3 Hz, 1H), 3.29 (q, *J* = 6.4 Hz, 1H), 3.21 (dd, *J* = 14.9, 7.3 Hz, 1H), 3.06 (t, *J* = 7.6 Hz, 1H), 2.64 – 2.49 (m, 2H), 1.20 (t, *J* = 7.1 Hz, 3H), 0.95 (d, *J* = 6.6 Hz, 3H); **<sup>13</sup>C NMR** (126 MHz, CDCl<sub>3</sub>) δ 168.2, 144.1,

136.8, 136.5, 129.0, 128.8, 128.6, 1267.0, 115.7, 114.6, 114.1, 112.4, 112.2, 74.24, 54.7, 46.23, 44.33, 38.2, 17.0, 12.7. **HRMS (ESI)**: calcd. for C<sub>22</sub>H<sub>21</sub>N<sub>3</sub> [M+H]<sup>+</sup>: 328.1808, found: 328.1800.

**2-((3a*R*,4*R*)-4-(furan-2-ylmethyl)-2,3,3a,4-tetrahydropyrrolo[1,2-*α*]quinolin-5(1*H*)-ylidene)malononitrile 5a**

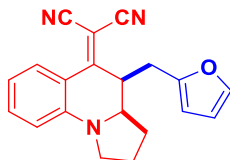

Flash column chromatography on a silica gel (ethyl acetate: petroleum ether, 1:30) afforded the product (19.2 mg, 61% yield) as a red solid, mp: 187-189 °C

**<sup>1</sup>H NMR** (500 MHz, CDCl<sub>3</sub>) δ 7.98 (dd, *J* = 8.2, 1.0 Hz, 1H), 7.41 – 7.36 (m, 1H), 7.35 (d, *J* = 1.1 Hz, 1H), 6.68 (t, *J* = 7.6 Hz, 1H), 6.54 (d, *J* = 8.5 Hz, 1H), 6.27 (dd, *J* = 2.9, 2.0 Hz, 1H), 5.85 (d, *J* = 3.0 Hz, 1H), 3.86 – 3.77 (m, 1H), 3.52 – 3.46 (m, 2H), 3.39 (dd, *J* = 17.0, 9.1 Hz, 1H), 2.95 (dd, *J* = 14.8, 4.8 Hz, 1H), 2.47 (dd, *J* = 14.8, 10.0 Hz, 1H), 2.70 – 2.20 (m, *J* = 13.9, 8.8, 7.0 Hz, 1H), 2.19 – 2.12 (m, 1H), 2.06 – 1.93 (m, 2H); **<sup>13</sup>C NMR** (125 MHz, CDCl<sub>3</sub>) δ 170.1, 150.7, 145.4, 142.0, 136.0, 129.1, 116.0, 114.6, 113.5, 112.7, 112.2, 110.4, 107.5, 75.00, 58.5, 46.6, 39.4, 27.6, 25.1, 23.2. **HRMS (ESI)**: calcd. for C<sub>20</sub>H<sub>17</sub>N<sub>3</sub>O [M+H]<sup>+</sup>: 316.1444, found: 316.1442.

**2-((2*S*,3*R*)-1-benzyl-3-(furan-2-ylmethyl)-2-phenyl-2,3-dihydroquinolin-4(1*H*)-ylidene)malononitrile 5b**

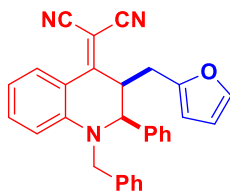

Flash column chromatography on a silica gel (ethyl acetate: petroleum ether, 1:70) afforded the product (24.3 mg, 55% yield) as a yellow solid, mp: 193-196 °C

**<sup>1</sup>H NMR** (500 MHz, CDCl<sub>3</sub>) δ 7.91 (dd, *J* = 8.1, 1.4 Hz, 1H), 7.38 – 7.34 (m, 1H), 7.29 (s, 1H), 7.27 (d, *J* = 1.9 Hz, 2H), 7.27 – 7.23 (m, 4H), 7.18 (d, *J* = 5.7 Hz, 2H), 6.93 (dd, *J* = 7.1, 2.1 Hz, 2H), 6.79 (d, *J* = 8.6 Hz, 1H), 6.73 (t, *J* = 7.6 Hz, 1H), 6.17 (dd, *J* = 3.1, 1.9 Hz, 1H), 5.75 (d, *J* = 3.0 Hz, 1H), 4.79 (d, *J* = 17.0 Hz, 1H), 4.53 (d, *J* = 1.5 Hz, 1H), 4.10 (d, *J* = 17.0 Hz, 1H), 3.60 – 3.54 (m, 1H), 2.93 (dd, *J* = 14.8, 7.2 Hz, 1H), 2.83 (dd, *J* = 14.8, 7.7 Hz, 1H); **<sup>13</sup>C NMR** (125 MHz, CDCl<sub>3</sub>) δ 166.8, 150.2, 146.2, 142.3, 138.2, 136.9, 136.5, 129.3, 129.0, 128.9, 128.5, 127.8, 126.5, 125.7, 117.1, 113.9, 113.6, 112.7, 112.1, 110.4, 107.9, 63.7, 53.6, 46.6, 32.0. **HRMS (ESI)**: calcd. for C<sub>30</sub>H<sub>23</sub>N<sub>3</sub>O [M+H]<sup>+</sup>: 442.1914, found: 442.1911.

**2-((3a*R*,4*R*)-7-fluoro-4-(furan-2-ylmethyl)-2,3,3a,4-tetrahydropyrrolo[1,2-*α*]quinolin-5(1*H*)-ylidene)malononitrile 5c**

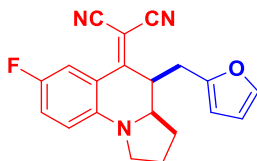

Flash column chromatography on a silica gel (ethyl acetate: petroleum ether, 1:70) afforded the product

(25.6 mg, 77% yield) as a red solid, mp: 183-185 °C

**<sup>1</sup>H NMR** (500 MHz, CDCl<sub>3</sub>) δ 7.74 (dd, *J* = 9.9, 2.8 Hz, 1H), 7.35 (d, *J* = 1.1 Hz, 1H), 7.21 – 7.09 (m, 1H), 6.50 (dd, *J* = 9.2, 4.5 Hz, 1H), 6.27 (dd, *J* = 3.0, 1.9 Hz, 1H), 5.87 (d, *J* = 3.0 Hz, 1H), 3.85 – 3.71 (m, 1H), 3.52 – 3.48 (m, 1H), 3.48 – 3.44 (m, 1H), 3.39 (dd, *J* = 17.0, 8.9 Hz, 1H), 2.96 (dd, *J* = 14.9, 4.8 Hz, 1H), 2.47 (dd, *J* = 14.9, 10.0 Hz, 1H), 2.28 – 2.20 (m, 1H), 2.20 – 2.12 (m, 1H), 2.07 – 2.00 (m, 1H), 2.00 – 1.92 (m, 1H); **<sup>19</sup>F NMR** (470 MHz, CDCl<sub>3</sub>): δ -127.18 (s, 1F); **<sup>13</sup>C NMR** (125 MHz, CDCl<sub>3</sub>) δ 168.76, 153.71(d, *J* = 160.0 Hz), 150.5, 142.6, 142.1, 124.2(d, *J* = 88.8 Hz), 114.0, 113.9, 113.5, 113.2, 112.1, 110.5, 107.7(d, *J* = 5 Hz), 76.0, 58.6, 47.0, 39.5, 27.6, 25.2, 23.2. **HRMS (ESI)**: calcd. for C<sub>20</sub>H<sub>16</sub>FN<sub>3</sub>O [M+H]<sup>+</sup>: 334.1350, found: 334.1345.

**2-((3*aR*,4*R*)-4-(furan-2-ylmethyl)-8-methoxy-2,3,3*a*,4-tetrahydropyrrolo[1,2-*α*]quinolin-5(1*H*)-ylidene)malononitrile 5d**

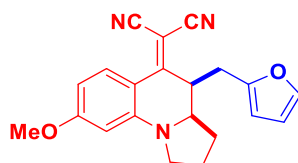

Flash column chromatography on a silica gel (ethyl acetate: petroleum ether, 1:20) afforded the product (21.7 mg, 63% yield) as a yellow solid, mp: 185-187 °C

**<sup>1</sup>H NMR** (500 MHz, CDCl<sub>3</sub>) δ 8.01 (d, *J* = 9.1 Hz, 1H), 7.33 (d, *J* = 0.8 Hz, 1H), 6.32 – 6.22 (m, 2H), 5.92 (d, *J* = 2.2 Hz, 1H), 5.86 (d, *J* = 3.0 Hz, 1H), 3.86 (s, 3H), 3.80 – 3.74 (m, 1H), 3.49 – 3.42 (m, 2H), 3.38 (dd, *J* = 17.0, 8.9 Hz, 1H), 2.92 (dd, *J* = 14.8, 5.0 Hz, 1H), 2.45 (dd, *J* = 14.9, 9.5 Hz, 1H), 2.25 – 2.18 (m, 1H), 2.16 – 2.10 (m, 1H), 2.02 – 1.92 (m, 2H); **<sup>13</sup>C NMR** (125 MHz, CDCl<sub>3</sub>) δ 168.6, 166.1, 150.8, 147.6, 141.9, 131.1, 115.5, 114.2, 110.4, 107.5, 107.2, 104.8, 95.2, 71.2, 58.5, 55.4, 46.8, 39.8, 27.7, 25.4, 23.1. **HRMS (ESI)**: calcd. for C<sub>21</sub>H<sub>19</sub>N<sub>3</sub>O<sub>2</sub> [M+H]<sup>+</sup>: 346.1550, found: 346.1556.

**2-((3*aR*,4*R*)-4-(thiophen-2-ylmethyl)-2,3,3*a*,4-tetrahydropyrrolo[1,2-*α*]quinolin-5(1*H*)-ylidene)malononitrile 5e**

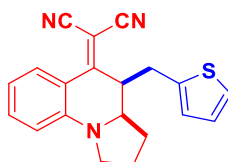

Flash column chromatography on a silica gel (ethyl acetate: petroleum ether, 1:20) afforded the product (21.5 mg, 65% yield) as a red solid, mp: 189-191 °C

**<sup>1</sup>H NMR** (500 MHz, CDCl<sub>3</sub>) δ 7.94 (dd, *J* = 8.2, 1.1 Hz, 1H), 7.44 – 7.36 (m, 1H), 7.16 (dd, *J* = 5.1, 0.9 Hz, 1H), 6.92 (dd, *J* = 5.1, 3.5 Hz, 1H), 6.73 – 6.68 (m, 1H), 6.66 (d, *J* = 3.0 Hz, 1H), 6.55 (d, *J* = 8.4 Hz, 1H), 3.87 – 3.79 (m, 1H), 3.51 (dd, *J* = 13.2, 5.5 Hz, 1H), 3.47 – 3.42 (m, 1H), 3.42 – 3.34 (m, 1H), 3.16 (dd, *J* = 14.6, 5.0 Hz, 1H), 2.65 (dd, *J* = 14.6, 10.3 Hz, 1H), 2.80 – 2.22 (m, 1H), 2.21 – 2.14 (m, 1H), 2.10 – 2.03 (m, 1H), 2.02 – 1.93 (m, 1H); **<sup>13</sup>C NMR** (125 MHz, CDCl<sub>3</sub>) δ 170.3, 145.4, 138.5, 136.1, 129.4, 127.1, 126.5, 124.4, 116.0, 114.4, 113.8, 112.6, 112.2, 75.7, 58.8, 46.6, 41.7, 27.7, 26.6, 23.3. **HRMS (ESI)**: calcd. for C<sub>20</sub>H<sub>17</sub>N<sub>3</sub>S [M+H]<sup>+</sup>: 332.1216, found: 332.1215.

**2-((3*aR*,4*R*)-4-(pyridin-2-ylmethyl)-2,3,3*a*,4-tetrahydropyrrolo[1,2-*α*]quinolin-5(1*H*)-ylidene)malononitrile 5f**

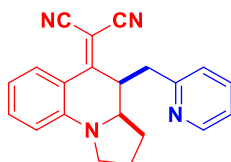

Flash column chromatography on a silica gel (ethyl acetate: petroleum ether, 1:5) afforded the product (28.0 mg, 86% yield) as a red solid, mp: 189-191 °C

<sup>1</sup>H NMR (500 MHz, CDCl<sub>3</sub>) δ 8.63 – 8.47 (m, 1H), 7.93 (dd, *J* = 8.2, 1.2 Hz, 1H), 7.58 – 7.53 (m, 1H), 7.41 – 7.36 (m, 1H), 7.20 – 7.12 (m, 1H), 6.82 (d, *J* = 7.7 Hz, 1H), 6.68 (dd, *J* = 11.3, 3.9 Hz, 1H), 6.54 (d, *J* = 8.5 Hz, 1H), 3.88 – 3.79 (m, 1H), 3.67 – 3.62 (m, 1H), 3.52 – 3.46 (m, 1H), 3.40 (dd, *J* = 17.2, 9.5 Hz, 1H), 3.14 (dd, *J* = 13.4, 4.7 Hz, 1H), 2.54 (dd, *J* = 13.4, 9.9 Hz, 1H), 2.28 – 2.20 (m, 1H), 2.19 – 2.13 (m, 1H), 2.13 – 2.03 (m, 1H), 2.03 – 1.94 (m, 1H); <sup>13</sup>C NMR (125 MHz, CDCl<sub>3</sub>) δ 170.4, 157.3, 149.6, 145.5, 136.3, 136.1, 129.00, 123.4, 121.9, 115.9, 114.6, 113.5, 112.8, 112.3, 74.8, 58.9, 46.6, 40.3, 35.3, 27.8, 23.3. **HRMS (ESI)**: calcd. for C<sub>21</sub>H<sub>18</sub>N<sub>4</sub> [M+H]<sup>+</sup>: 327.1604, found: 327.1607.

**2-((3aR,4R)-4-(pyridin-3-ylmethyl)-2,3,3a,4-tetrahydropyrrolo[1,2-a]quinolin-5(1H)-ylidene)malononitrile 5g**

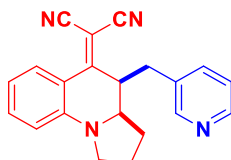

Flash column chromatography on a silica gel (ethyl acetate: petroleum ether, 1:3) afforded the product (27.4 mg, 84% yield) as a red solid, mp: 183-186 °C

<sup>1</sup>H NMR (500 MHz, CDCl<sub>3</sub>) δ 8.53 – 8.44 (m, 1H), 8.07 (d, *J* = 1.5 Hz, 1H), 7.88 (d, *J* = 8.2 Hz, 1H), 7.46 – 7.35 (m, 2H), 7.23 (dd, *J* = 7.7, 4.9 Hz, 1H), 6.70 (t, *J* = 7.6 Hz, 1H), 6.57 (d, *J* = 8.5 Hz, 1H), 3.90 – 3.80 (m, 1H), 3.53 (t, *J* = 8.6 Hz, 1H), 3.47 – 3.35 (m, 2H), 2.95 (dd, *J* = 13.7, 5.1 Hz, 1H), 2.40 (dd, *J* = 13.6, 10.7 Hz, 1H), 2.30 – 2.24 (m, 1H), 2.23 – 2.17 (m, 1H), 2.13 – 2.05 (m, 1H), 2.05 – 1.95 (m, 1H); <sup>13</sup>C NMR (125 MHz, CDCl<sub>3</sub>) δ 169.6, 150.0, 148.4, 145.4, 136.8, 136.4, 132.3, 129.0, 123.3, 116.3, 114.1, 113.8, 112.6, 112.3, 75.2, 58.7, 46.7, 40.8, 29.8, 27.7, 23.3. **HRMS (ESI)**: calcd. for C<sub>21</sub>H<sub>18</sub>N<sub>4</sub> [M+H]<sup>+</sup>: 326.1531, found: 326.1536.

**2-(4-(thiazol-2-ylmethyl)-2,3,3a,4-tetrahydropyrrolo[1,2-a]quinolin-5(1H)-ylidene)malononitrile 5h**

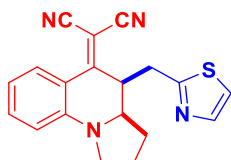

Flash column chromatography on a silica gel (ethyl acetate: petroleum ether, 1:5) afforded the product (26.6 mg, 80% yield) as a red solid, mp: 195-197 °C

<sup>1</sup>H NMR (500 MHz, CDCl<sub>3</sub>) δ 8.01 (d, *J* = 7.5 Hz, 1H), 7.73 (d, *J* = 3.3 Hz, 1H), 7.44 – 7.35 (m, 1H), 7.24 (d, *J* = 3.3 Hz, 1H), 6.71 (t, *J* = 7.6 Hz, 1H), 6.55 (d, *J* = 8.5 Hz, 1H), 3.89 – 3.80 (m, 1H), 3.71 – 3.62 (m, 1H), 3.50 (dd, *J* = 13.2, 5.5 Hz, 1H), 3.45 – 3.34 (m, 2H), 2.83 (dd, *J* = 14.7, 9.3 Hz, 1H), 2.28 – 2.21 (m, 1H), 2.21 – 2.14 (m, 1H), 2.10 – 2.01 (m, 1H), 2.01 – 1.92 (m, 1H); <sup>13</sup>C NMR (125 MHz, CDCl<sub>3</sub>) δ 169.3, 165.4, 145.4, 142.7, 136.3, 129.4, 119.3, 116.3, 114.4, 113.5, 112.6, 112.4, 75.4, 58.9, 46.6, 40.4, 30.1, 27.9, 23.2. **HRMS (ESI)**: calcd. for C<sub>19</sub>H<sub>16</sub>N<sub>4</sub>S [M+H]<sup>+</sup>: 333.1168, found: 333.1171.

**2-((3a*R*,4*R*)-4-(cyclohex-3-en-1-ylmethyl)-2,3,3a,4-tetrahydropyrrolo[1,2-*a*]quinolin-5(1*H*)-ylidene)malononitrile 5i**

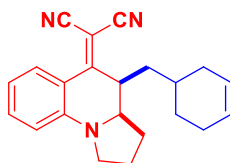

Flash column chromatography on a silica gel (ethyl acetate: petroleum ether, 1:80) afforded the product (15.3 mg, 67% yield) as a red solid, mp: 198-201 °C

**<sup>1</sup>H NMR** (500 MHz, CDCl<sub>3</sub>) δ 7.96 (t, *J* = 8.8 Hz, 1H), 7.35 (t, *J* = 7.7 Hz, 1H), 6.65 (t, *J* = 7.4 Hz, 1H), 6.49 (d, *J* = 8.4 Hz, 1H), 5.61 (d, *J* = 34.7 Hz, 2H), 3.78 (d, *J* = 4.2 Hz, 1H), 3.46 (t, *J* = 8.8 Hz, 1H), 3.32 (dd, *J* = 16.3, 7.8 Hz, 1H), 3.23 – 3.13 (m, 1H), 2.35 (d, *J* = 17.0 Hz, 1H), 2.27 – 1.85 (m, 8H), 1.71 – 1.56 (m, 2H), 1.55 – 1.44 (m, 2H); **<sup>13</sup>C NMR** (125 MHz, CDCl<sub>3</sub>) δ 173.3, 145.5, 136.0, 129.1, 127.0, 125.7, 115.7, 114.7, 114.5, 113.0, 112.0, 74.8, 59.5, 46.7, 37.5, 33.5, 31.8, 31.2, 29.8, 27.8, 24.7, 23.4.

**HRMS (ESI):** calcd. for C<sub>22</sub>H<sub>23</sub>N<sub>3</sub> [M+H]<sup>+</sup>: 330.1965, found: 330.1962.

**Ethyl 2-((3a*R*,4*R*)-5-(dicyanomethylene)-1,2,3,3a,4,5-hexahydropyrrolo[1,2-*a*]quinolin-4-yl)acetate 5j**

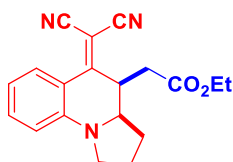

Flash column chromatography on a silica gel (ethyl acetate: petroleum ether, 1:30) afforded the product (16.0 mg, 50% yield) as a red oily.

**<sup>1</sup>H NMR** (500 MHz, CDCl<sub>3</sub>) δ 8.02 (d, *J* = 8.2 Hz, 1H), 7.37 (t, *J* = 7.7 Hz, 1H), 6.68 (t, *J* = 7.6 Hz, 1H), 6.51 (d, *J* = 8.5 Hz, 1H), 4.21 – 4.05 (m, 2H), 3.82 – 3.73 (m, 1H), 3.68 – 3.61 (m, 1H), 3.46 (t, *J* = 9.0 Hz, 1H), 3.35 (dd, *J* = 17.5, 9.3 Hz, 1H), 2.56 (dd, *J* = 16.0, 5.6 Hz, 1H), 2.22 (dd, *J* = 13.1, 6.7 Hz, 1H), 2.18 (d, *J* = 7.6 Hz, 1H), 2.17 – 2.13 (m, 1H), 2.01 – 1.90 (m, 1H), 1.86 – 1.77 (m, 1H), 1.26 (d, *J* = 7.1 Hz, 3H); **<sup>13</sup>C NMR** (125 MHz, CDCl<sub>3</sub>) δ 170.5, 169.8, 145.3, 136.2, 129.1, 116.3, 114.5, 113.9, 112.8, 112.3, 75.3, 61.3, 58.7, 46.6, 36.1, 31.8, 28.0, 23.1, 14.0. **HRMS (ESI):** calcd. for C<sub>19</sub>H<sub>19</sub>N<sub>3</sub>O<sub>2</sub> [M+H]<sup>+</sup>: 322.1550, found: 322.1552.

**2-((3a*R*,4*R*)-4-methyl-2,3,3a,4-tetrahydropyrrolo[1,2-*a*]quinolin-5(1*H*)-ylidene)malononitrile 5k**

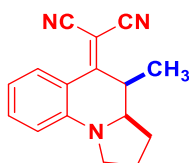

Flash column chromatography on a silica gel (ethyl acetate: petroleum ether, 1:25) afforded the product (13.2 mg, 53% yield) as a red solid, mp: 129-131 °C

**<sup>1</sup>H NMR** (500 MHz, CDCl<sub>3</sub>) δ 8.18 (dd, *J* = 8.3, 0.8 Hz, 1H), 7.42 – 7.31 (m, 1H), 6.65 (t, *J* = 7.6 Hz, 1H), 6.52 (d, *J* = 8.5 Hz, 1H), 3.73 – 3.63 (m, 1H), 3.48 (dd, *J* = 13.2, 5.6 Hz, 1H), 3.38 (dd, *J* = 17.4, 8.9 Hz, 1H), 3.24 – 3.17 (m, 1H), 2.25 – 2.18 (m, 1H), 2.12 – 2.05 (m, 1H), 2.02 – 1.94 (m, 1H), 1.94 – 1.86 (m, 1H), 0.99 (d, *J* = 6.9 Hz, 3H); **<sup>13</sup>C NMR** (125 MHz, CDCl<sub>3</sub>) δ 171.9, 145.9, 136.3, 129.1, 115.9,

115.0, 114.4, 112.6, 112.5, 72.3, 58.2, 46.8, 35.0, 27.5, 23.1, 11.7. **HRMS (ESI)**: calcd. for C<sub>16</sub>H<sub>15</sub>N<sub>3</sub> [M+H]<sup>+</sup>: 250.1339, found: 250.1340.

**2-((2*S*,3*R*)-1-benzyl-3-methyl-2-phenyl-2,3-dihydroquinolin-4(1*H*)-ylidene)malononitrile 5l**

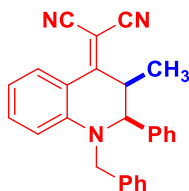

Flash column chromatography on a silica gel (ethyl acetate: petroleum ether, 1:70) afforded the product ((19.2 mg, 51% yield) as a yellow solid, mp: 146-149 °C

**<sup>1</sup>H NMR** (500 MHz, CDCl<sub>3</sub>) δ 7.96 (dd, *J* = 8.1, 1.2 Hz, 1H), 7.33 – 7.29 (m, 1H), 7.28 (d, *J* = 7.0 Hz, 1H), 7.27 – 7.24 (m, 2H), 7.22 (dd, *J* = 12.5, 4.5 Hz, 3H), 7.17 – 7.13 (m, 2H), 6.95 (dd, *J* = 7.0, 2.1 Hz, 2H), 6.74 – 6.63 (m, 2H), 4.75 (d, *J* = 17.1 Hz, 1H), 4.43 (d, *J* = 1.4 Hz, 1H), 4.12 (d, *J* = 17.1 Hz, 1H), 3.35 (dd, *J* = 6.9, 1.8 Hz, 1H), 1.31 (d, *J* = 6.9 Hz, 3H); **<sup>13</sup>C NMR** (125 MHz, CDCl<sub>3</sub>) δ 169.1, 146.2, 138.6, 138.5, 136.9, 136.5, 136.4, 129.2, 129.2, 129.0, 128.9, 128.9, 128.5, 127.7, 126.2, 126.2, 125.6, 116.9, 114.1, 113.7, 113.6, 113.3, 112.1, 112.0, 75.3, 66.3, 53.7, 41.7, 19.7, 19.7. **HRMS (ESI)**: calcd. for C<sub>26</sub>H<sub>21</sub>N<sub>3</sub> [M+H]<sup>+</sup>: 376.1808, found: 376.1813.

**2-((6*R*,6*aR*,6*bS*)-6-methyl-6*a*,6*b*,7,8,9,10,10*a*,11-octahydroisindolo[2,1-*α*]quinolin-5(6*H*)-ylidene)malononitrile 5m**

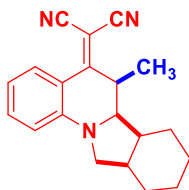

Flash column chromatography on a silica gel (ethyl acetate: petroleum ether, 1:100) afforded the product (17.3 mg, 57% yield) as a red solid, mp: 137-139 °C

**<sup>1</sup>H NMR** (500 MHz, CDCl<sub>3</sub>) δ 8.16 (dd, *J* = 8.3, 1.2 Hz, 1H), 7.39 – 7.30 (m, 1H), 6.69 – 6.59 (m, 1H), 6.48 (d, *J* = 8.4 Hz, 1H), 3.77 (dd, *J* = 10.6, 3.3 Hz, 1H), 3.44 (dd, *J* = 9.9, 6.2 Hz, 1H), 3.19 (d, *J* = 9.9 Hz, 1H), 3.09 (dd, *J* = 6.9, 3.4 Hz, 1H), 2.41 – 2.27 (m, 2H), 1.82 – 1.68 (m, 4H), 1.66 – 1.56 (m, 2H), 1.35 – 1.25 (m, 3H), 0.94 (d, *J* = 6.9 Hz, 3H); **<sup>13</sup>C NMR** (125 MHz, CDCl<sub>3</sub>) δ 172.0, 146.4, 136.2, 129.2, 115.7, 115.1, 114.3, 112.7, 112.1, 72.4, 56.5, 53.5, 37.8, 36.3, 33.5, 28.7, 25.0, 23.5, 21.1, 11.9. **HRMS (ESI)**: calcd. for C<sub>20</sub>H<sub>21</sub>N<sub>3</sub> [M+H]<sup>+</sup>: 304.1808, found: 304.1806.

**2-((3*aR*,4*R*)-4-ethyl-2,3,3*a*,4-tetrahydropyrrolo[1,2-*α*]quinolin-5(1*H*)-ylidene)malononitrile 5n**

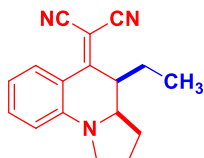

Flash column chromatography on a silica gel (ethyl acetate: petroleum ether, 1:80) afforded the product (14.7 mg, 56% yield) as a red oily.

**<sup>1</sup>H NMR** (500 MHz, CDCl<sub>3</sub>) δ 8.02 (dd, *J* = 8.2, 1.1 Hz, 1H), 7.37 – 7.32 (m, 1H), 6.68 – 6.60 (m, 1H), 6.48 (d, *J* = 8.4 Hz, 1H), 3.83 – 3.68 (m, 1H), 3.47 (dd, *J* = 13.3, 5.4 Hz, 1H), 3.30 (dd, *J* = 17.3, 9.2 Hz,



1H), 3.08 – 3.02 (m, 1H), 2.23 – 2.17 (m, 1H), 2.09 (dd,  $J = 11.2, 5.6$  Hz, 1H), 2.03 – 1.92 (m, 2H), 1.73 – 1.62 (m, 2H), 0.89 (t,  $J = 7.5$  Hz, 3H);  $^{13}\text{C}$  NMR (125 MHz,  $\text{CDCl}_3$ )  $\delta$  171.9, 145.6, 136.1, 129.0, 115.7, 114.7, 114.6, 112.6, 112.1, 74.6, 58.8, 46.6, 41.1, 27.4, 23.3, 19.4, 10.9. **HRMS (ESI):** calcd. for  $\text{C}_{17}\text{H}_{17}\text{N}_3$   $[\text{M}+\text{H}]^+$ : 264.1495, found: 264.1495.

#### 4. Crystal Structures and Data

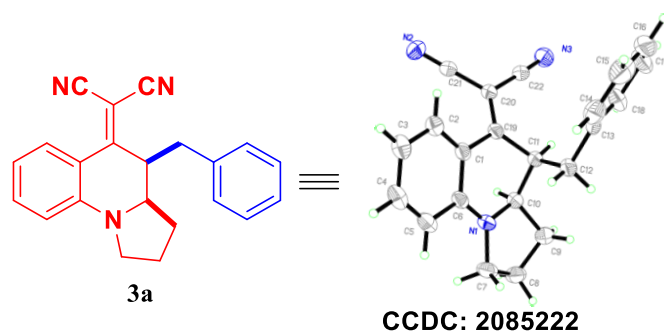

Table 1. Crystal data and structure refinement for 3a.

|                                      |                                                                                                                               |
|--------------------------------------|-------------------------------------------------------------------------------------------------------------------------------|
| Identification code                  | 3a                                                                                                                            |
| Empirical formula                    | $\text{C}_{22}\text{H}_{19}\text{N}_3$                                                                                        |
| Formula weight                       | 325.40                                                                                                                        |
| Temperature                          | 293(2) K                                                                                                                      |
| Wavelength                           | 1.54184 Å                                                                                                                     |
| Crystal system, space group          | Monoclinic, $P2(1)/n$                                                                                                         |
| Unit cell dimensions                 | $a = 12.6563(6)$ Å $\alpha = 90$ deg.<br>$b = 9.6499(4)$ Å $\beta = 104.392(5)$ deg.<br>$c = 14.6371(7)$ Å $\gamma = 90$ deg. |
| Volume                               | $1731.55(13)$ Å <sup>3</sup>                                                                                                  |
| Z, Calculated density                | 4, 1.248 Mg/m <sup>3</sup>                                                                                                    |
| Absorption coefficient               | $0.580$ mm <sup>-1</sup>                                                                                                      |
| F(000)                               | 688                                                                                                                           |
| Crystal size                         | 0.230 x 0.210 x 0.180 mm                                                                                                      |
| Theta range for data collection      | 4.140 to 67.219 deg.                                                                                                          |
| Limiting indices                     | $-15 \leq h \leq 11$ , $-11 \leq k \leq 8$ , $-13 \leq l \leq 17$                                                             |
| Reflections collected / unique       | 5821 / 3076 [ $R(\text{int}) = 0.0300$ ]                                                                                      |
| Completeness to theta = 67.219       | 99.5 %                                                                                                                        |
| Refinement method                    | Full-matrix least-squares on $F^2$                                                                                            |
| Data / restraints / parameters       | 3076 / 0 / 227                                                                                                                |
| Goodness-of-fit on $F^2$             | 1.044                                                                                                                         |
| Final R indices [ $I > 2\sigma(I)$ ] | $R1 = 0.0518$ , $wR2 = 0.1287$                                                                                                |
| R indices (all data)                 | $R1 = 0.0690$ , $wR2 = 0.1457$                                                                                                |
| Extinction coefficient               | 0.0097(7)                                                                                                                     |
| Largest diff. peak and hole          | 0.169 and -0.209 e.Å <sup>-3</sup>                                                                                            |

## References:

1. (a) W. N. Nijhuis, W. Verboom and D. N. Reinhoudt, *J. Am. Chem. Soc.*, 1987, **109**, 3136-3138; (b) W. N. Nijhuis, W. Verboom, A. A. El-Fadl, S. Harkema and D. N. Reinhoudt, *J. Org. Chem.*, 1989, **54**, 199-209; (c) R. Deme, M. Schlich, Z. Mucsi, G. Karvaly, G. Tóth and P. Mátyus, *Arkivoc*, 2016, **2016**, 164-196.

## 5. $^1\text{H}$ and $^{13}\text{C}$ NMR Spectra

### 2-(4-benzyl-2,3,3a,4-tetrahydropyrrolo[1,2-a]quinolin-5(1H)-ylidene)malononitrile 3a

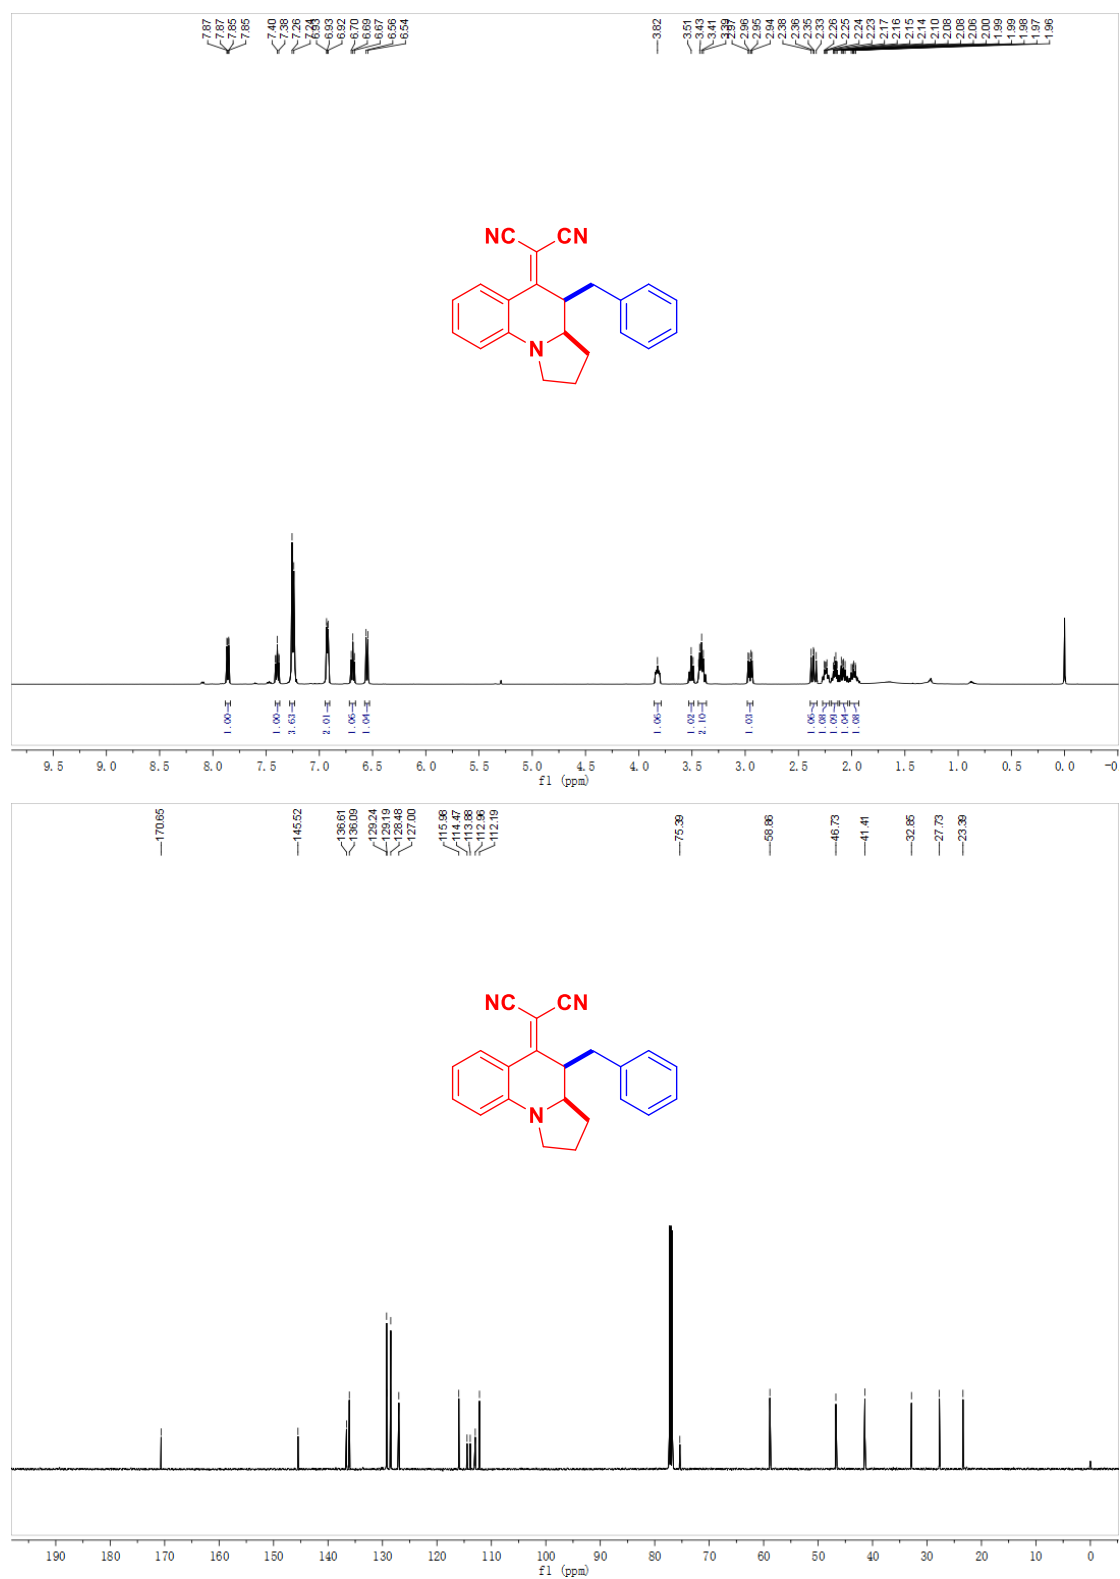

**2-((3*aR*,4*R*)-4-(4-methoxybenzyl)-2,3,3*a*,4-tetrahydropyrrolo[1,2-*a*]quinolin-5(1*H*)-ylidene)malononitrile 3b**

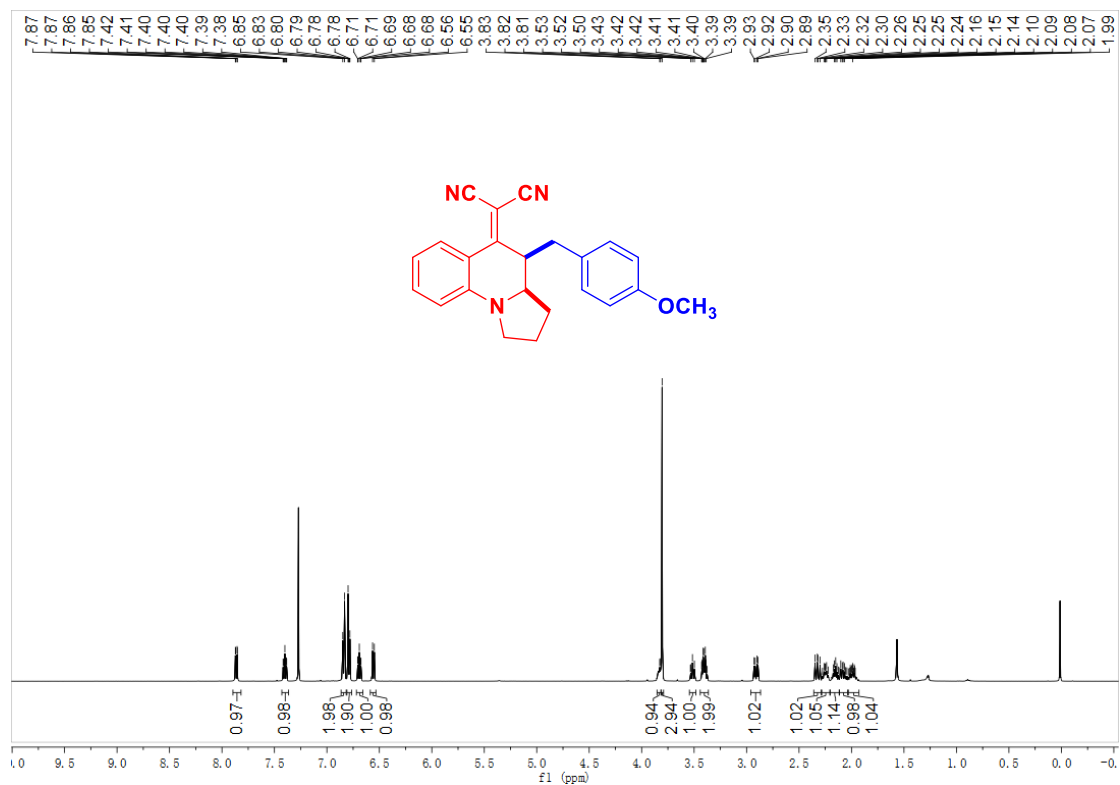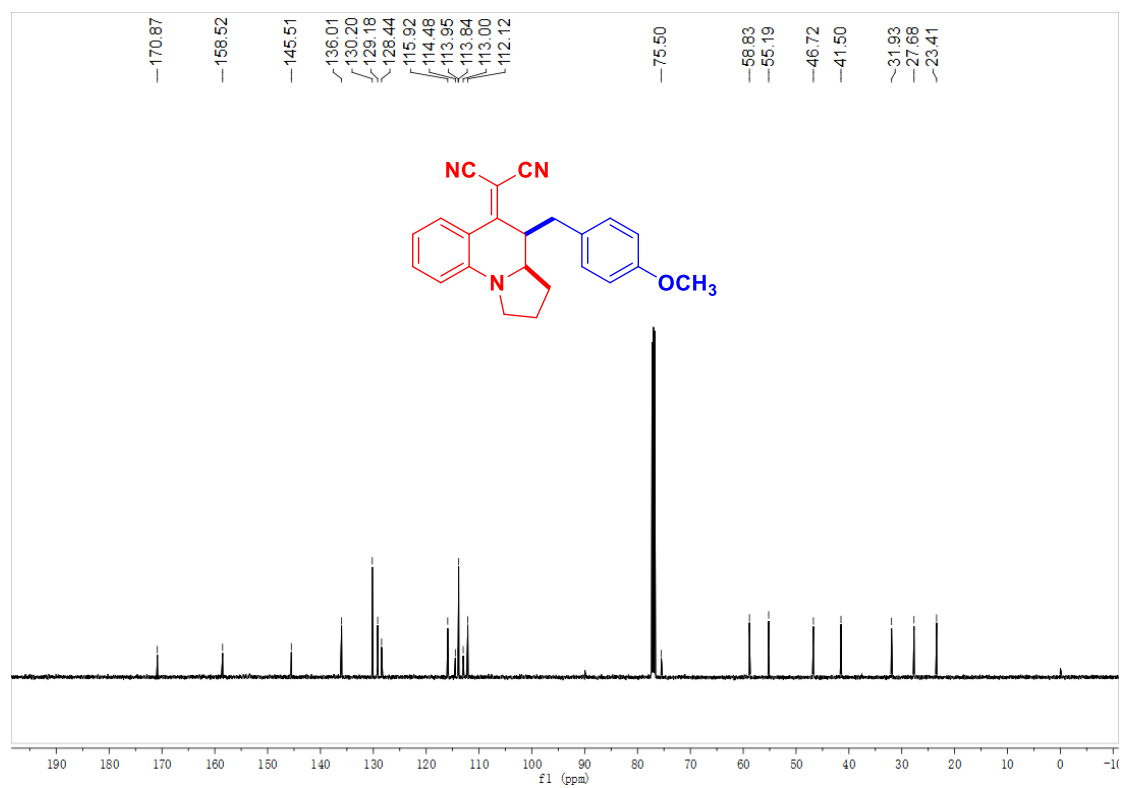

2-((3*aR*,4*R*)-4-(4-methylbenzyl)-2,3,3*a*,4-tetrahydropyrrolo[1,2-*a*]quinolin-5(1*H*)-ylidene)malononitrile **3c**

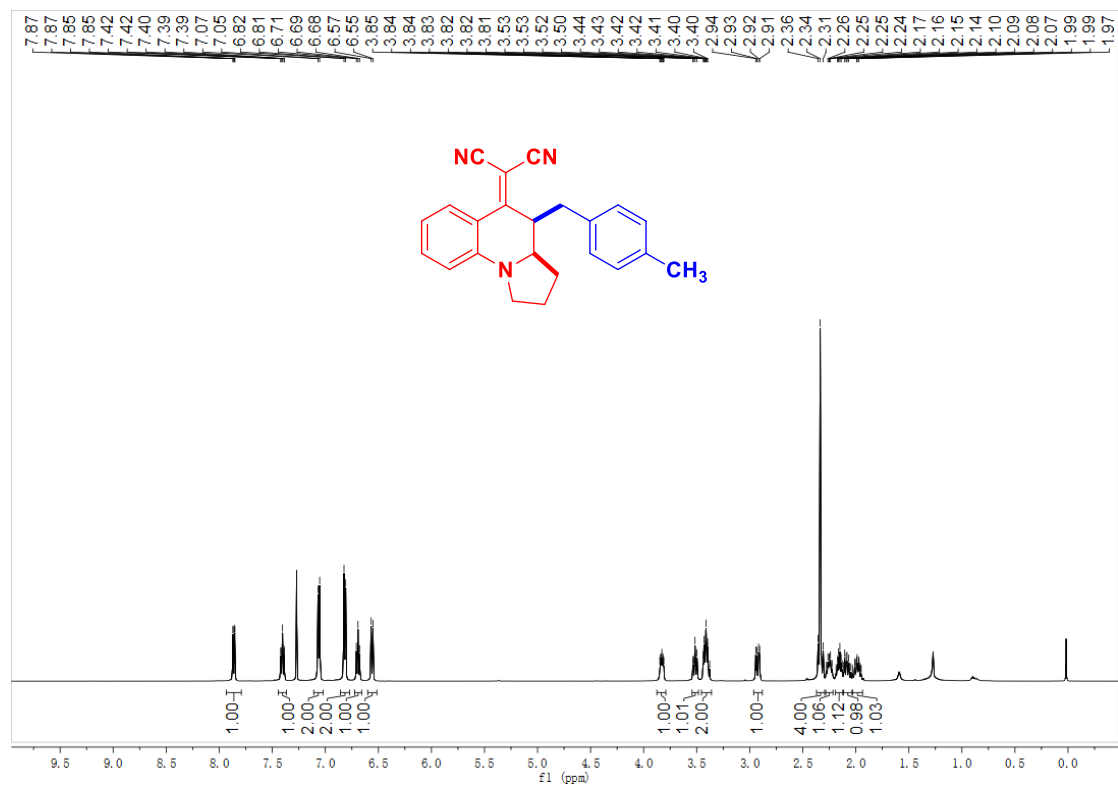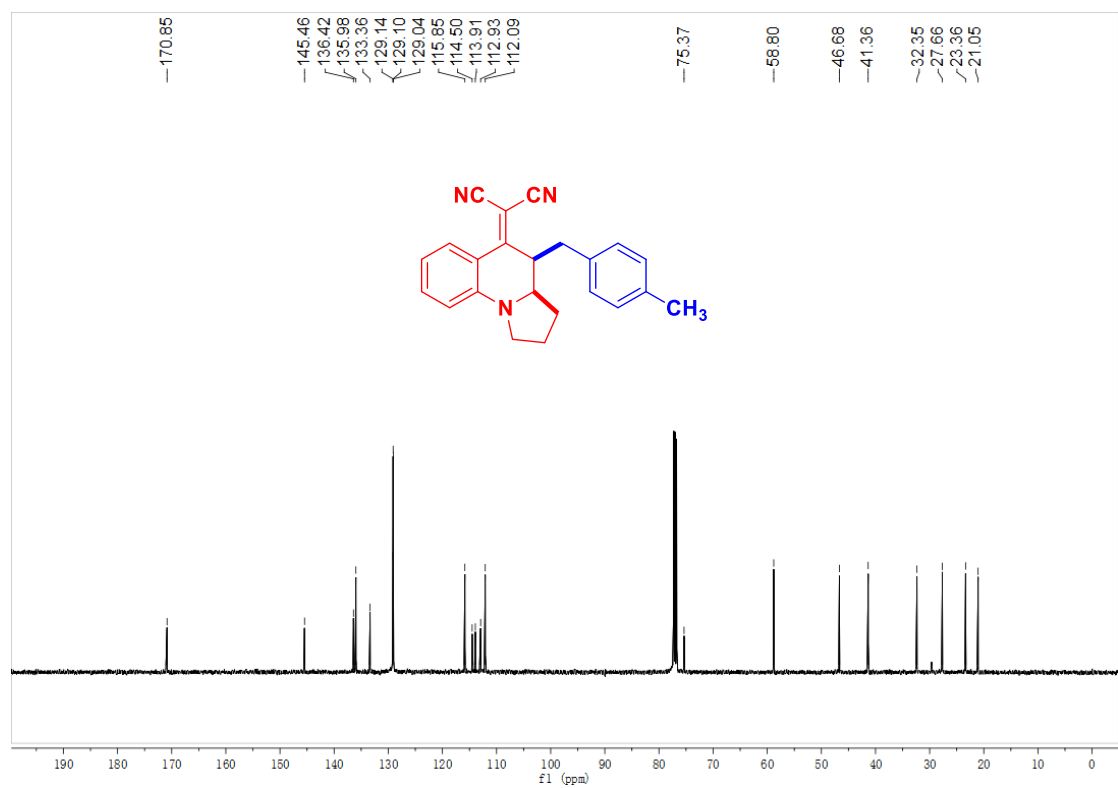

**2-((3a*R*,4*R*)-4-(2-fluoro-4-methoxybenzyl)-2,3,3a,4-tetrahydropyrrolo[1,2-*a*]quinolin-5(1*H*)-ylidene)malononitrile 3d**

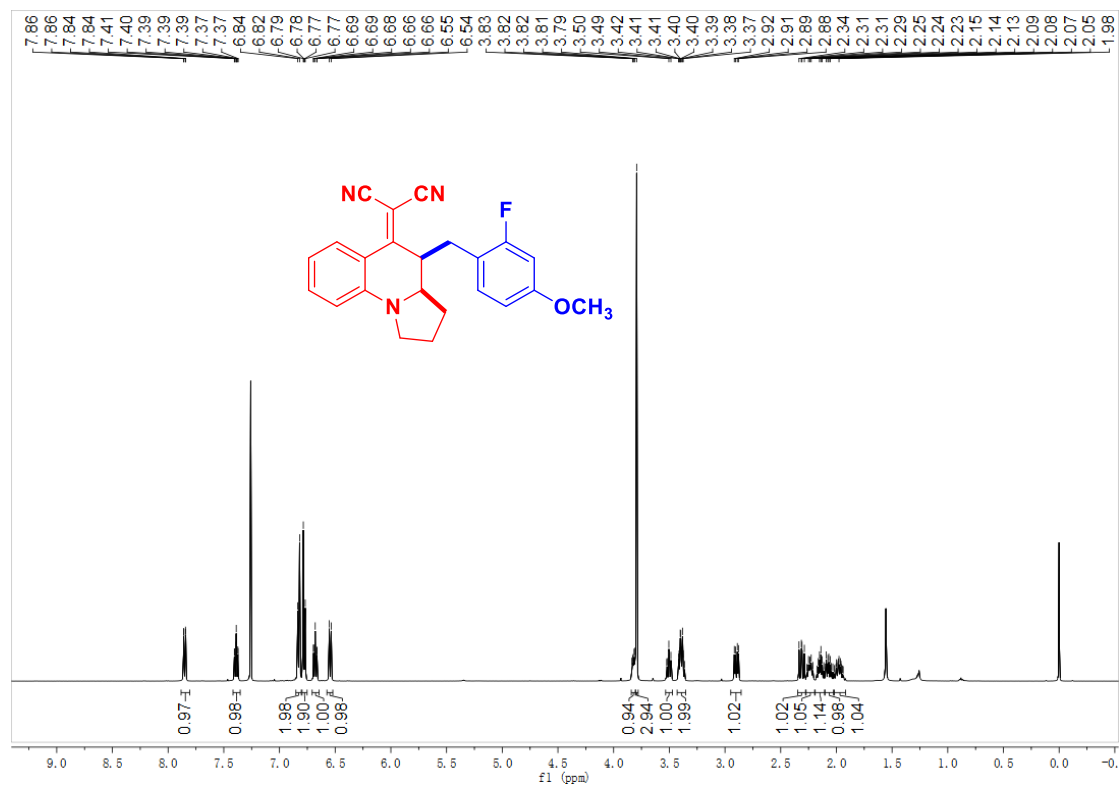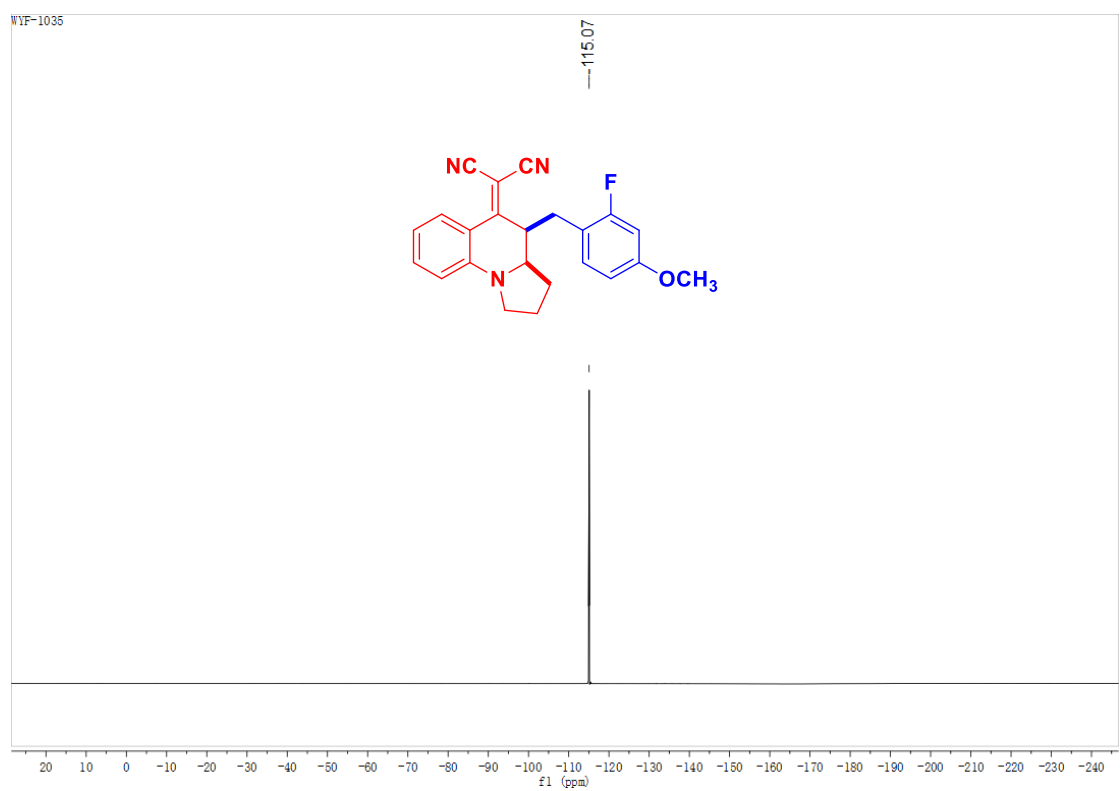

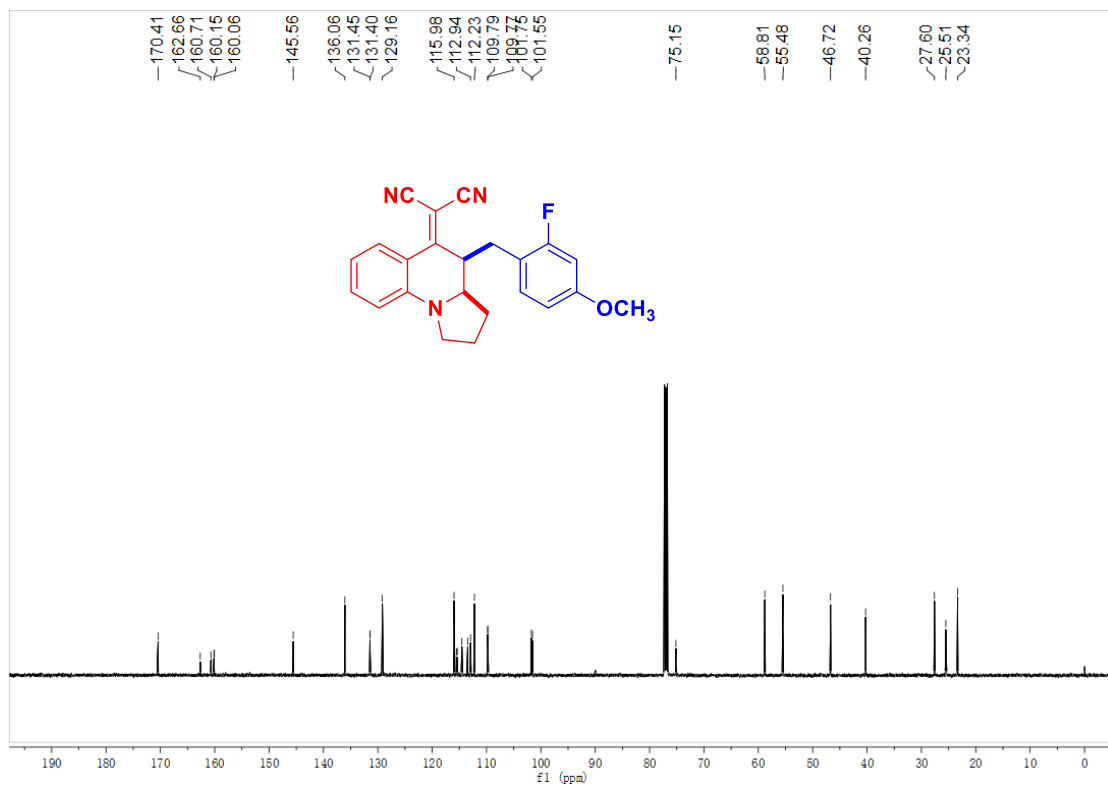

**2-((3a*R*,4*R*)-4-(4-fluorobenzyl)-2,3,3a,4-tetrahydropyrrolo[1,2-*α*]quinolin-5(1*H*)-ylidene)malononitrile 3e**

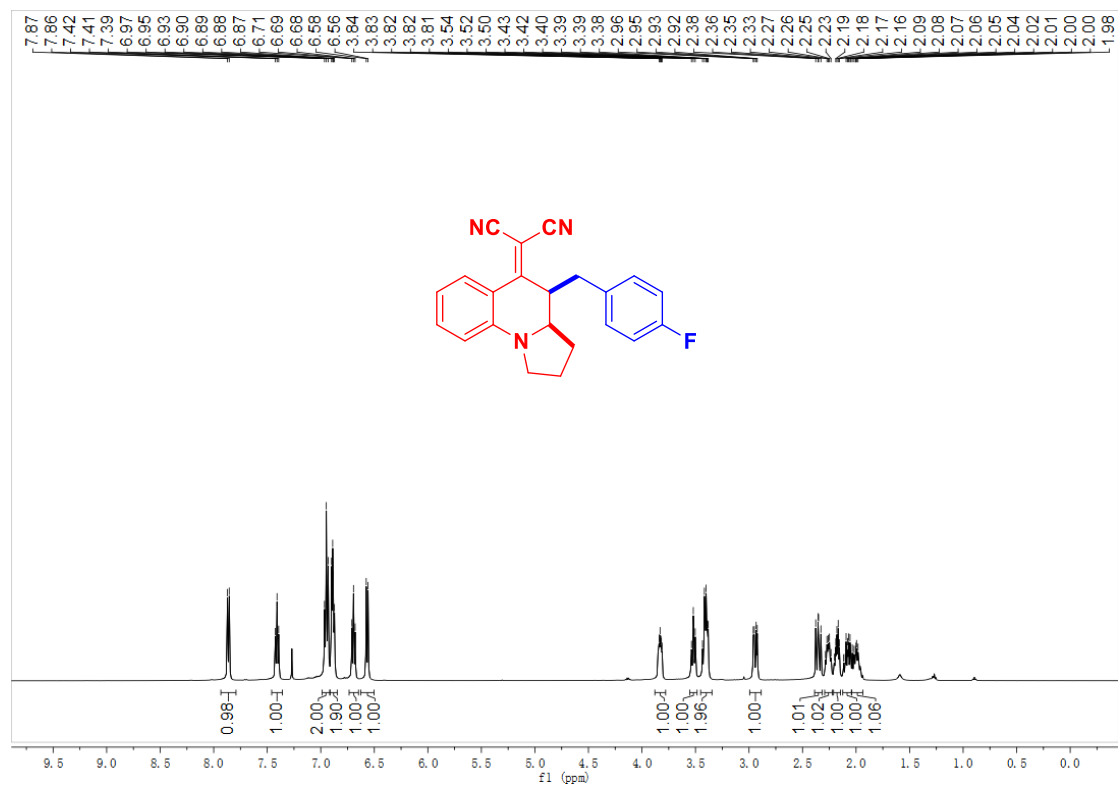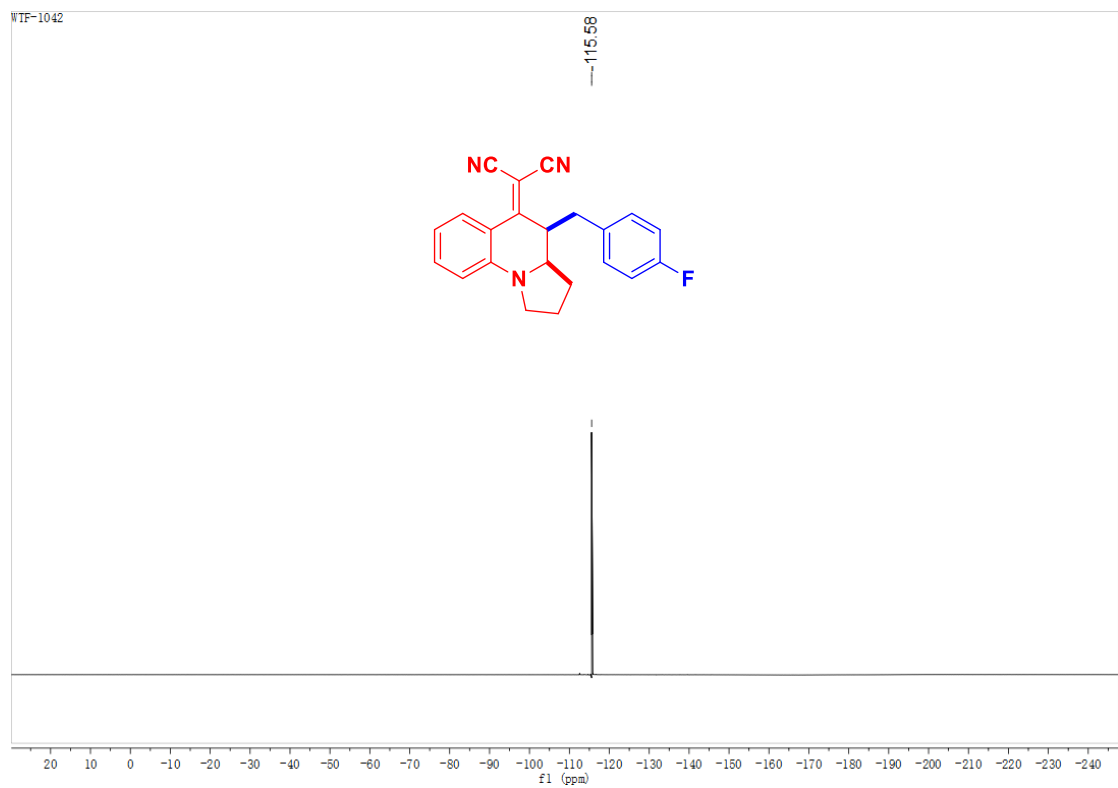



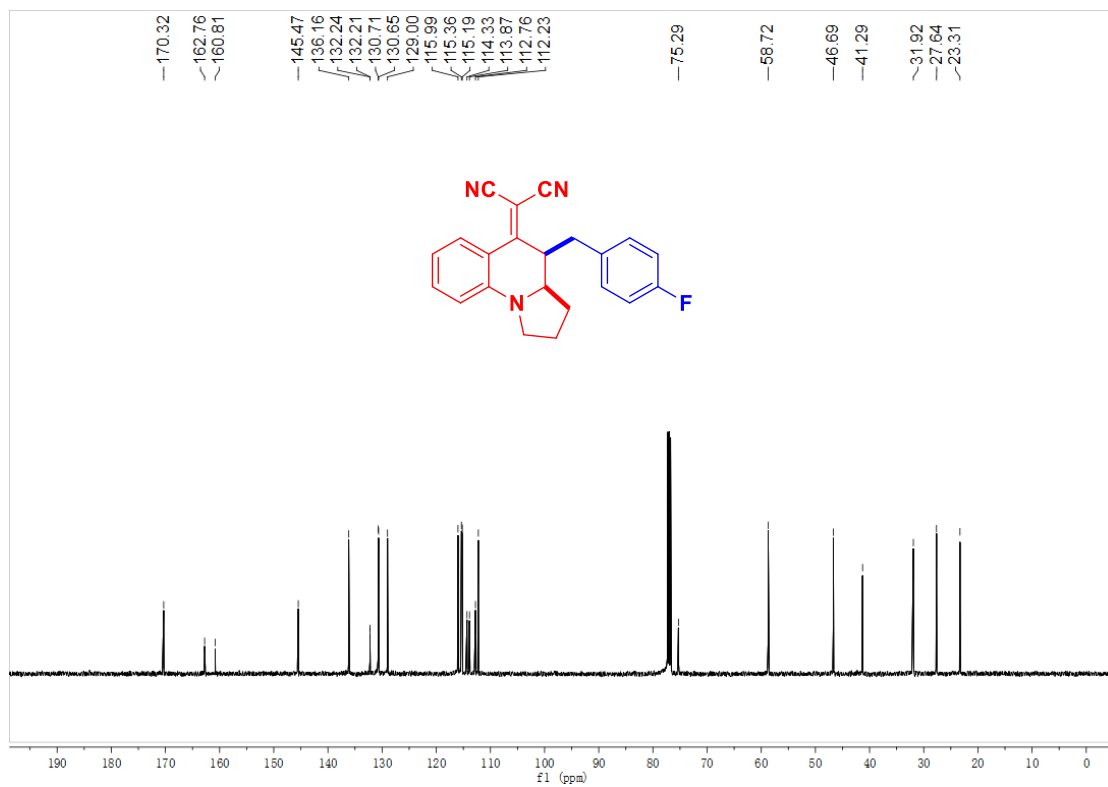

2-((3*aR*,4*R*)-4-(4-chlorobenzyl)-2,3,3*a*,4-tetrahydropyrrolo[1,2-*a*]quinolin-5(1*H*)-ylidene)malononitrile **3f**

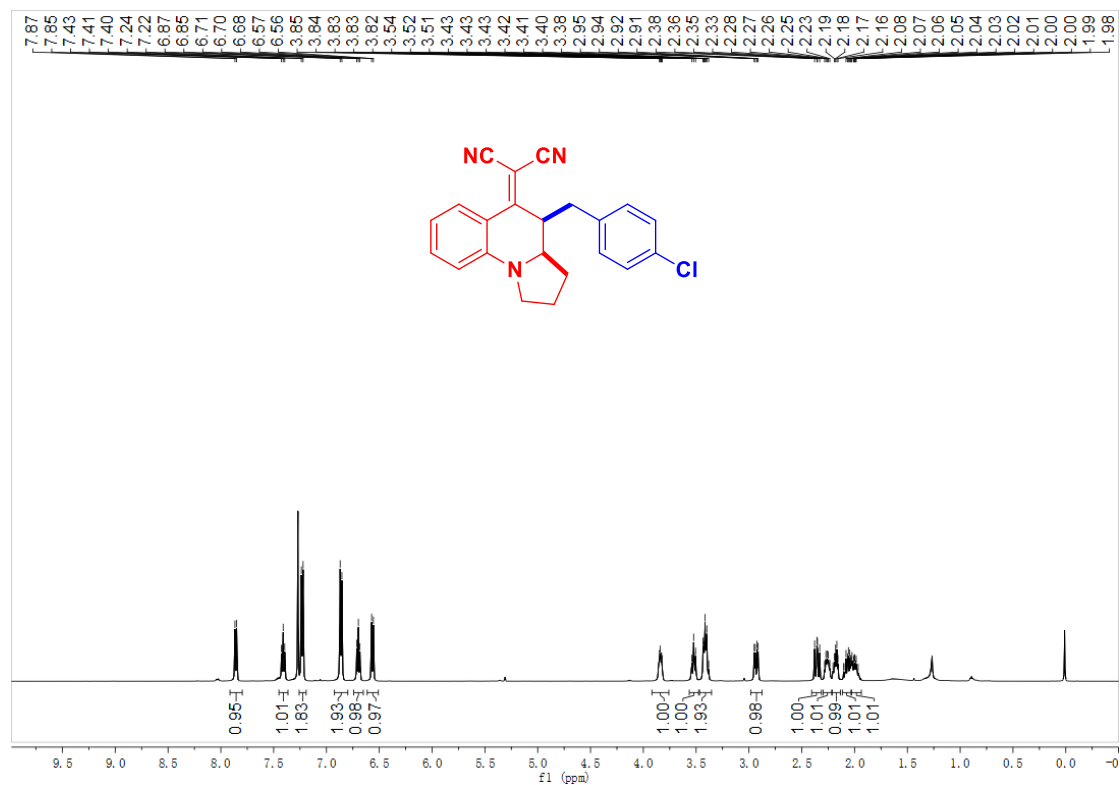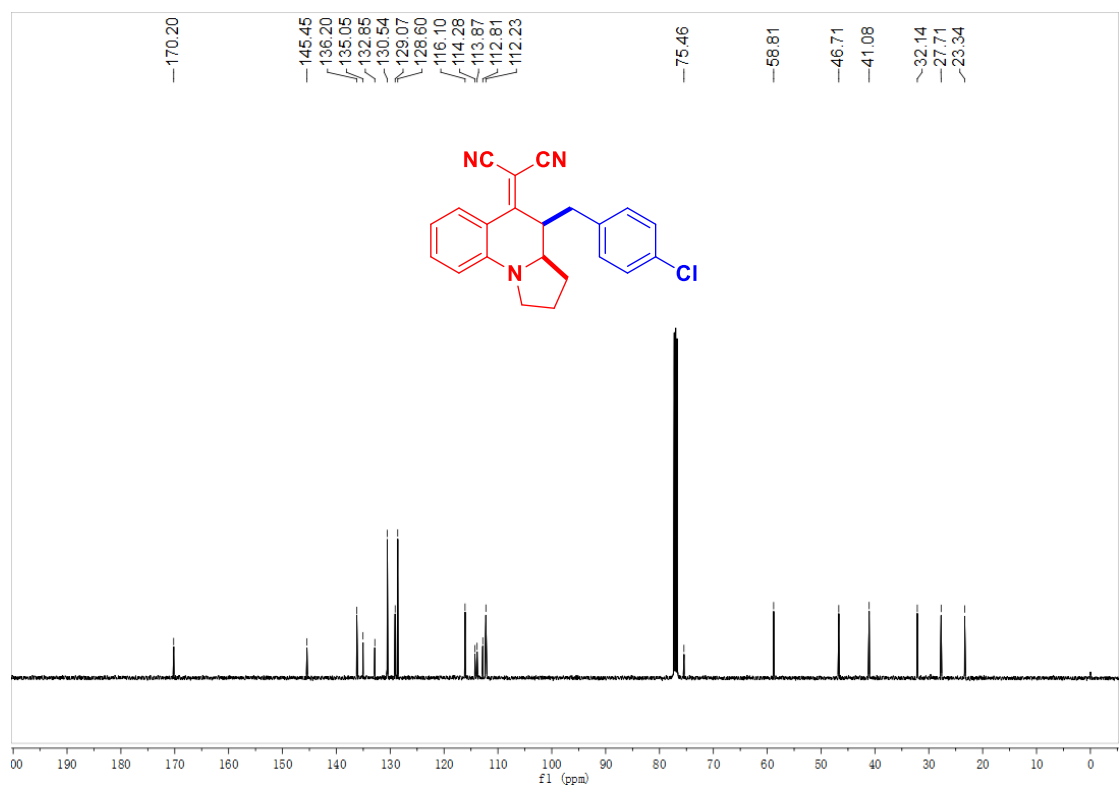

**2-((3*aR*,4*R*)-4-(4-bromobenzyl)-2,3,3*a*,4-tetrahydropyrrolo[1,2-*a*]quinolin-5(1*H*)-ylidene)malononitrile 3g**

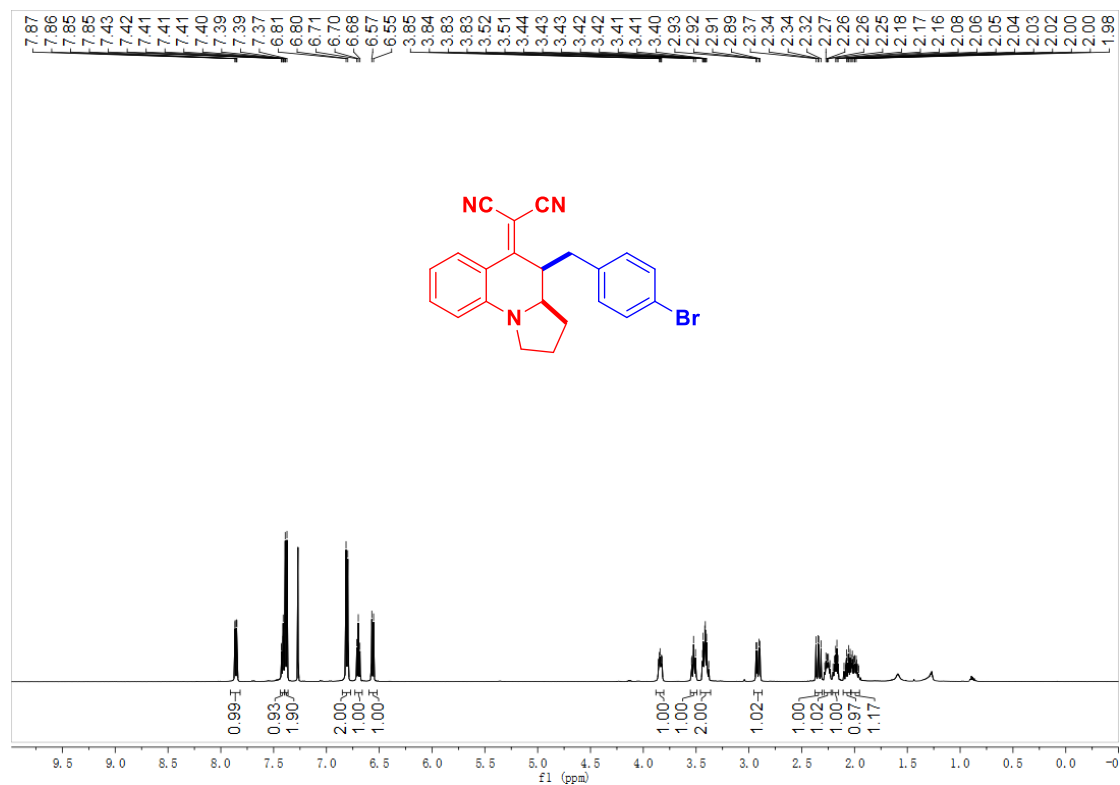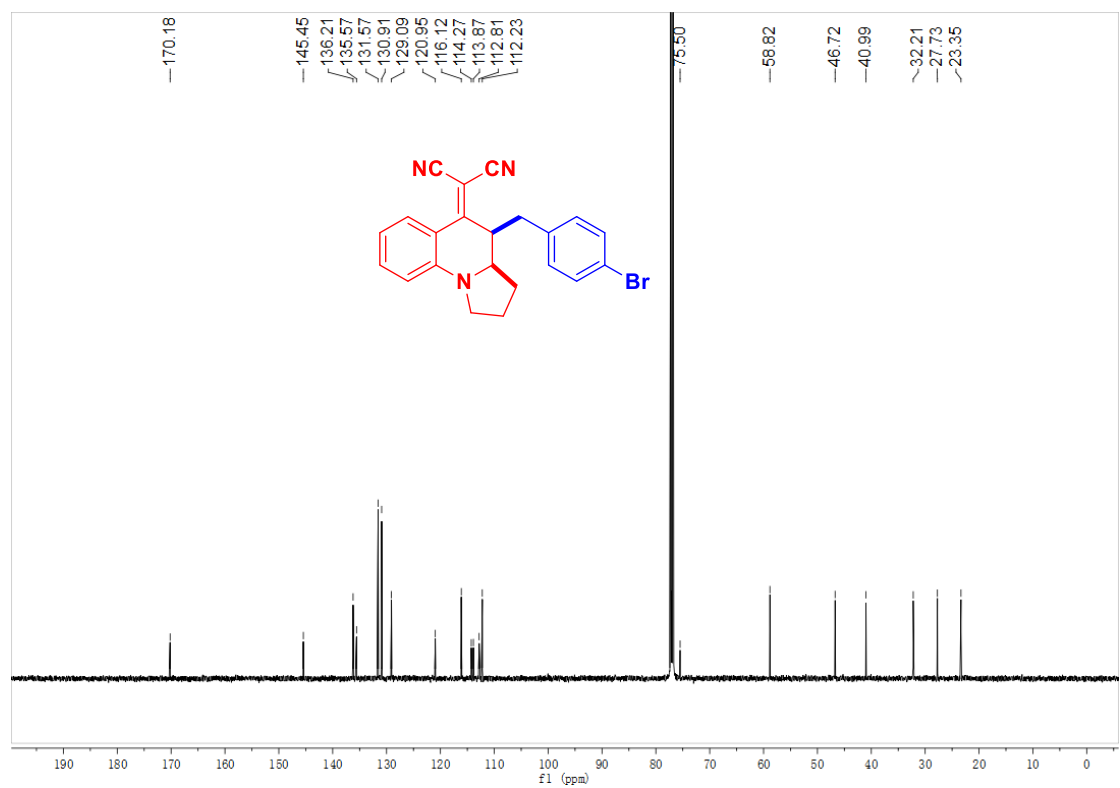

**2-((3a*R*,4*R*)-4-(2-(trifluoromethyl)benzyl)-2,3,3a,4-tetrahydropyrrolo[1,2-*a*]quinolin-5(1*H*)-ylidene)malononitrile 3h**

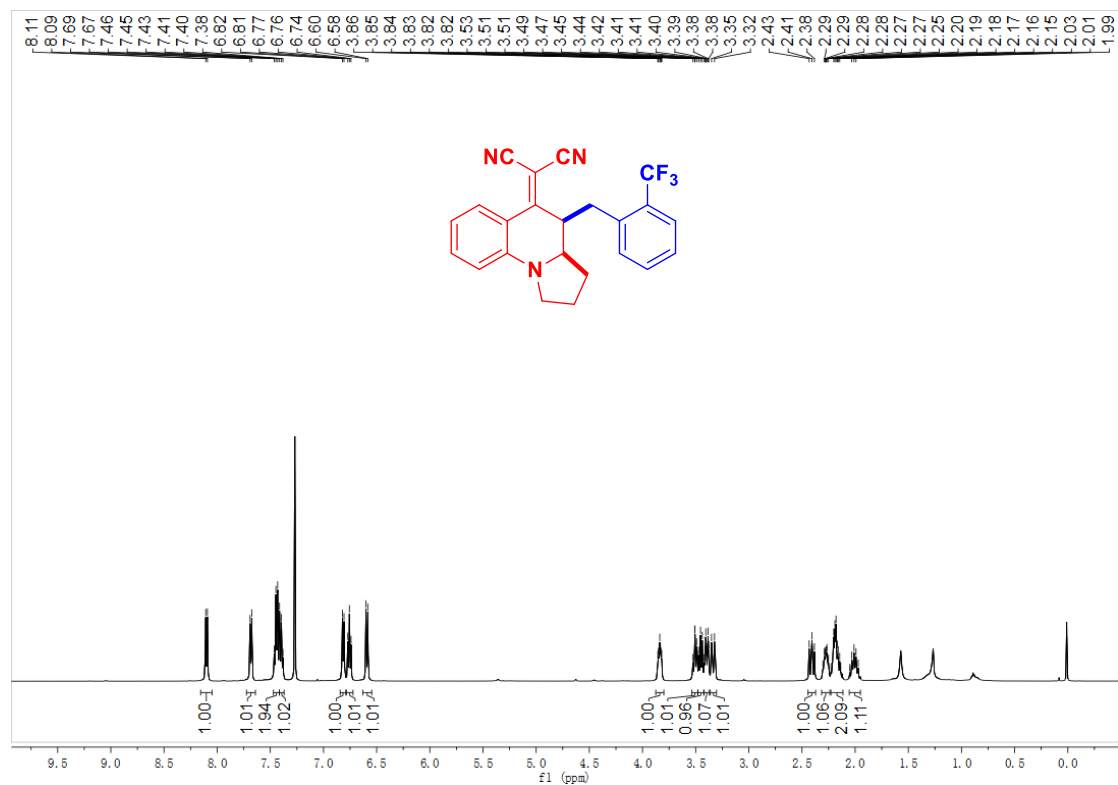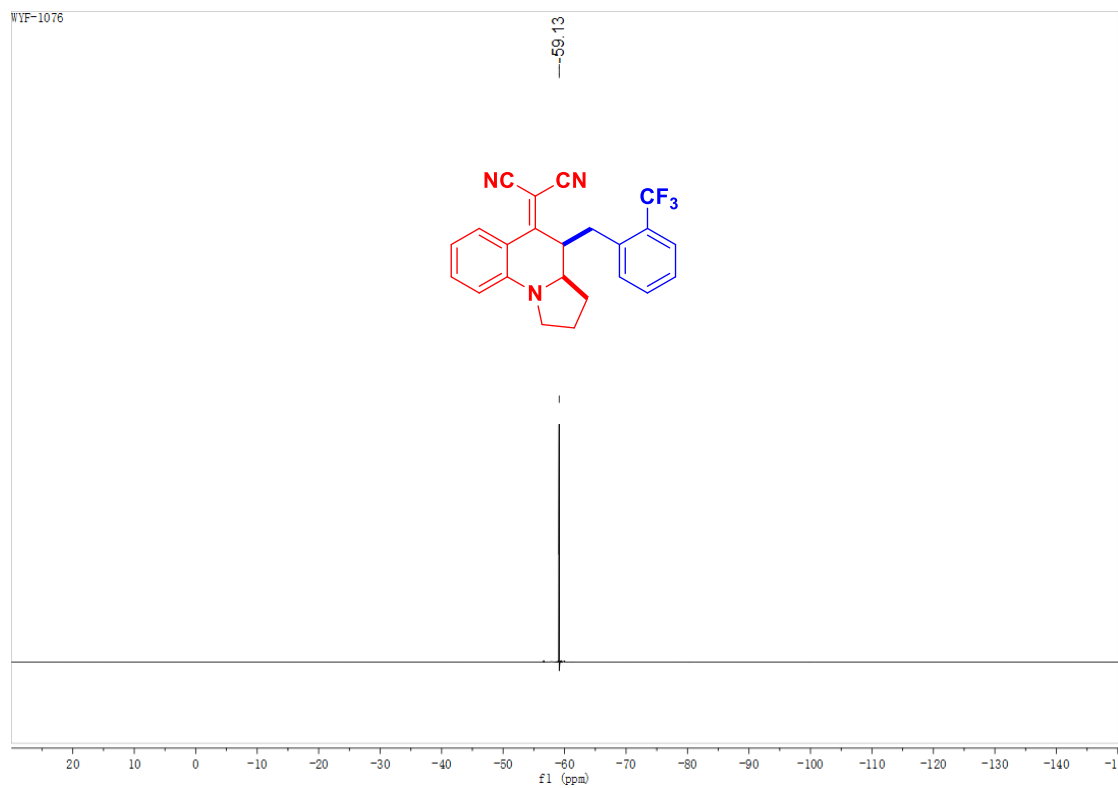

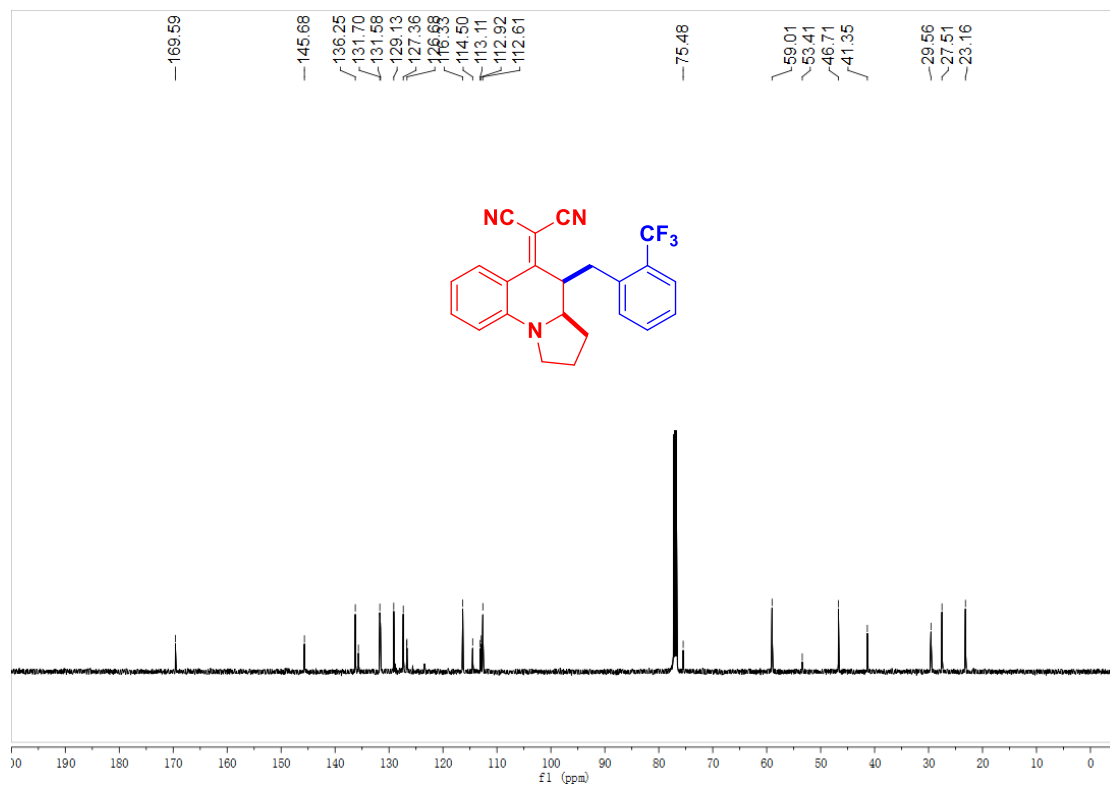



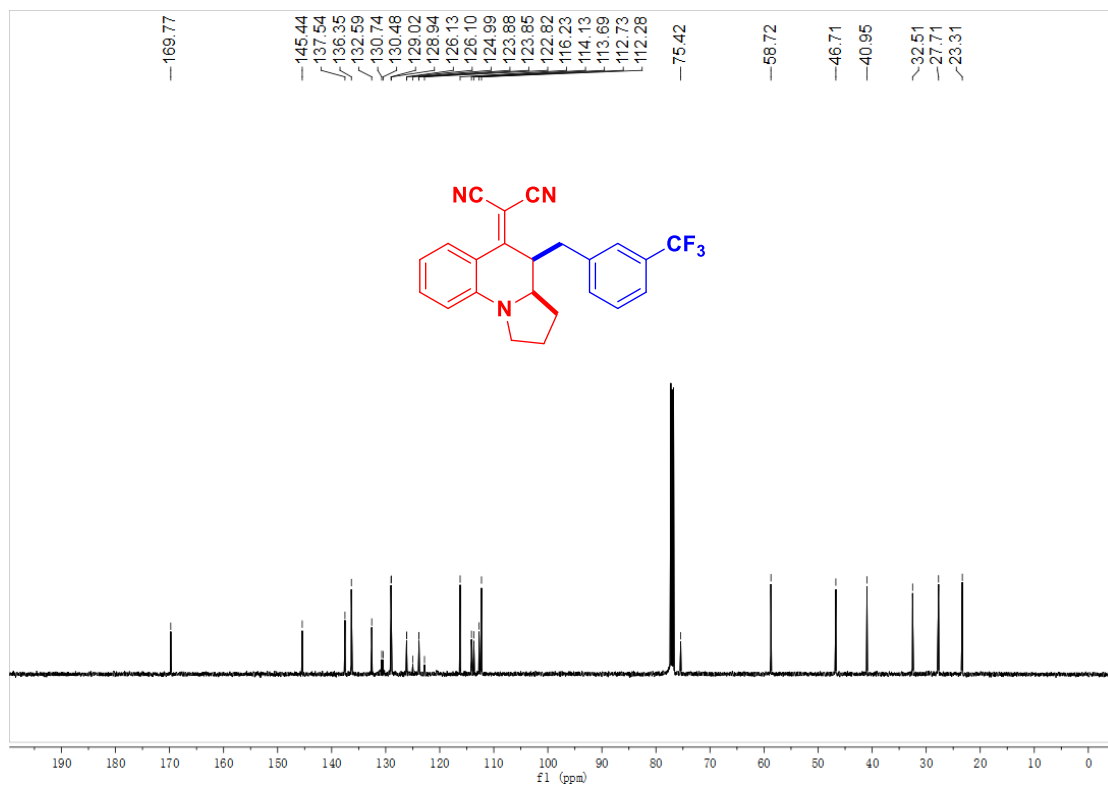

**2-(4-(naphthalen-1-ylmethyl)-2,3,3a,4-tetrahydropyrrolo[1,2- $\alpha$ ]quinolin-5(1H)-ylidene)malononitrile 3j**

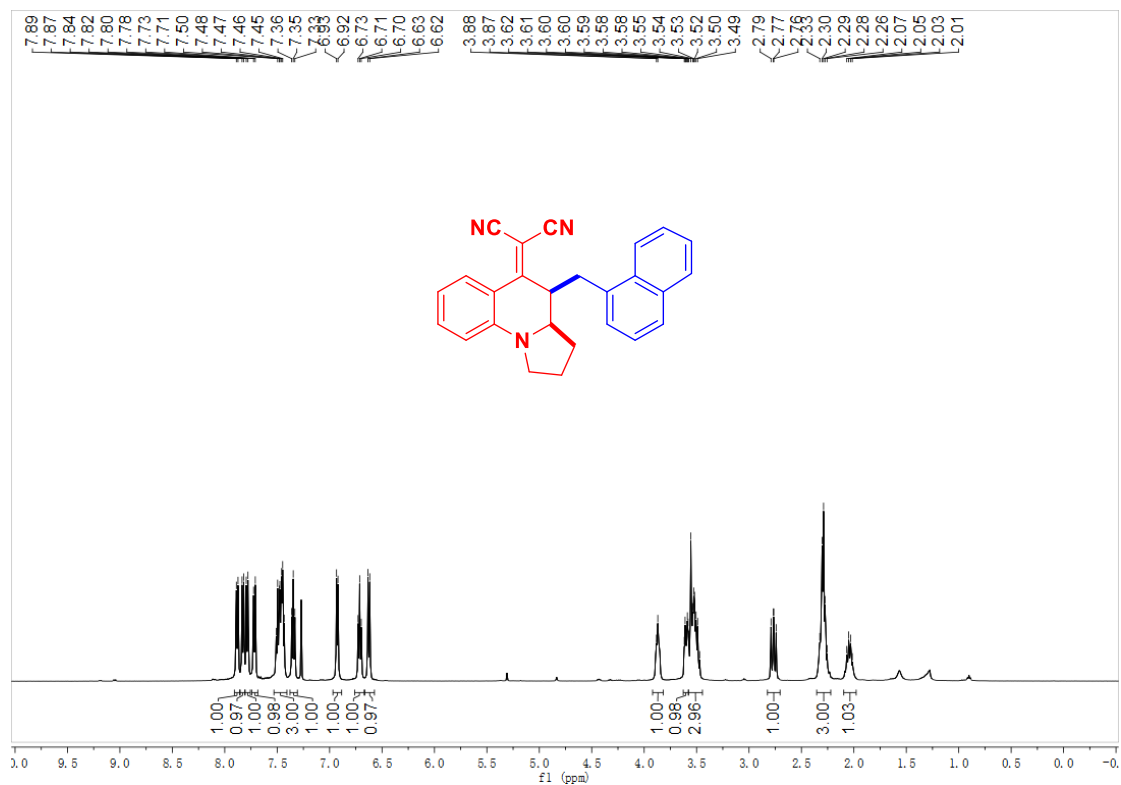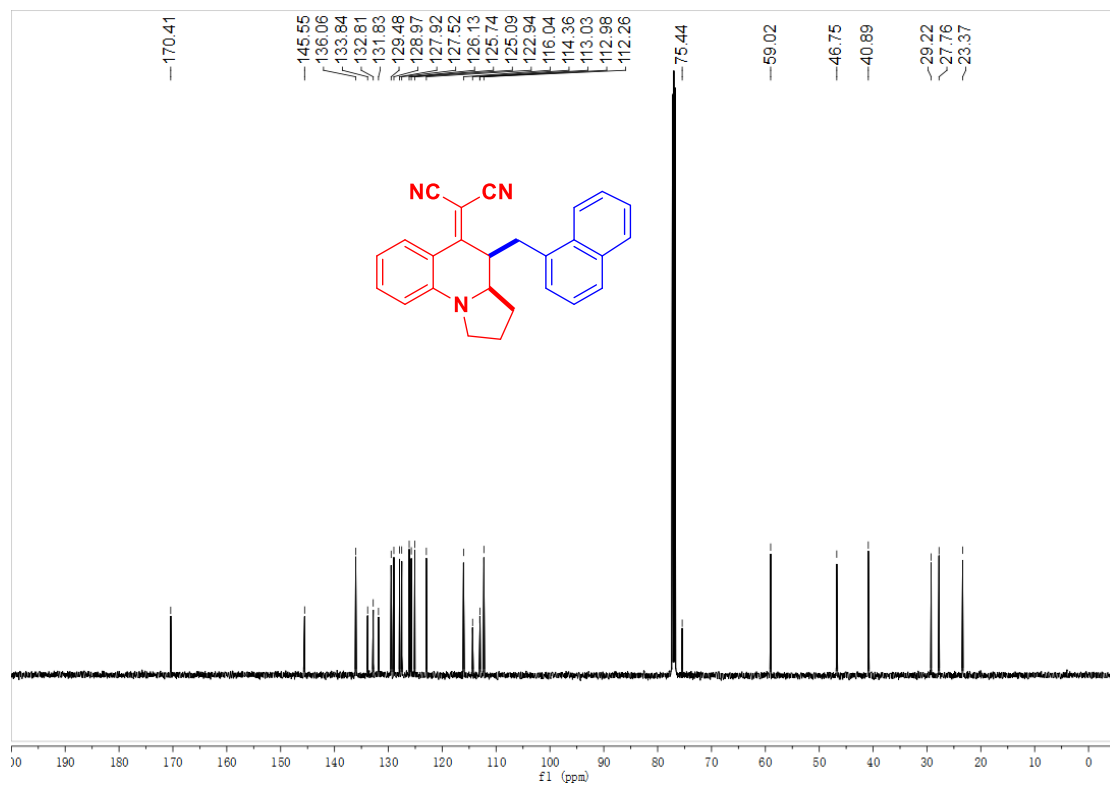



**2-((3*aR*,4*R*)-4-(naphthalen-2-ylmethyl)-2,3,3*a*,4-tetrahydropyrrolo[1,2-*a*]quinolin-5(1*H*)-ylidene)malononitrile 3k**

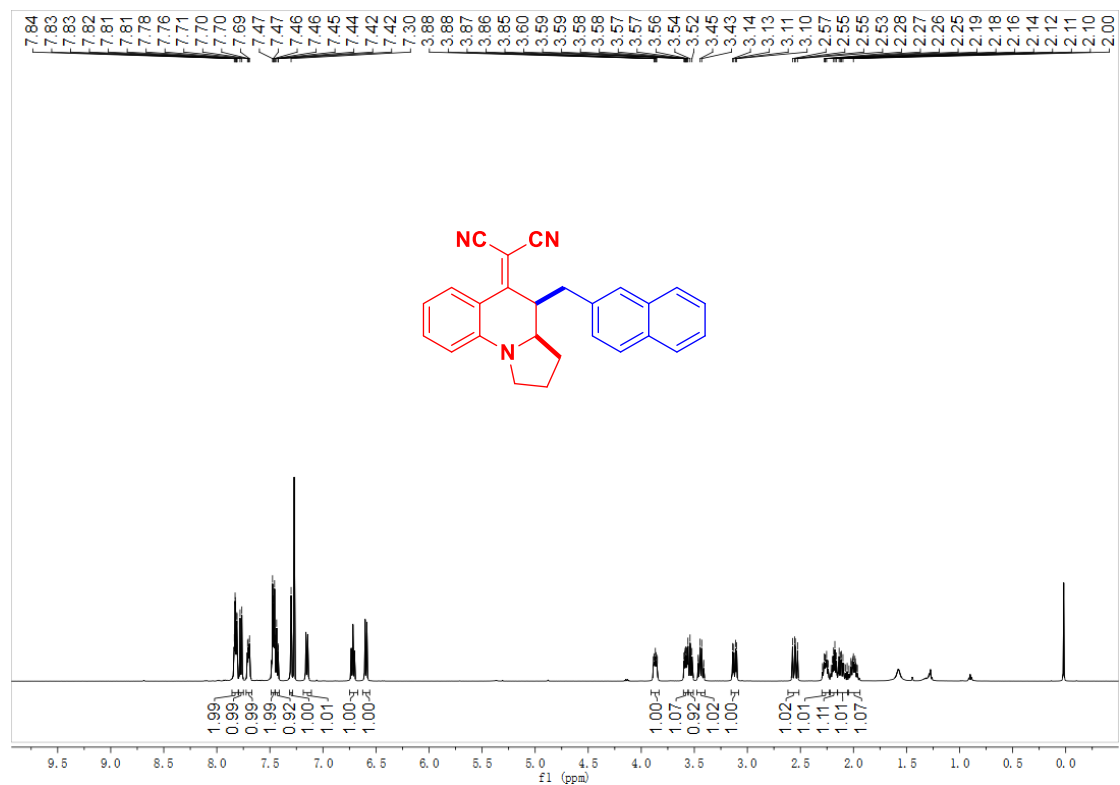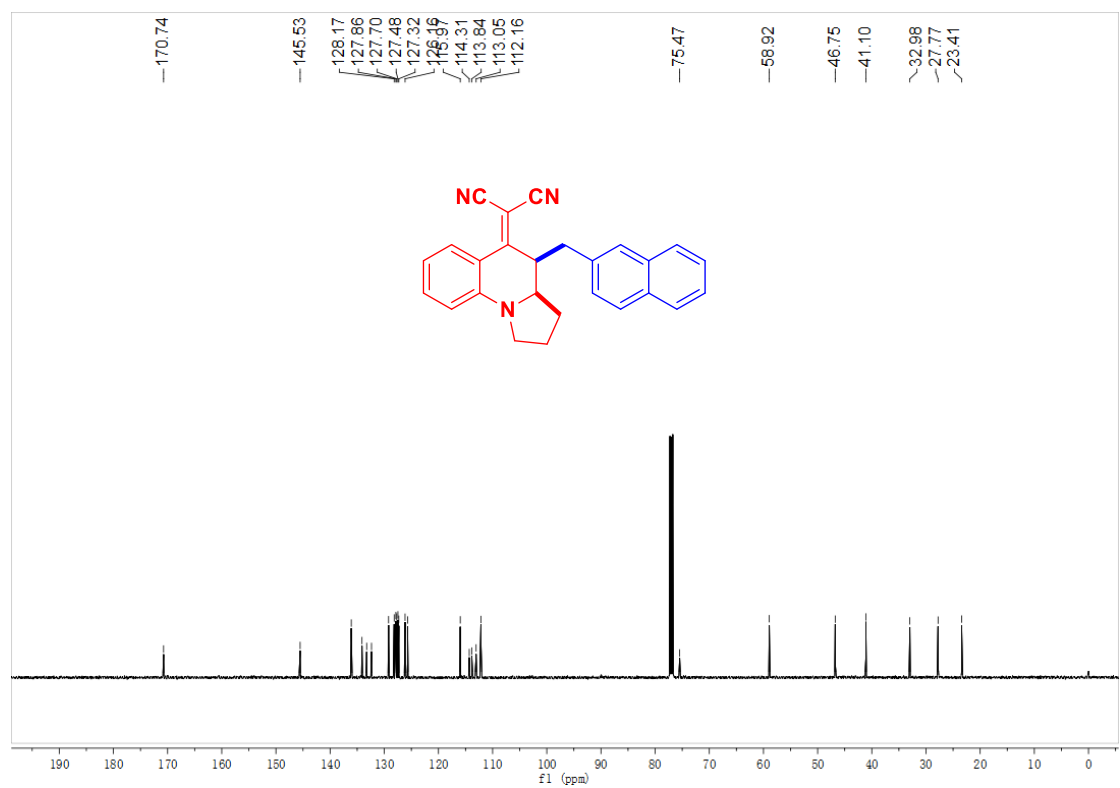

**2-((3*aR*,4*R*)-4-(4-(trifluoromethyl)benzyl)-2,3,3*a*,4-tetrahydropyrrolo[1,2-*a*]quinolin-5(1*H*)-ylidene)malononitrile 31**

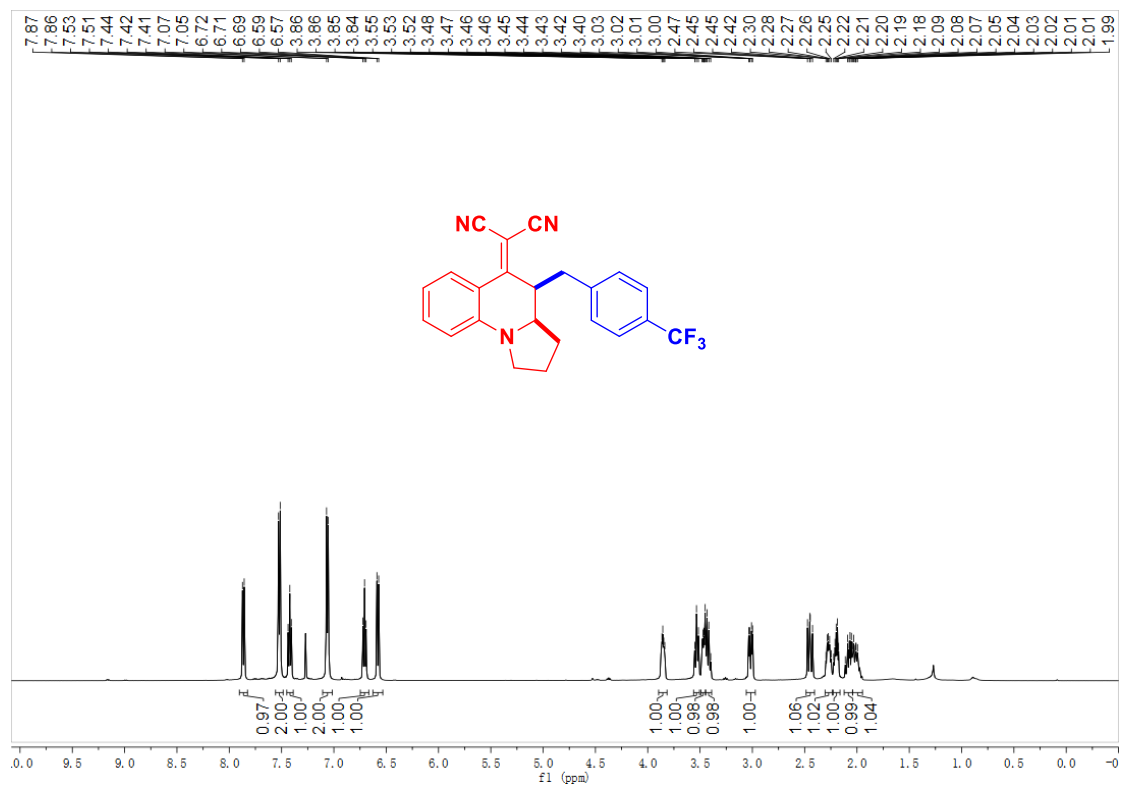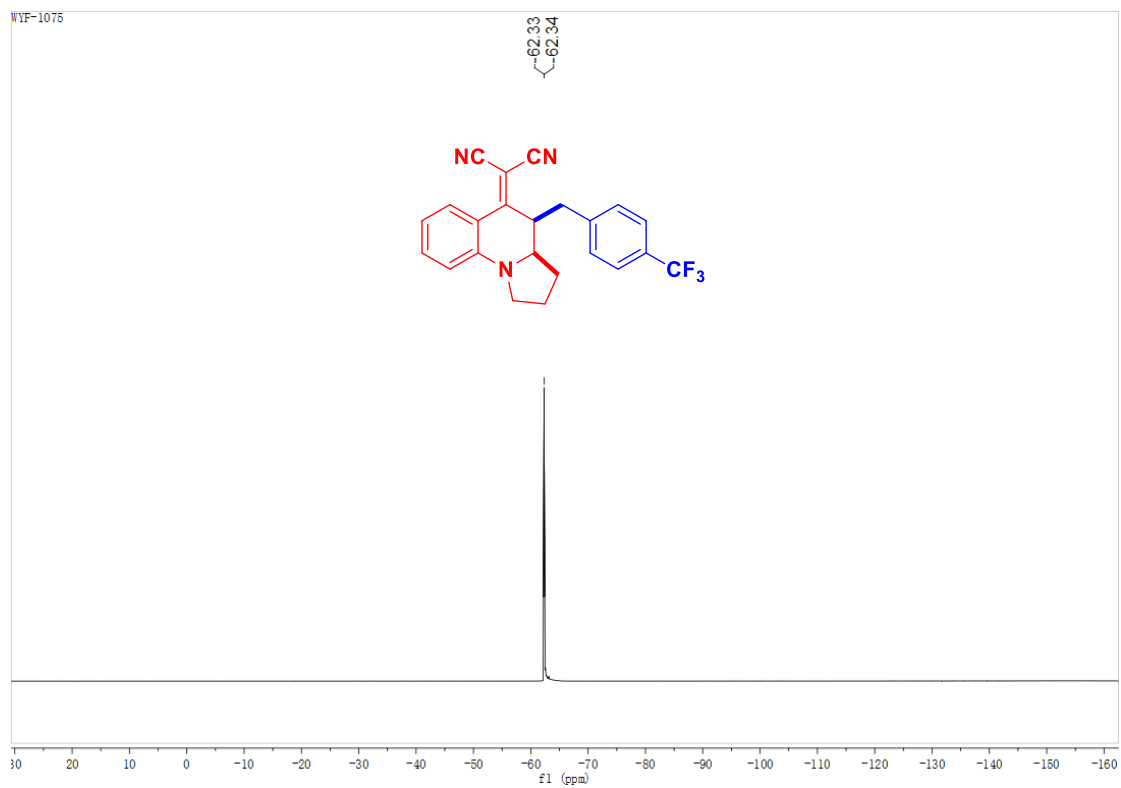

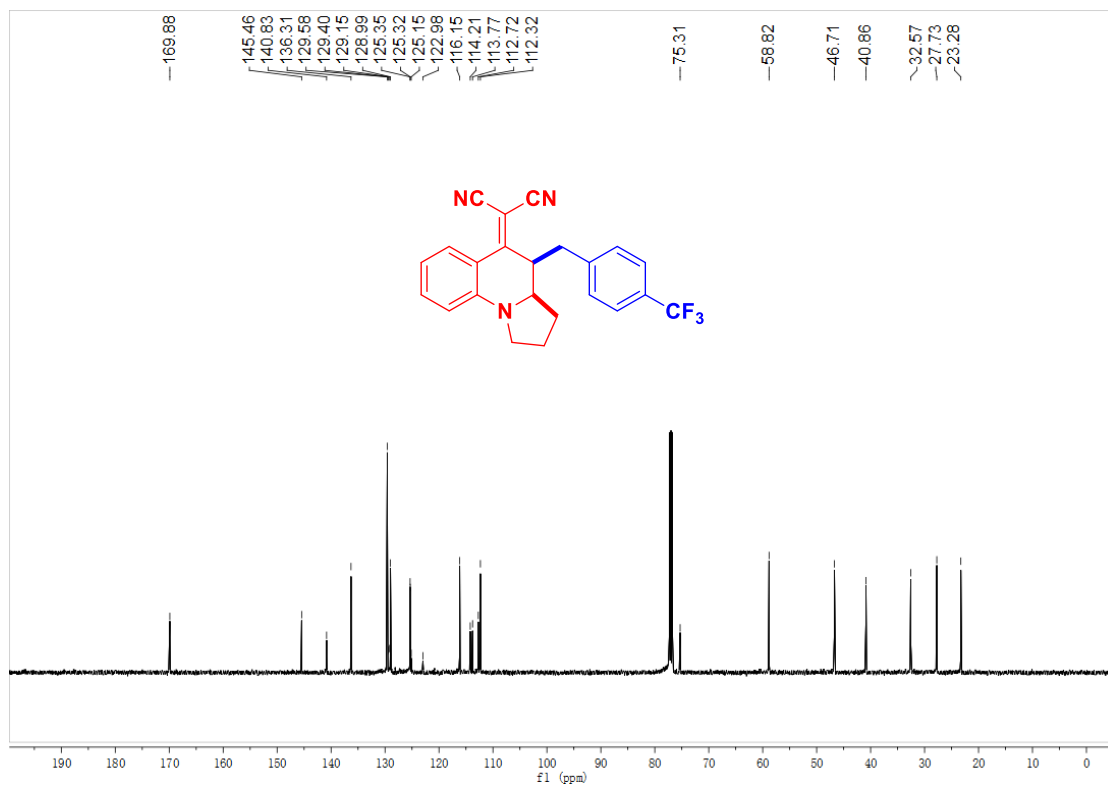

**2-((3*R*,4*R*)-4-(4-nitrobenzyl)-2,3,3a,4-tetrahydropyrrolo[1,2-*a*]quinolin-5(1*H*)-ylidene)malononitrile 3m**

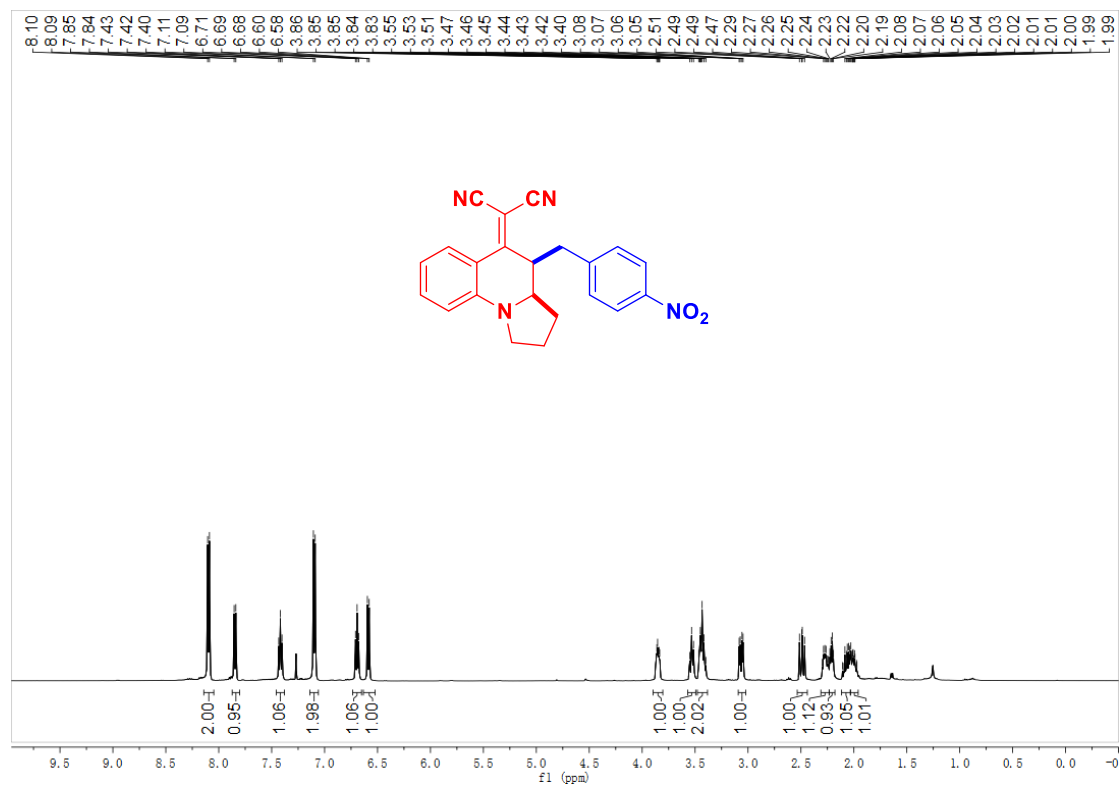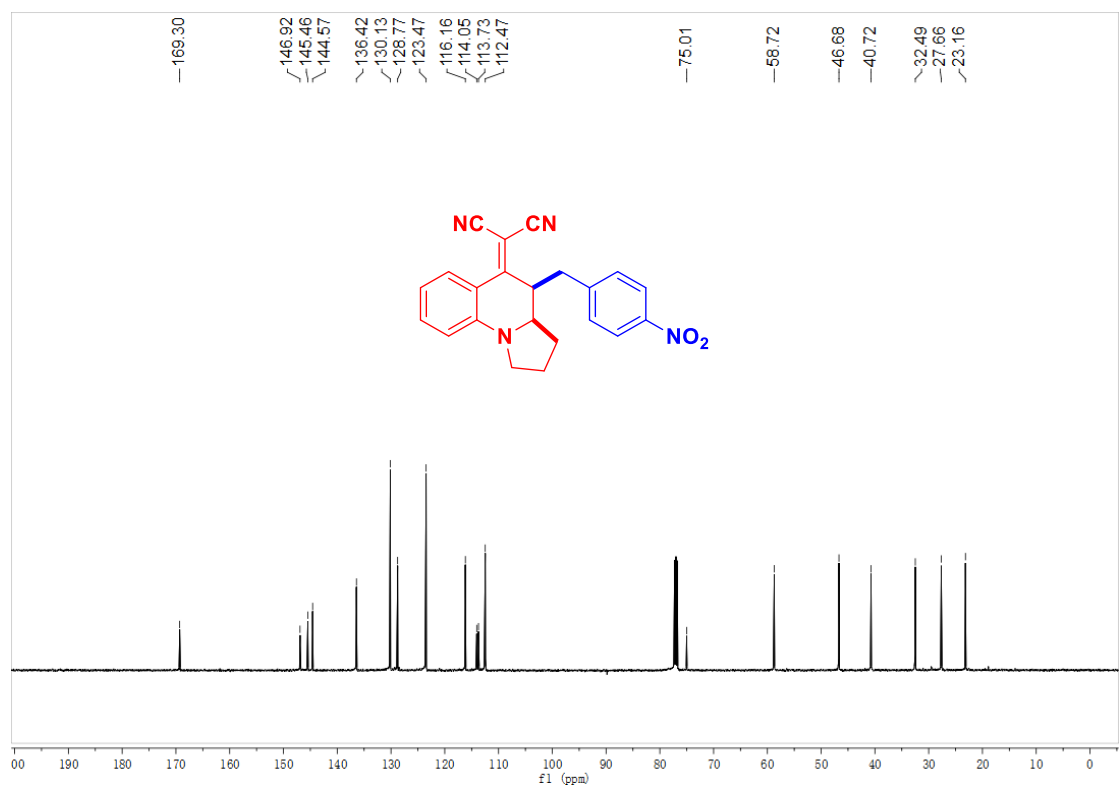

**2-((3*aR*,4*R*)-4-(2-nitrobenzyl)-2,3,3*a*,4-tetrahydropyrrolo[1,2-*a*]quinolin-5(1*H*)-ylidene)malononitrile 3n**

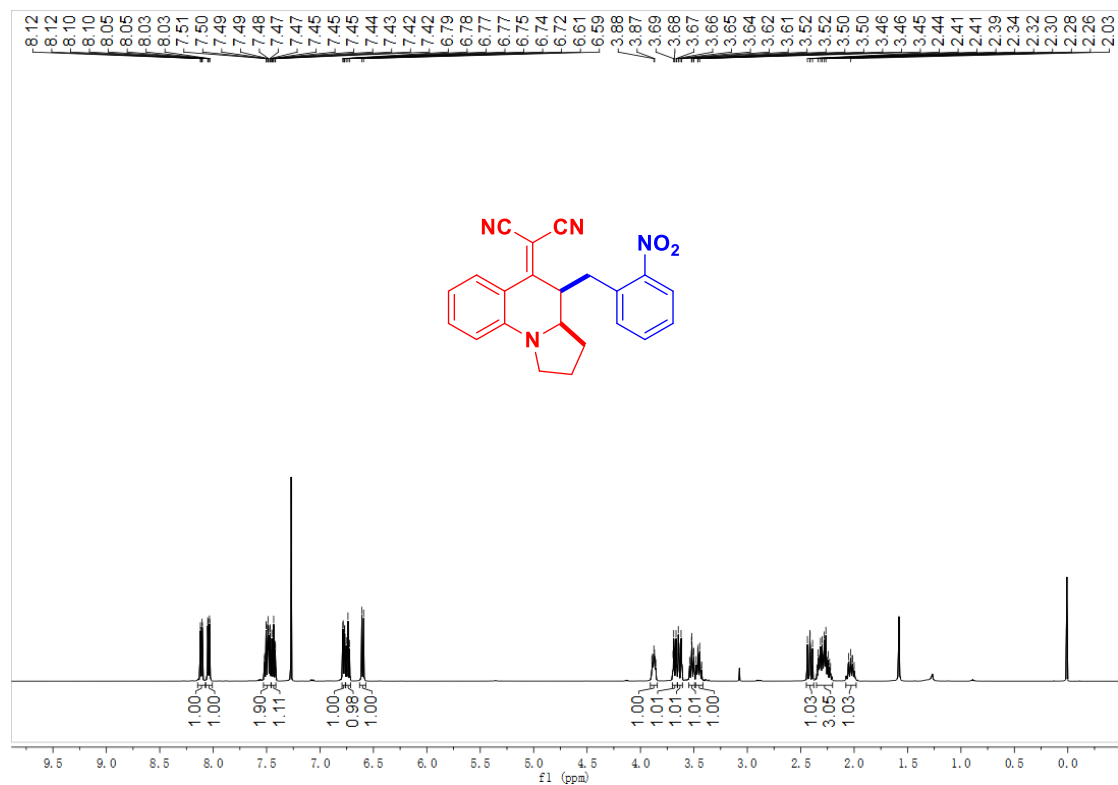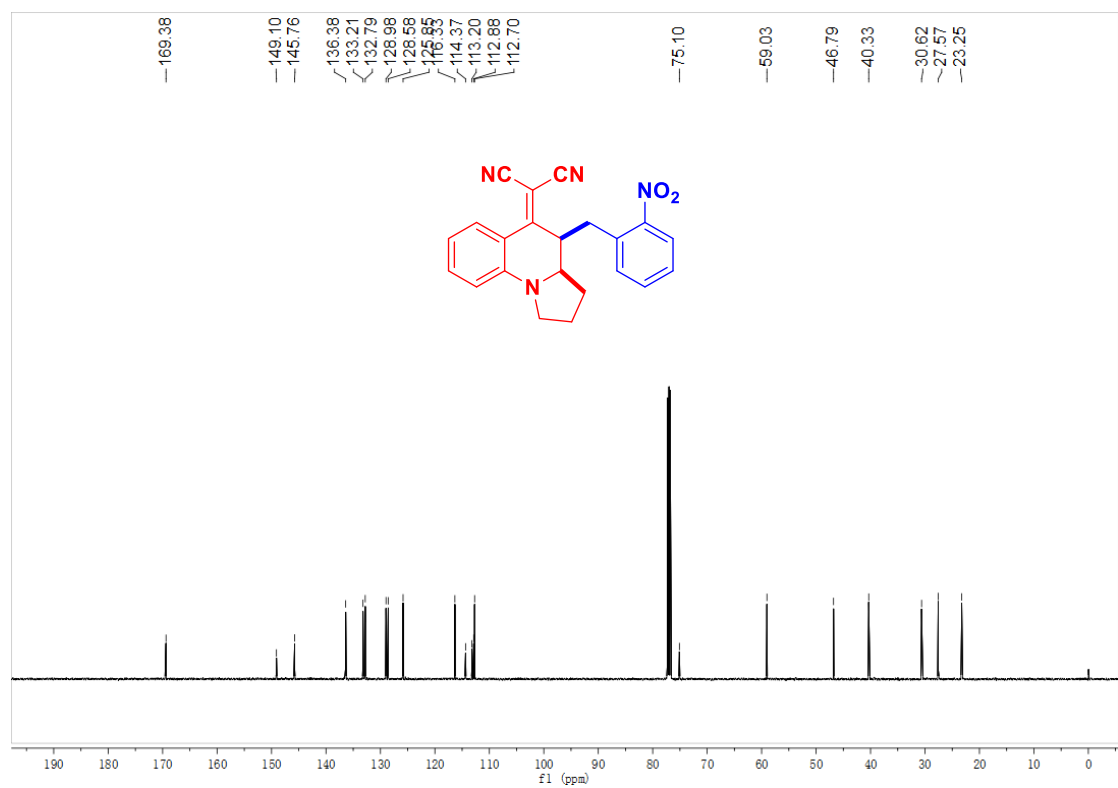

**2-((3*aR*,4*R*)-8-methoxy-4-(4-(trifluoromethyl)benzyl)-2,3,3*a*,4-tetrahydropyrrolo[1,2-*α*]quinolin-5(1*H*)-ylidene)malononitrile 3o**

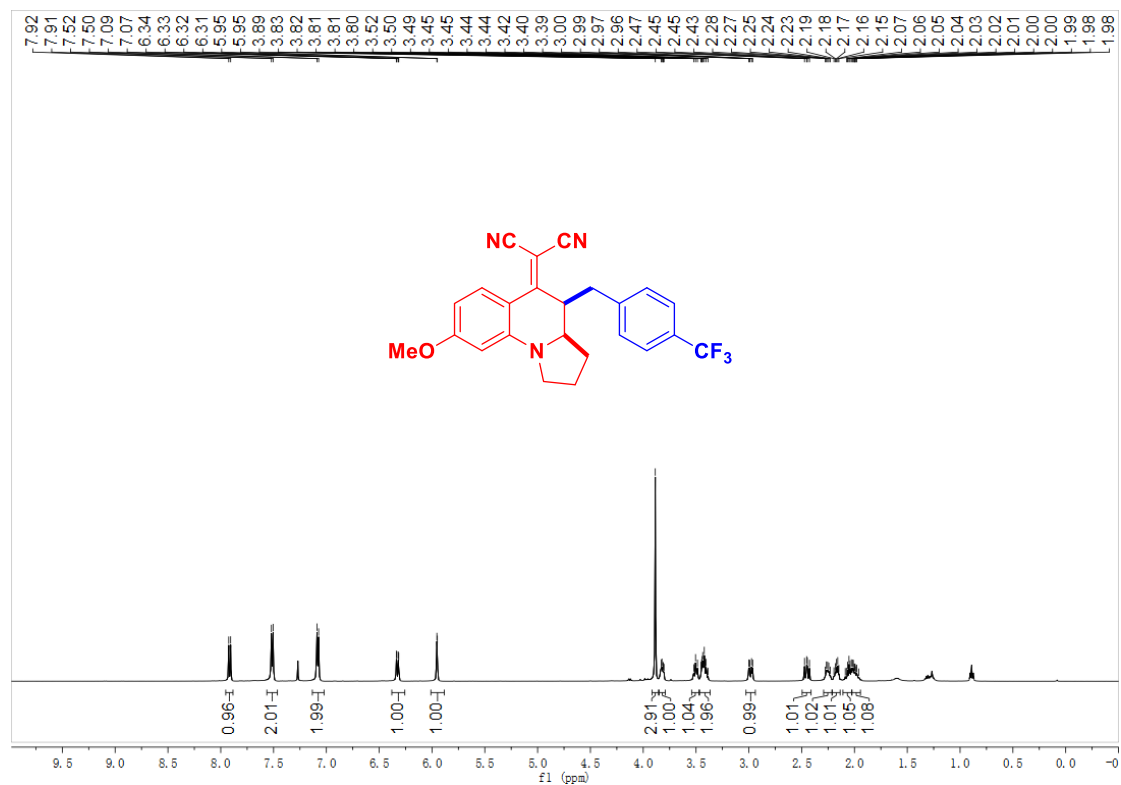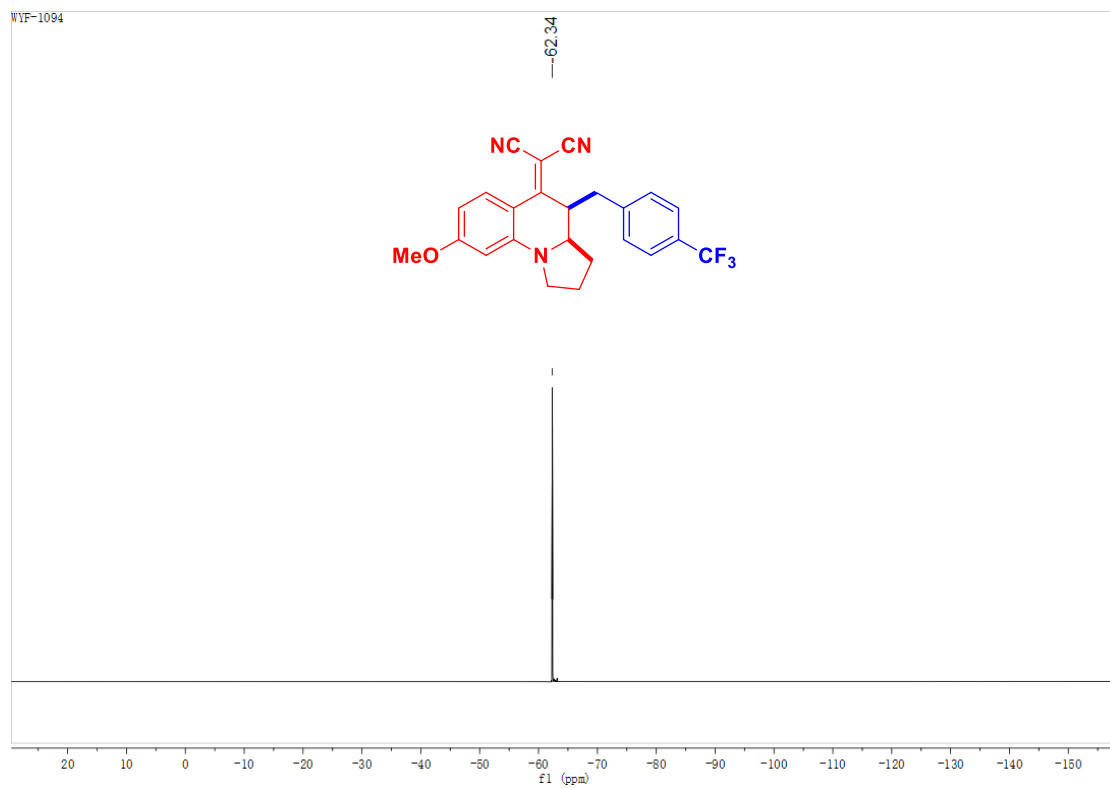

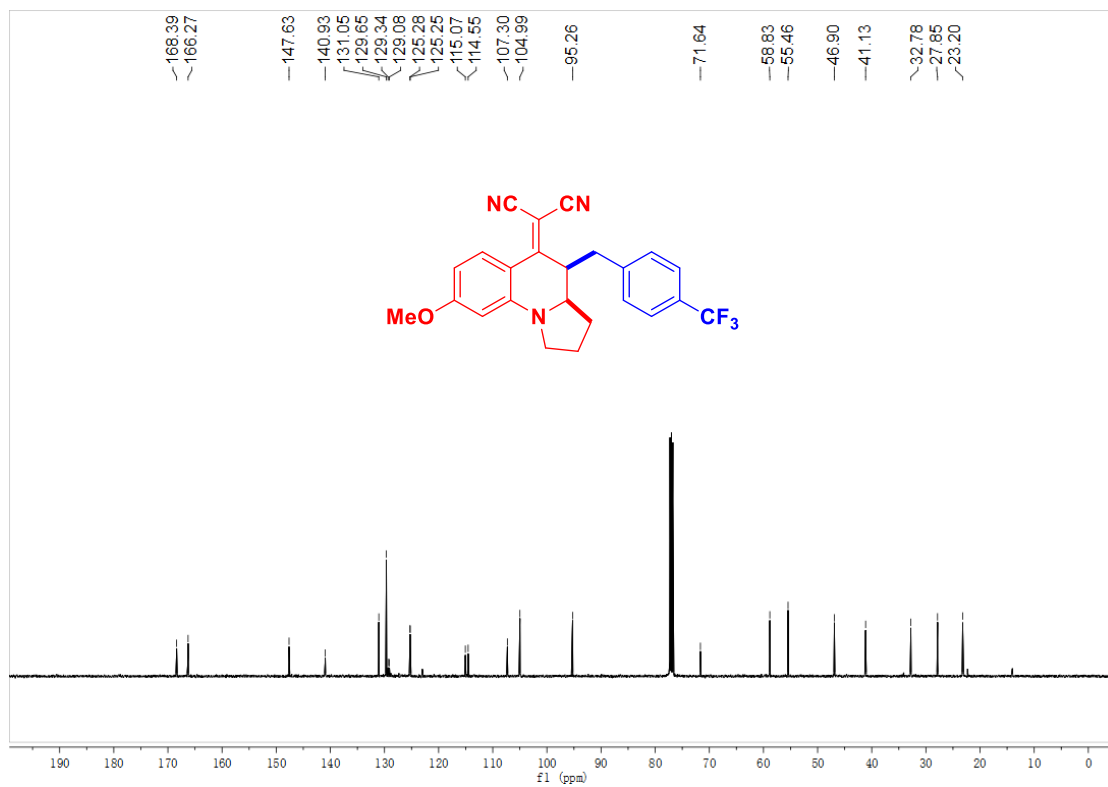

**2-((3aR,4R)-8-methoxy-4-(4-nitrobenzyl)-2,3,3a,4-tetrahydropyrrolo[1,2- $\alpha$ ]quinolin-5(1H)-ylidene)malononitrile 3p**

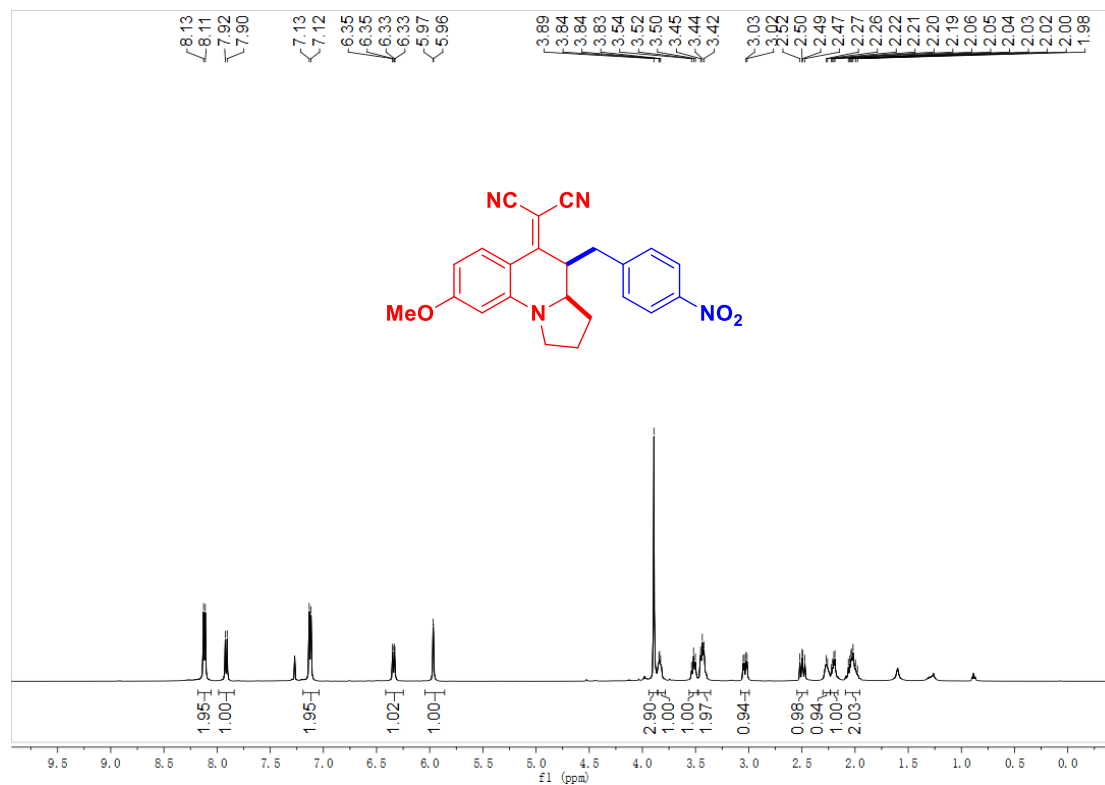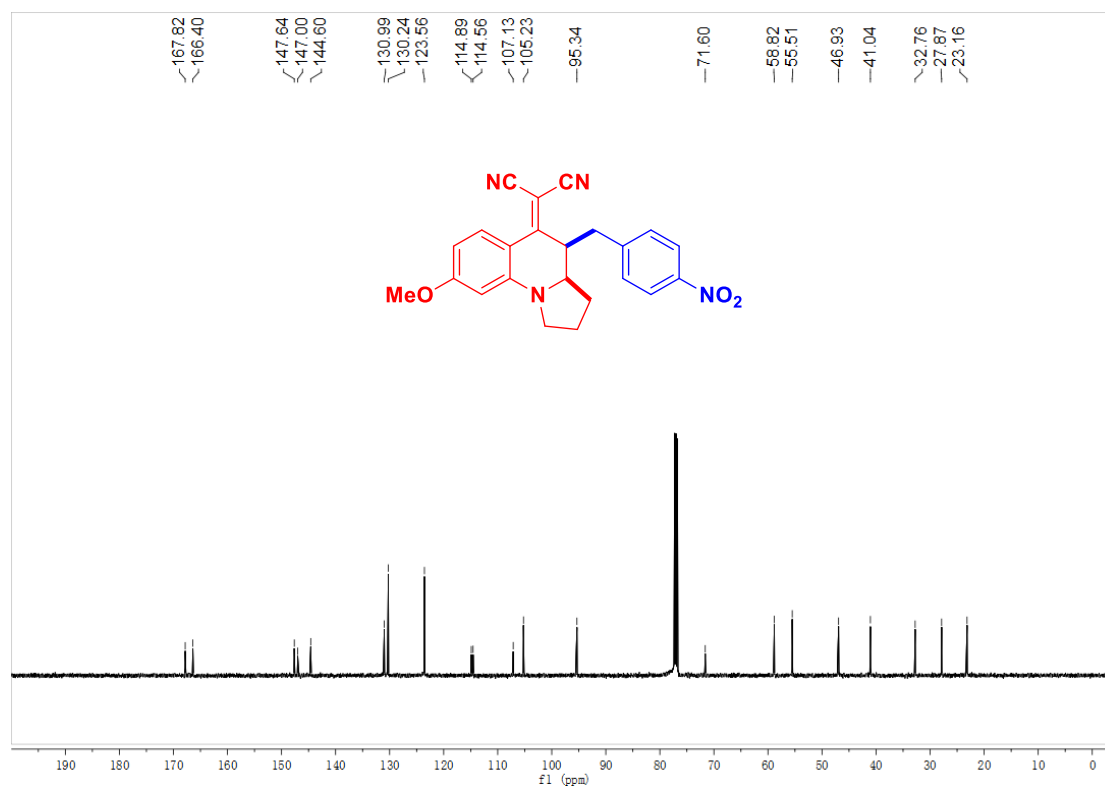



**2-((3a*R*,4*R*)-4-benzyl-7-fluoro-2,3,3a,4-tetrahydropyrrolo[1,2-*α*]quinolin-5(1*H*)-ylidene)malononitrile 3q**

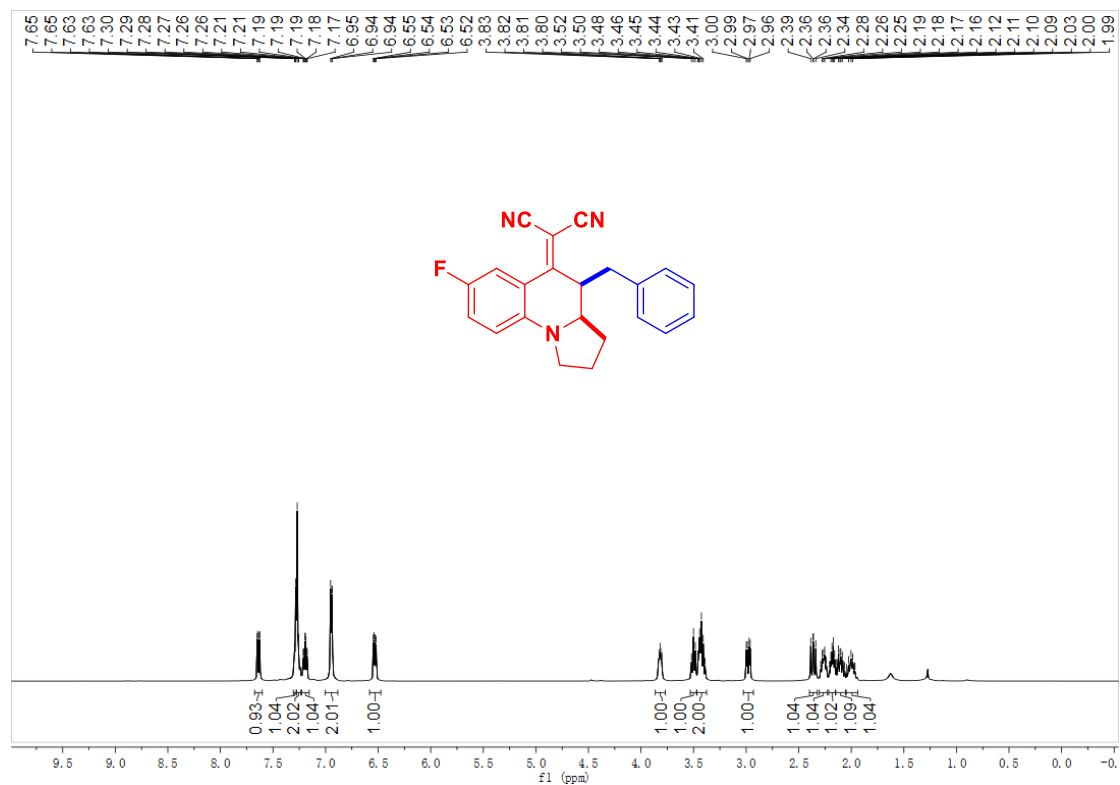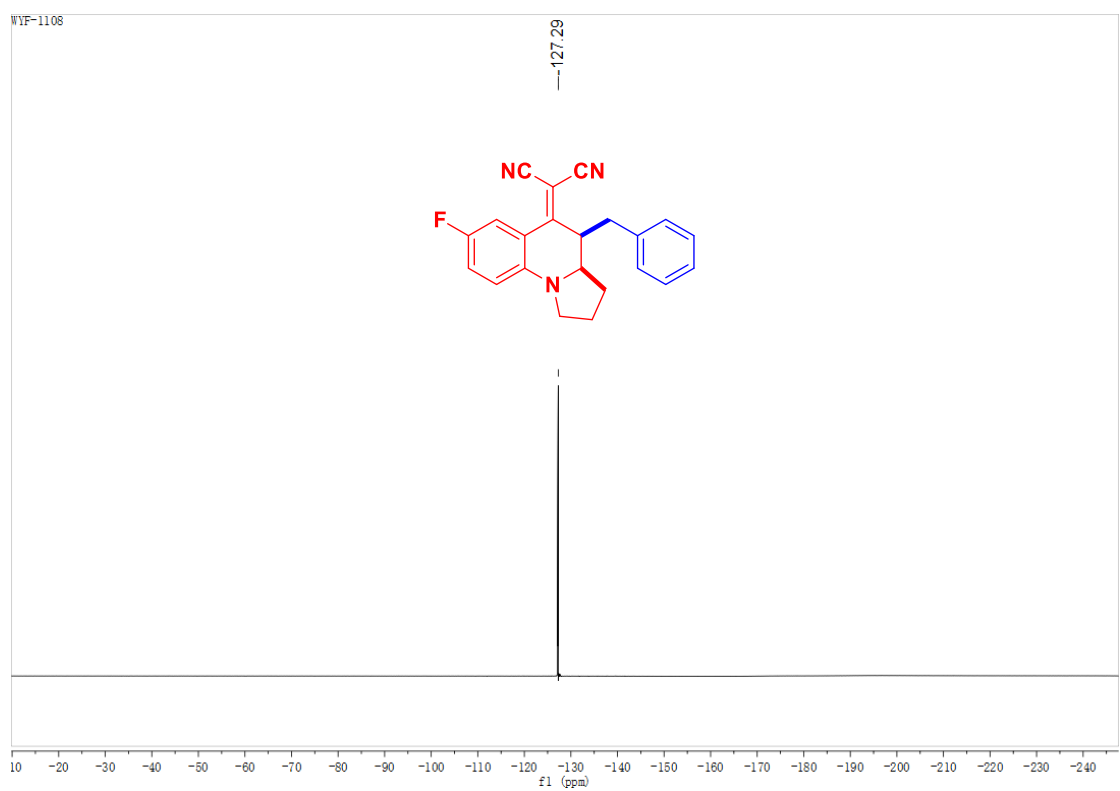

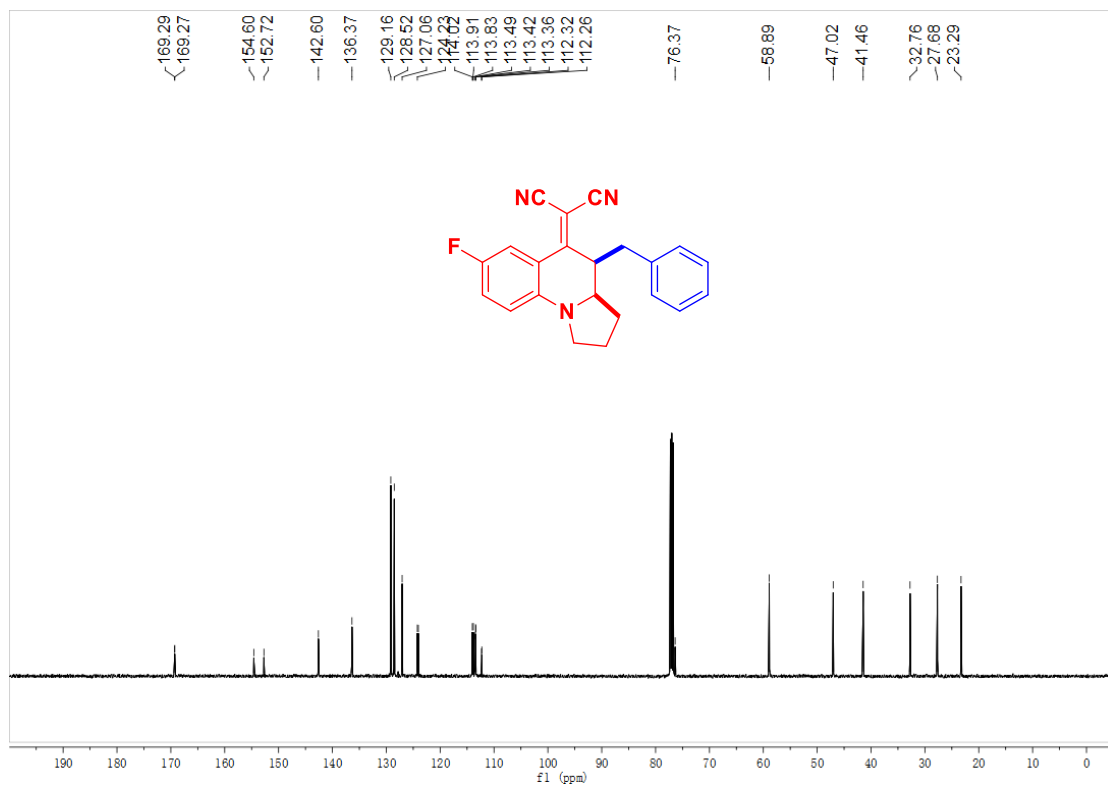

**2-((3*aR*,4*R*)-6-fluoro-4-(4-(trifluoromethyl)benzyl)-2,3,3*a*,4-tetrahydropyrrolo[1,2-*a*]quinolin-5(1*H*)-ylidene)malononitrile 3r**

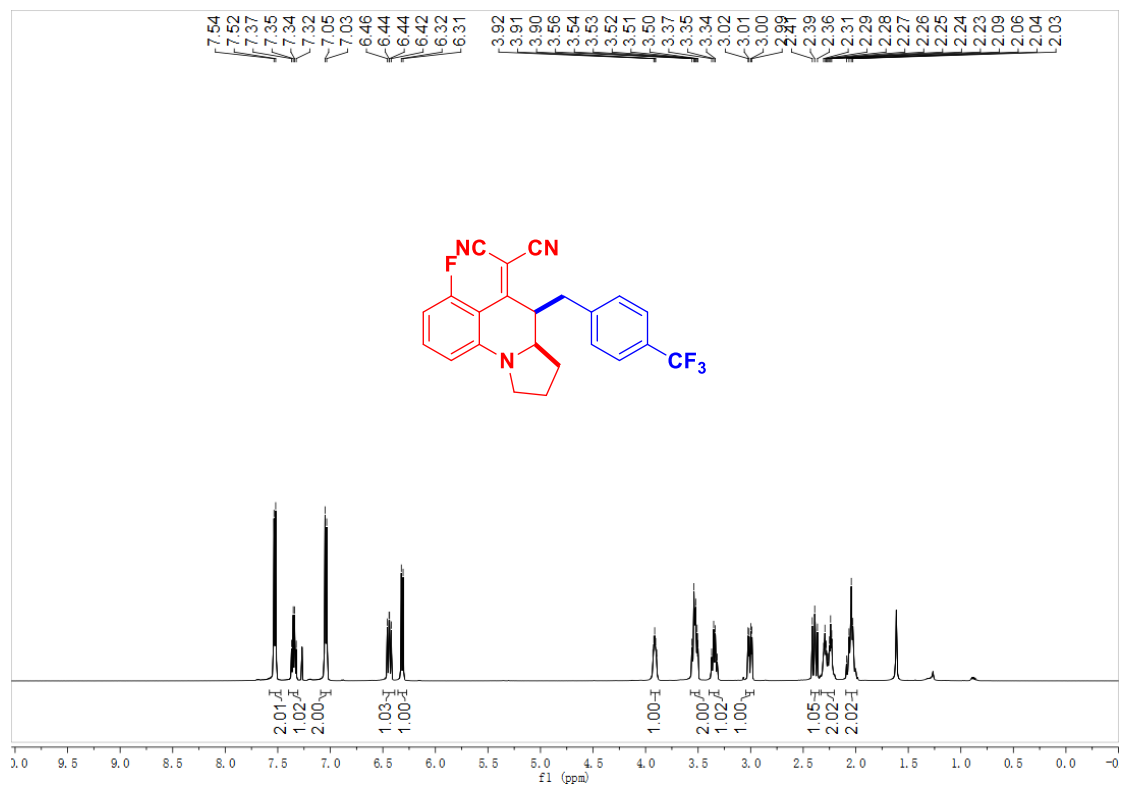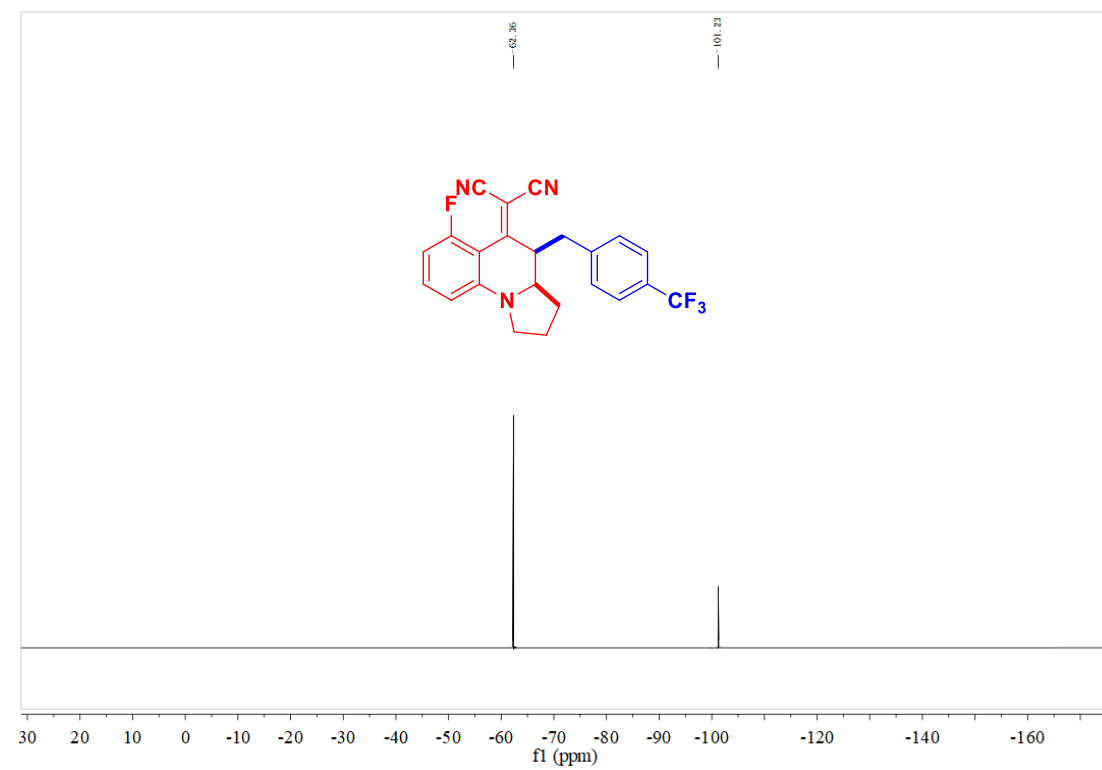

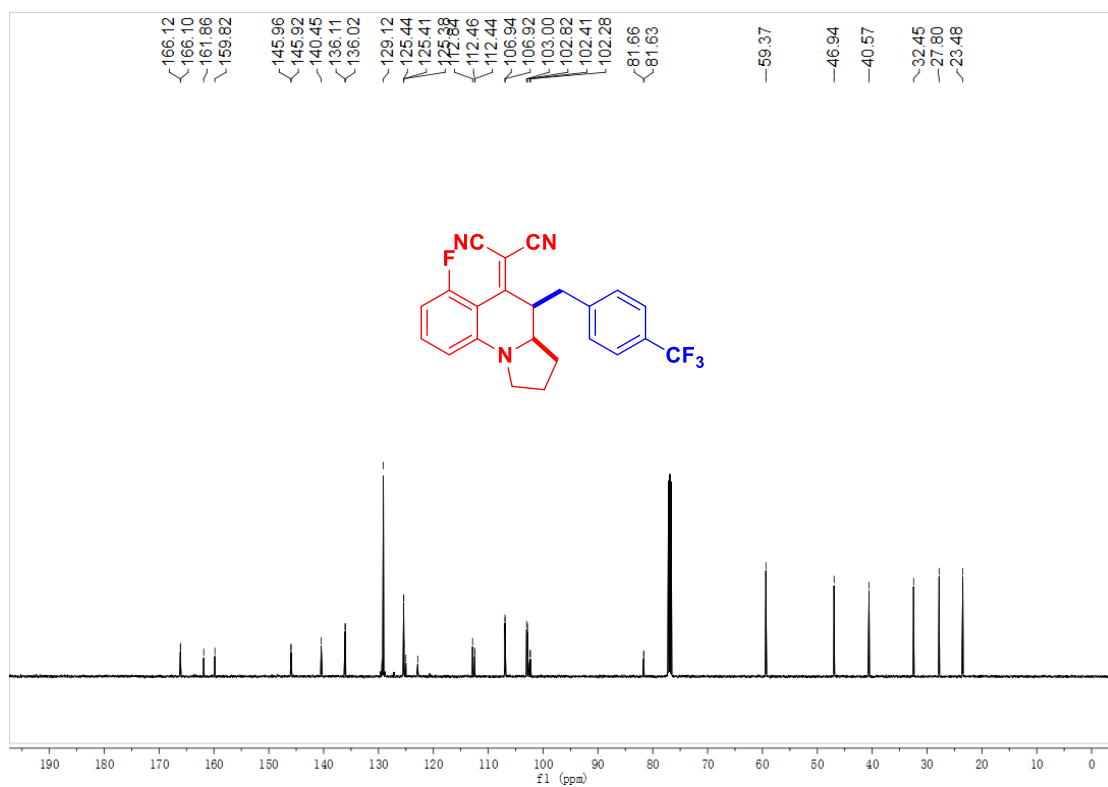

2-((3a*R*,4*R*)-4-benzyl-7-bromo-2,3,3a,4-tetrahydropyrrolo[1,2-*a*]quinolin-5(1*H*)-ylidene)malononitrile **3s**

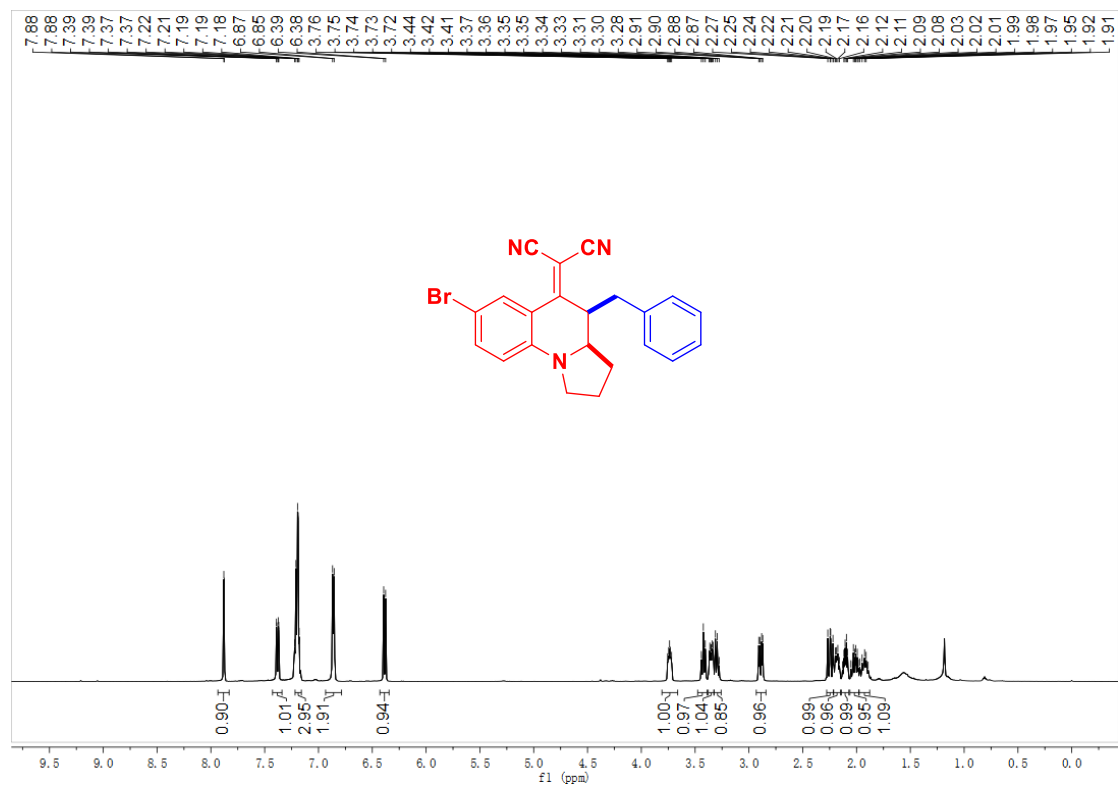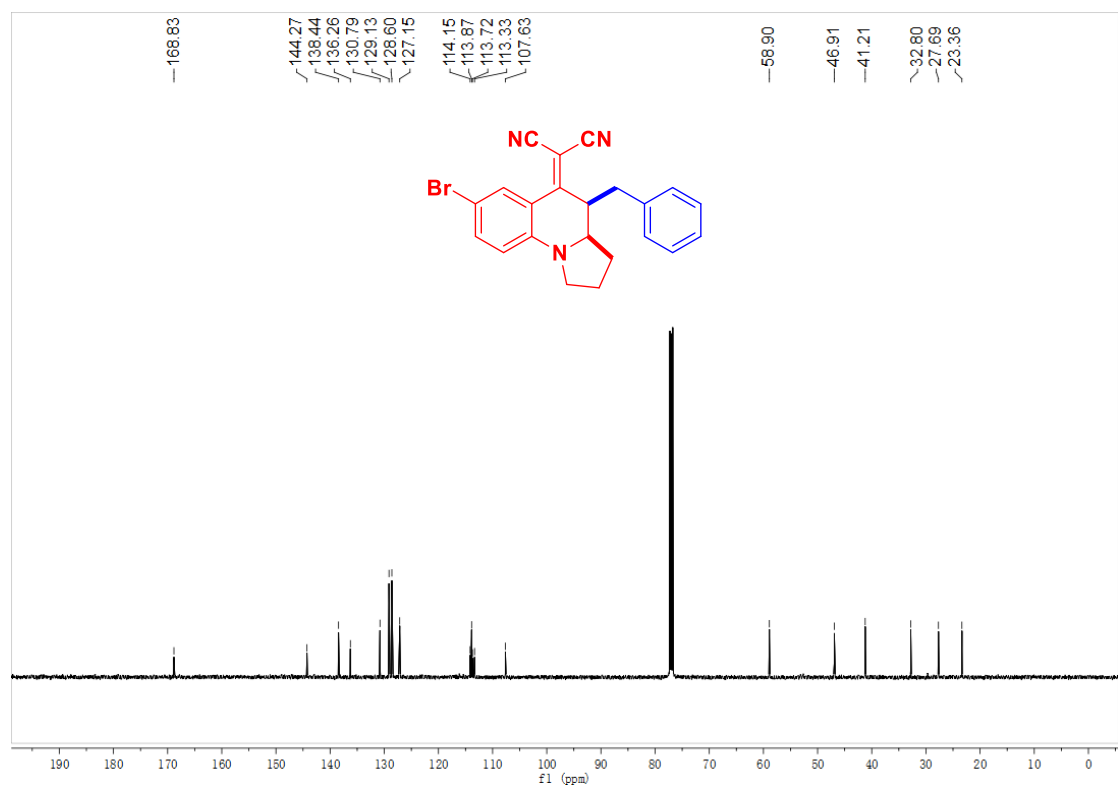

2-((6*R*,6*aR*,6*bS*)-6-(4-(trifluoromethyl)benzyl)-6*a*,6*b*,7,8,9,10,10*a*,11-octahydroisindolo[2,1- $\alpha$ ]quinolin-5(6*H*)-ylidene)malononitrile **3t**

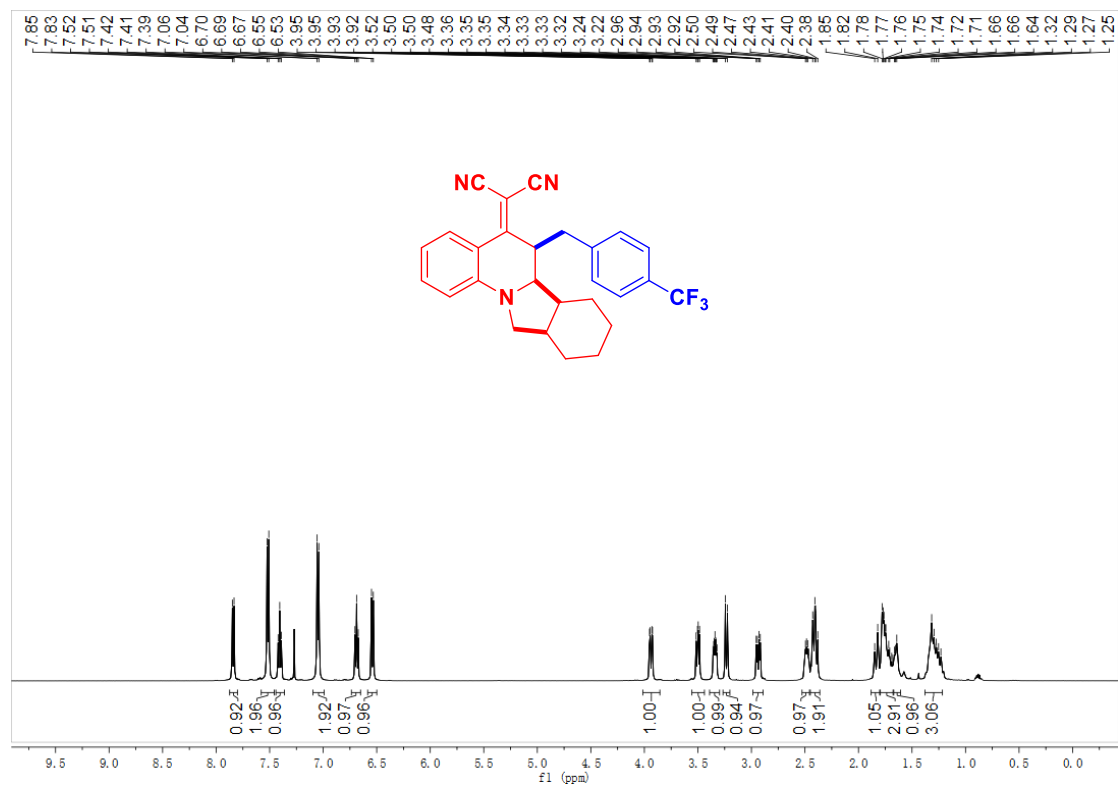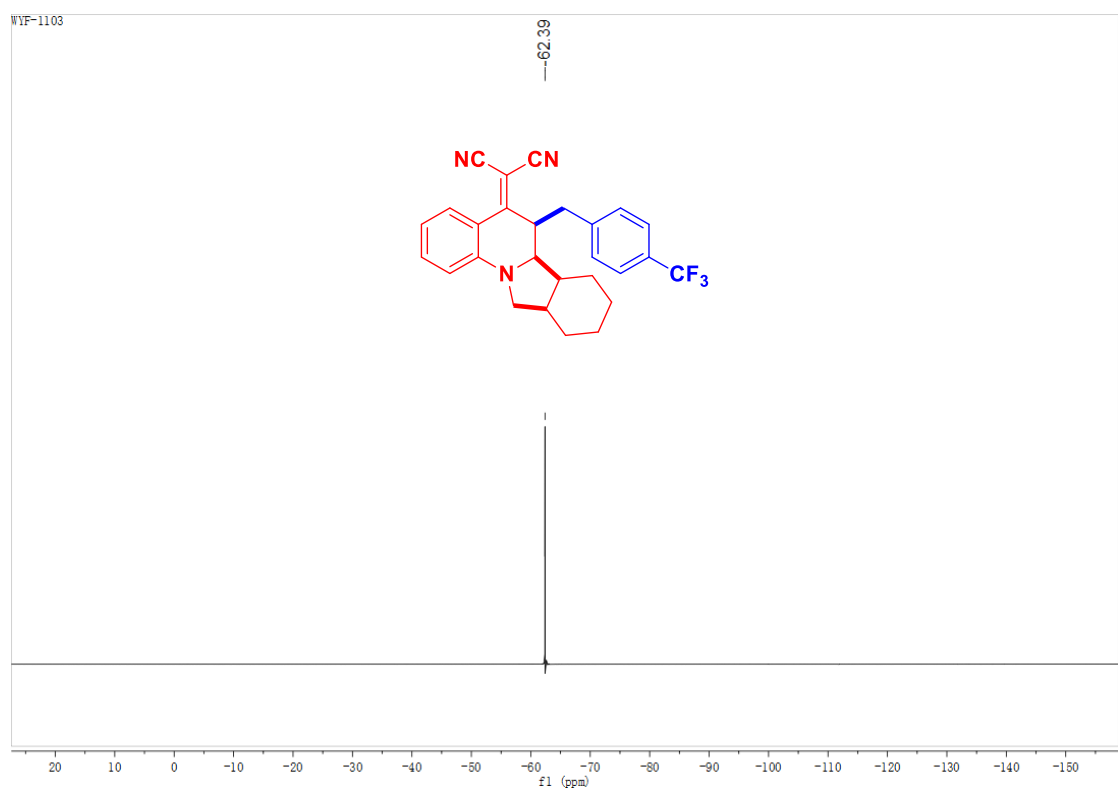

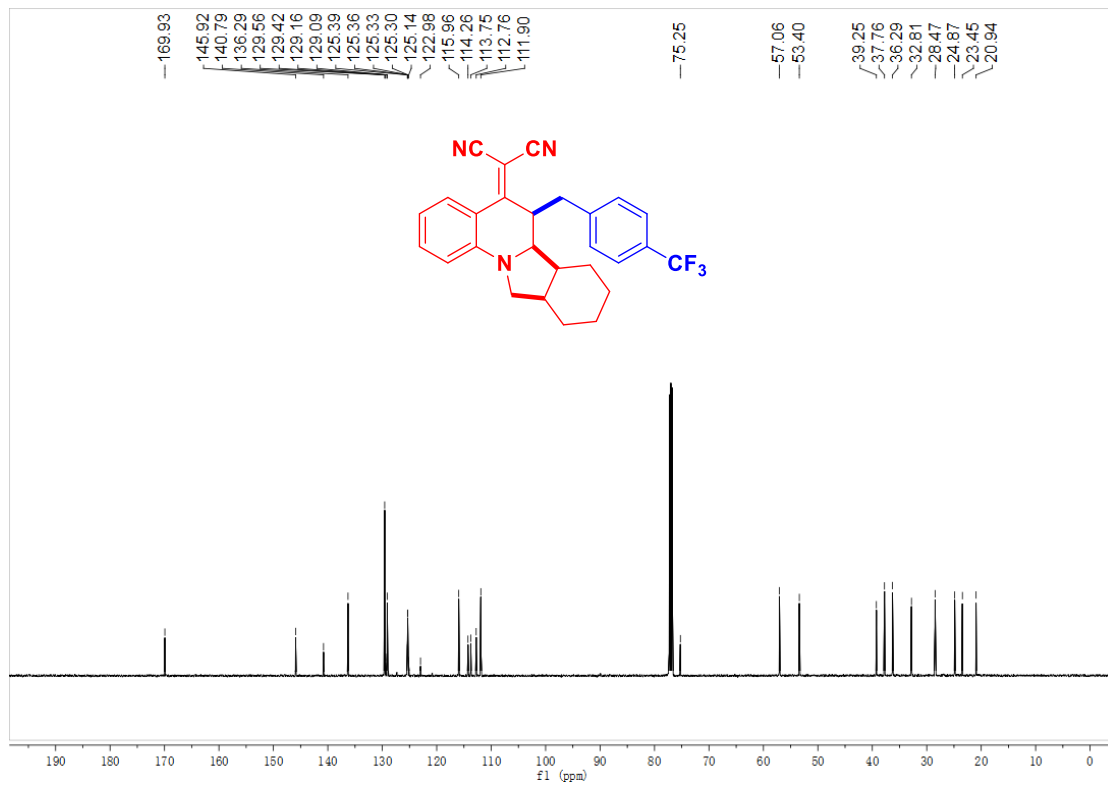

**2-((5*R*)-5-(4-(trifluoromethyl)benzyl)-1,2,3,4,5-hexahydro-6*H*-pyrido[1,2-*a*]quinolin-6-ylidene)malononitrile 3u**

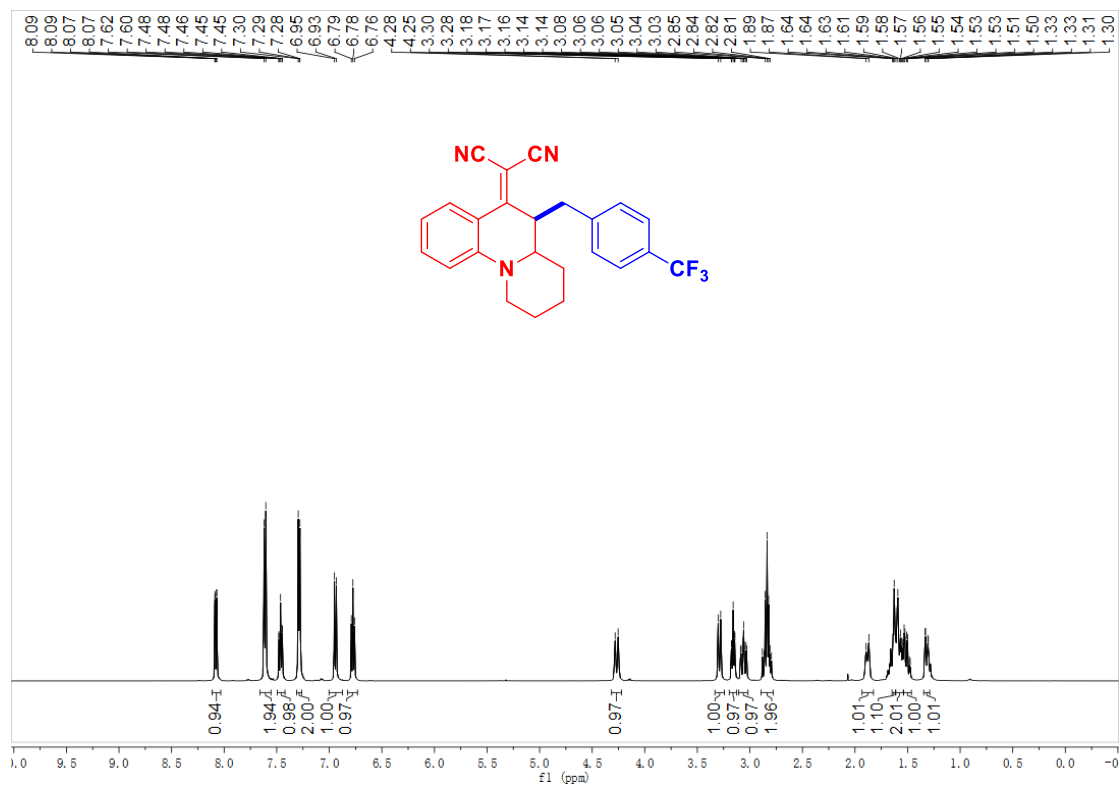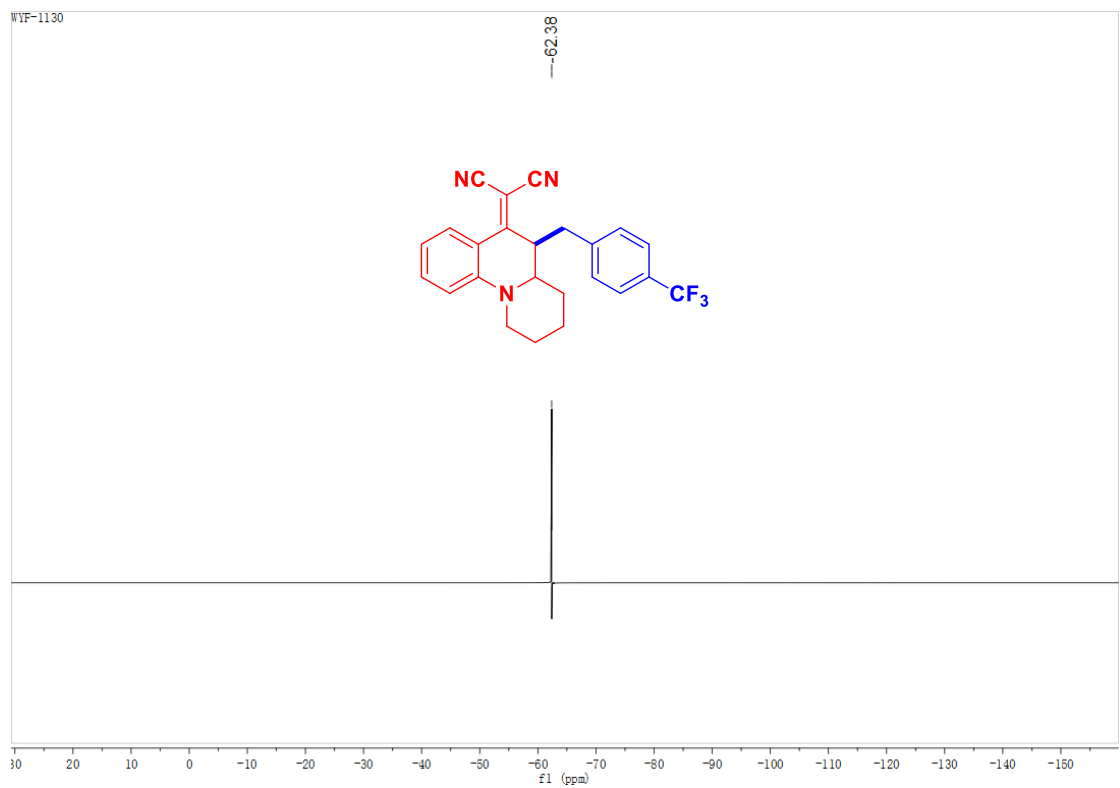



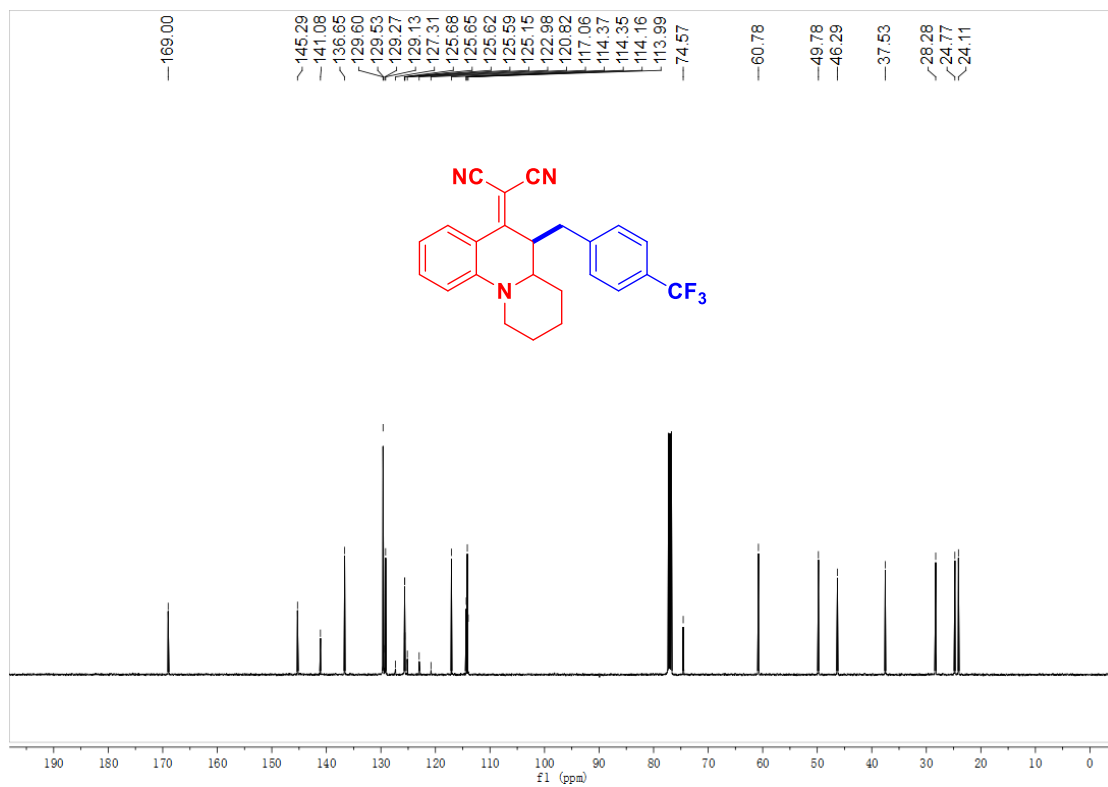

2-((2*S*,3*R*)-1-benzyl-2-phenyl-3-(4-(trifluoromethyl)benzyl)-2,3-dihydroquinolin-4(1*H*)-ylidene)malononitrile **3v**

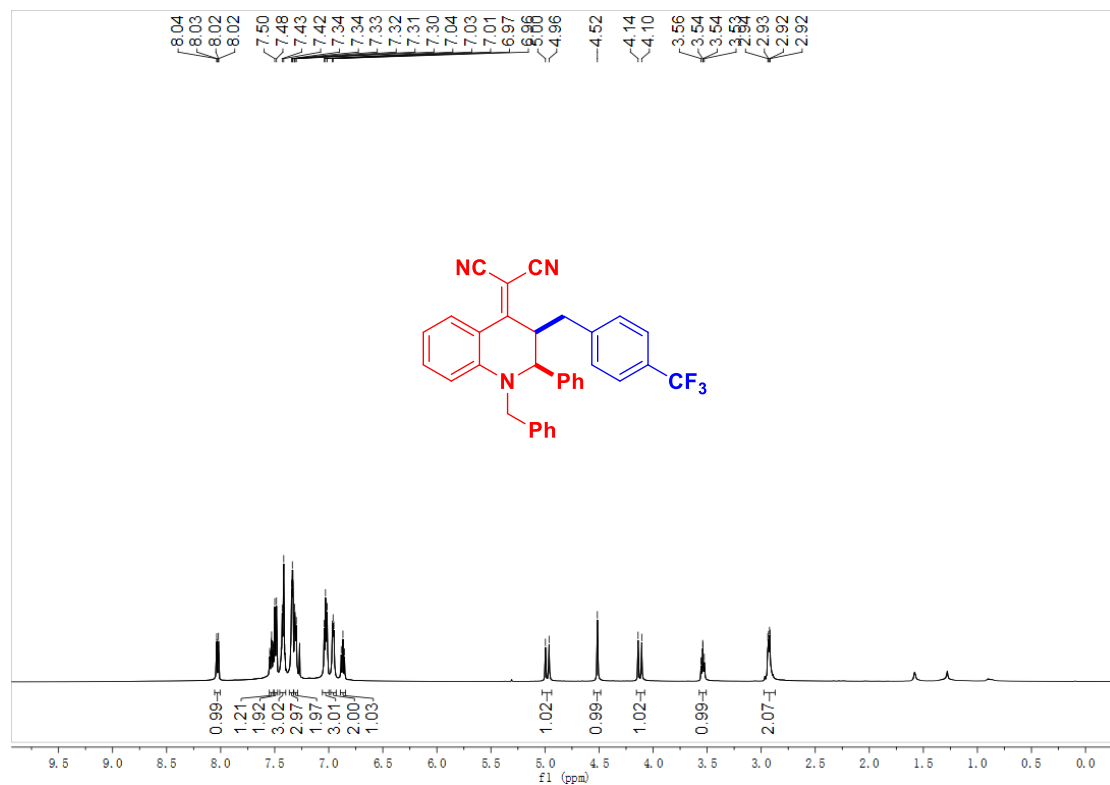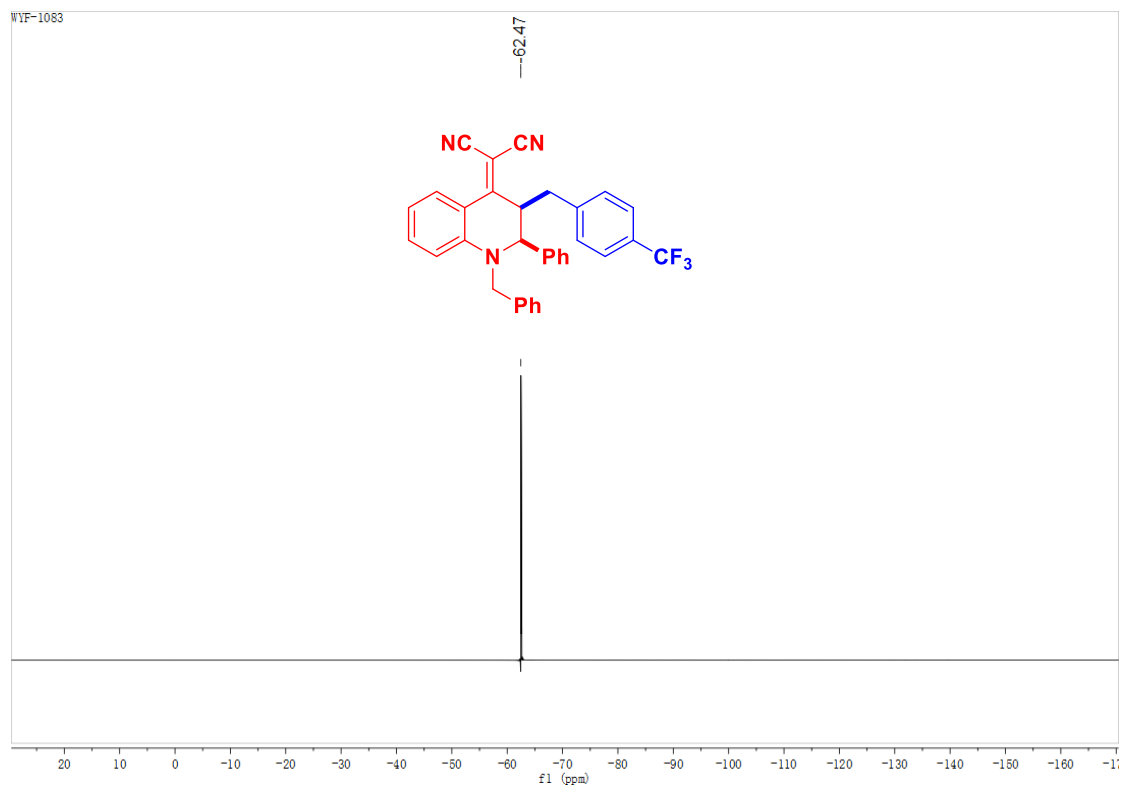

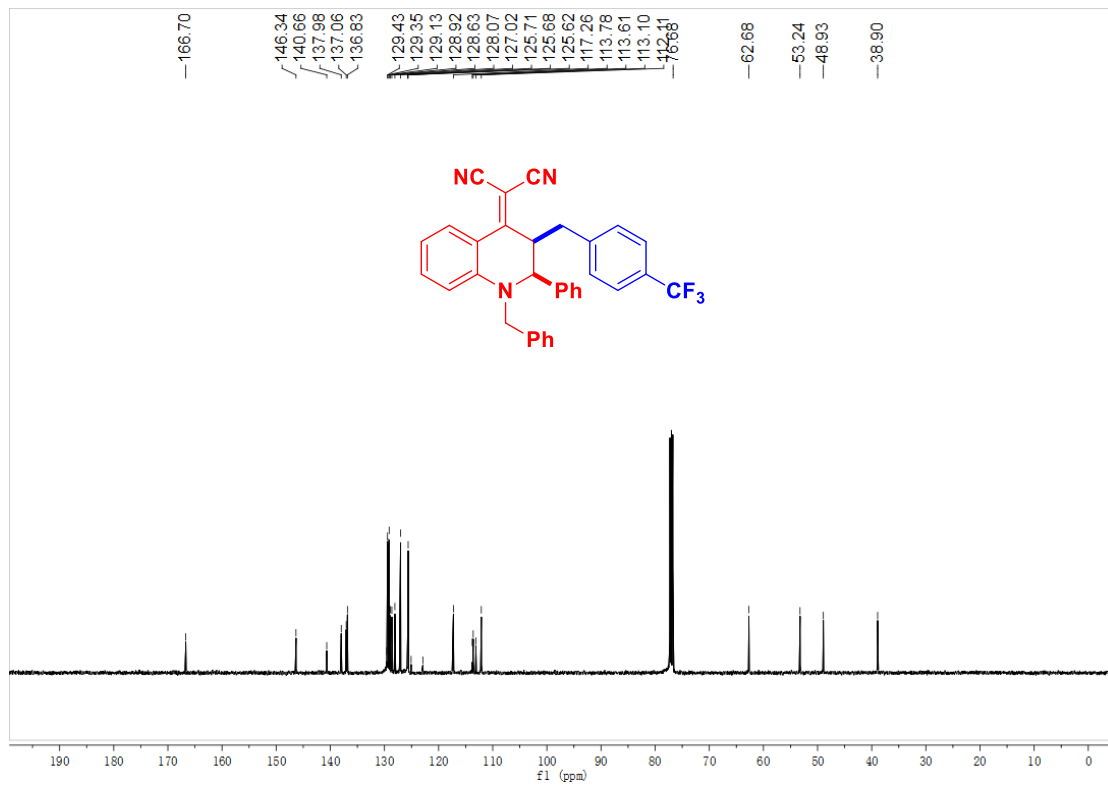

**2-((2*S*,3*R*)-1-methyl-2-phenyl-3-(4-(trifluoromethyl)benzyl)-2,3-dihydroquinolin-4(1*H*)-ylidene)malononitrile 3w**

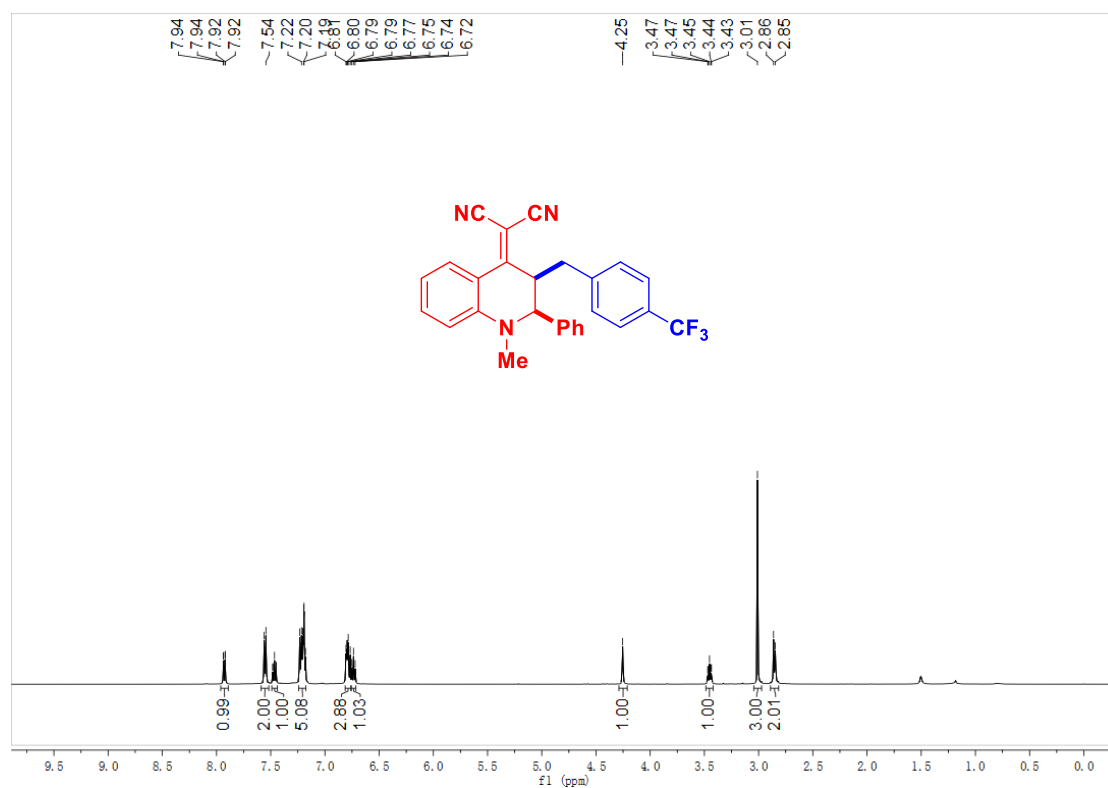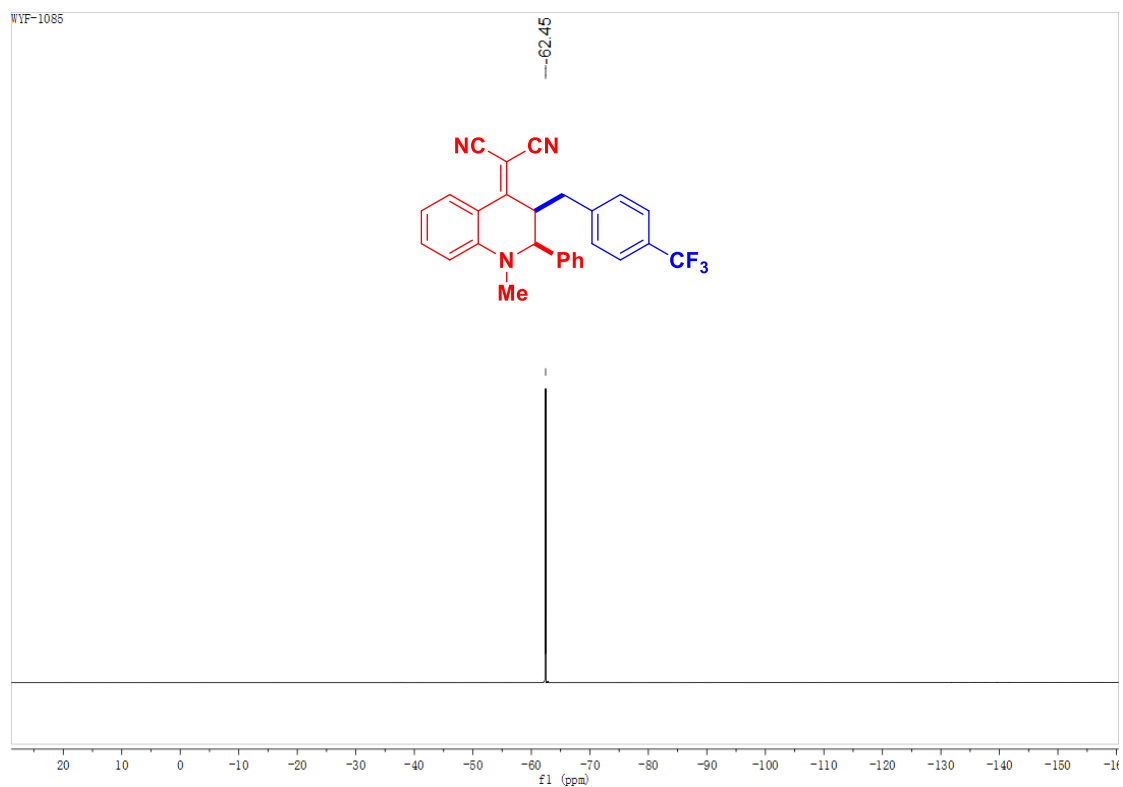

WVF-1085

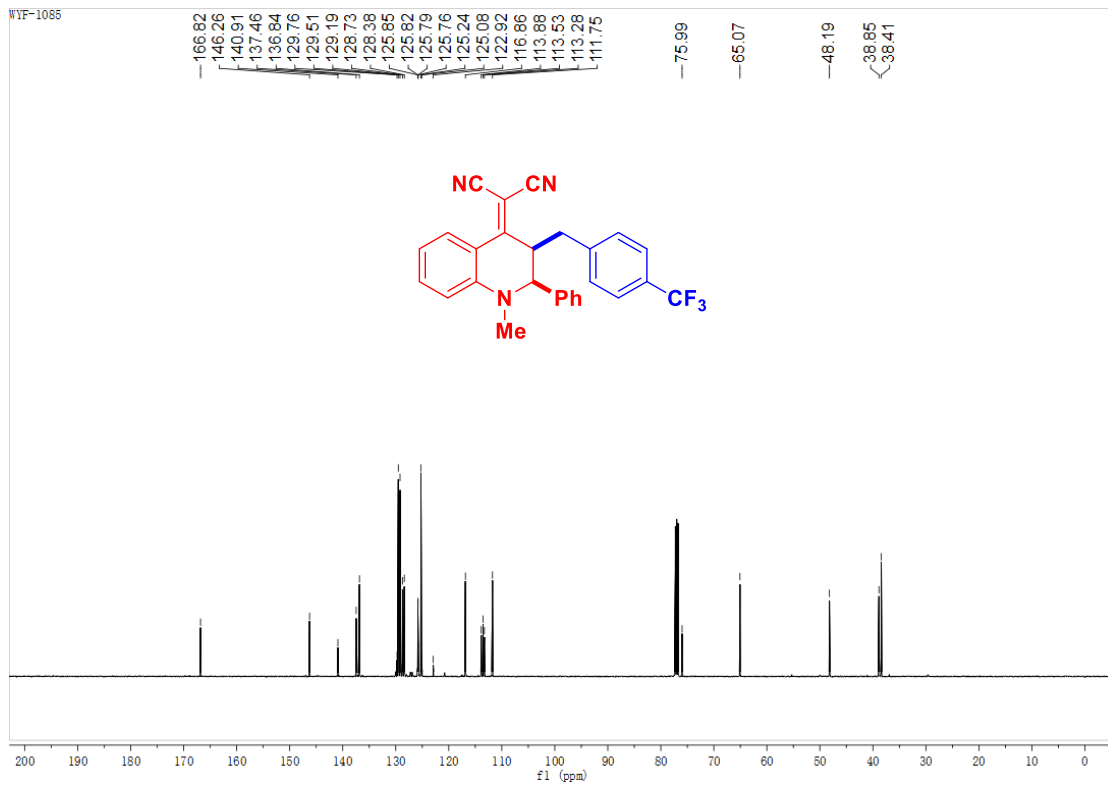

2-((2*R*,3*R*)-3-benzyl-1-ethyl-2-methyl-2,3-dihydroquinolin-4(1*H*)-ylidene)malononitrile **3x**

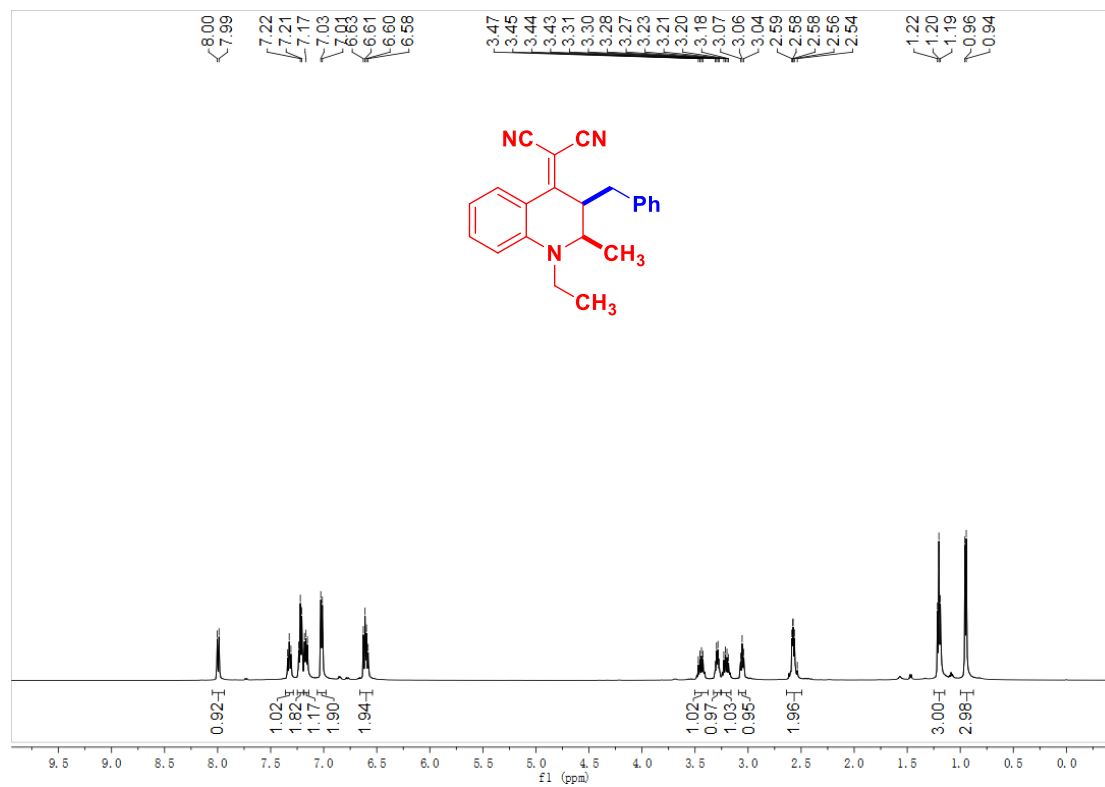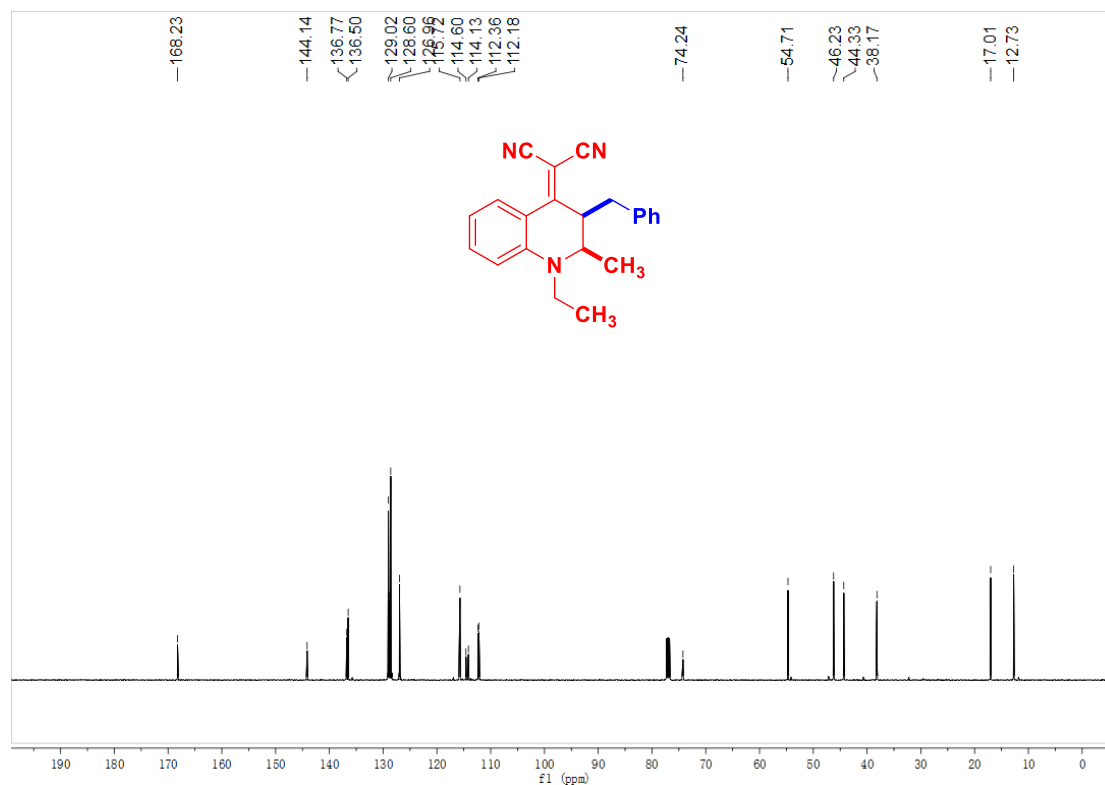

**2-((3*aR*,4*R*)-4-(furan-2-ylmethyl)-2,3,3*a*,4-tetrahydropyrrolo[1,2-*a*]quinolin-5(1*H*)-ylidene)malononitrile 5a**

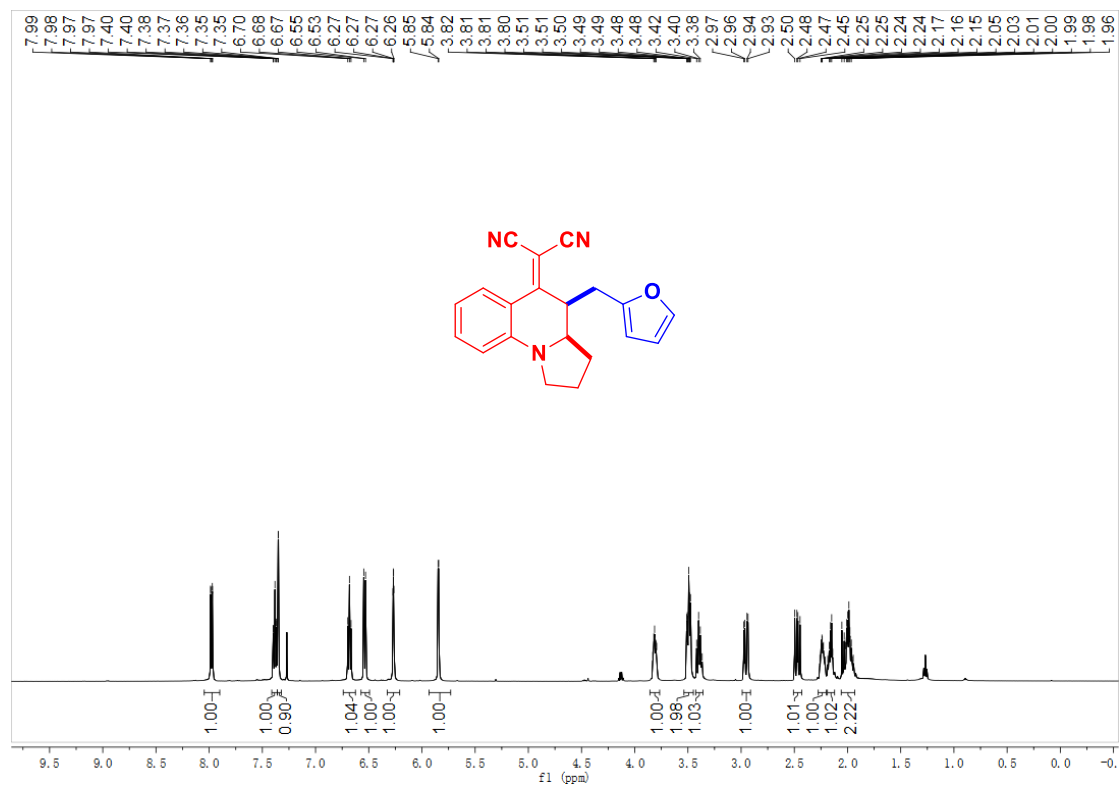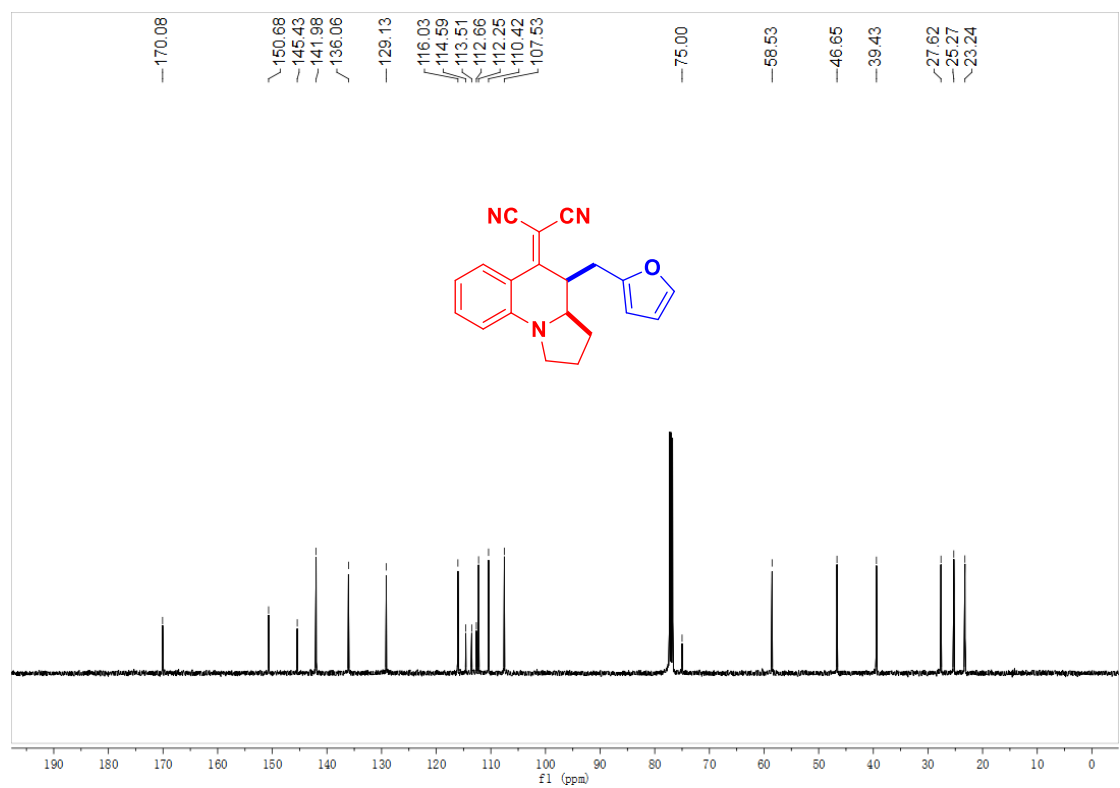

**2-((2*S*,3*R*)-1-benzyl-3-(furan-2-ylmethyl)-2-phenyl-2,3-dihydroquinolin-4(1*H*)-ylidene)malononitrile 5b**

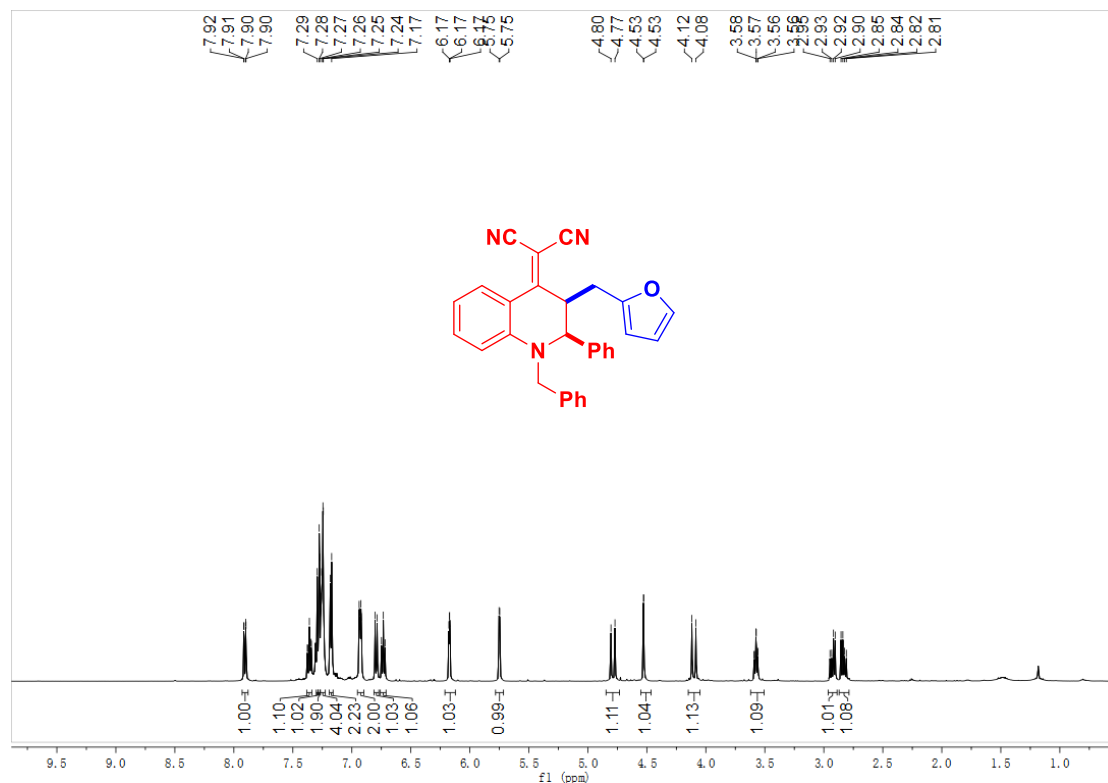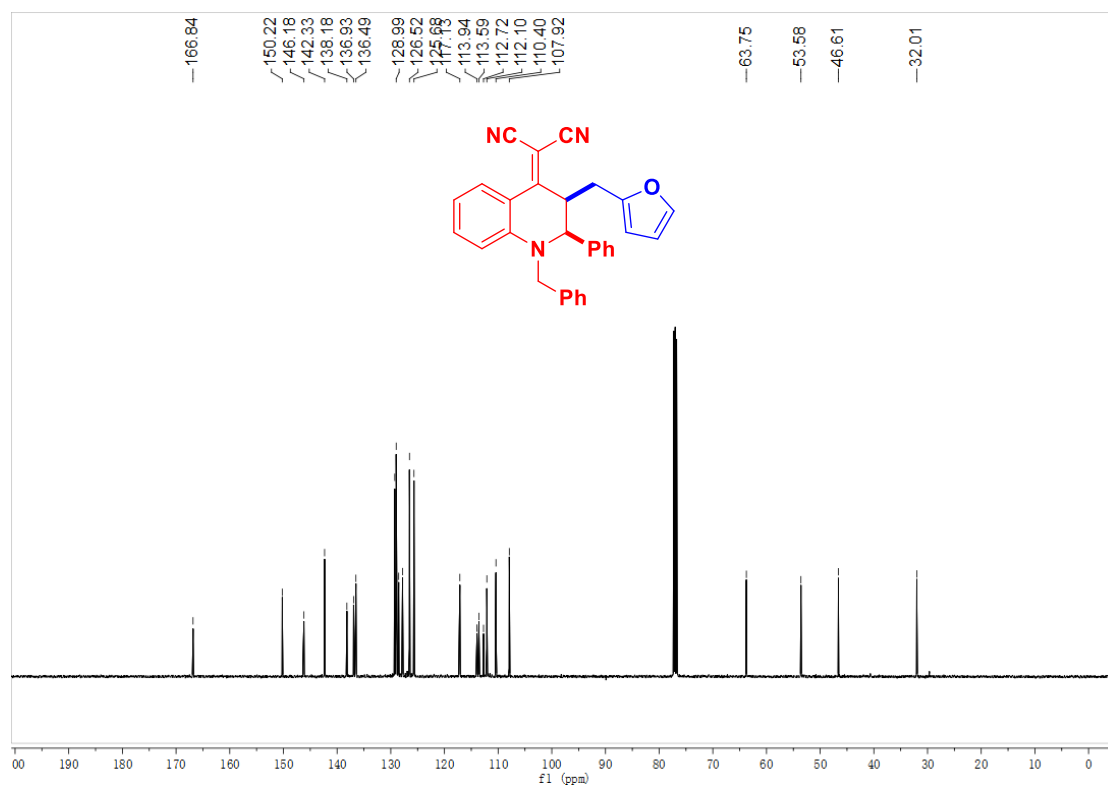



**2-((3a*R*,4*R*)-7-fluoro-4-(furan-2-ylmethyl)-2,3,3a,4-tetrahydropyrrolo[1,2-*a*]quinolin-5(1*H*)-ylidene)malononitrile 5c**

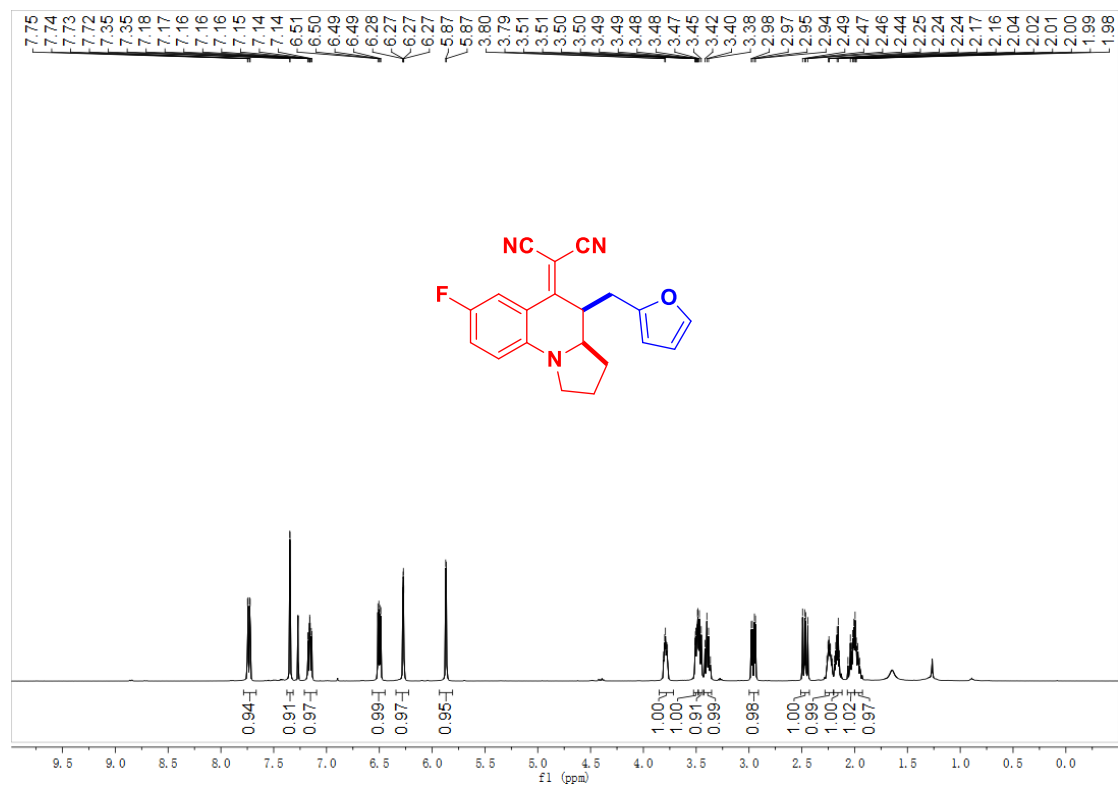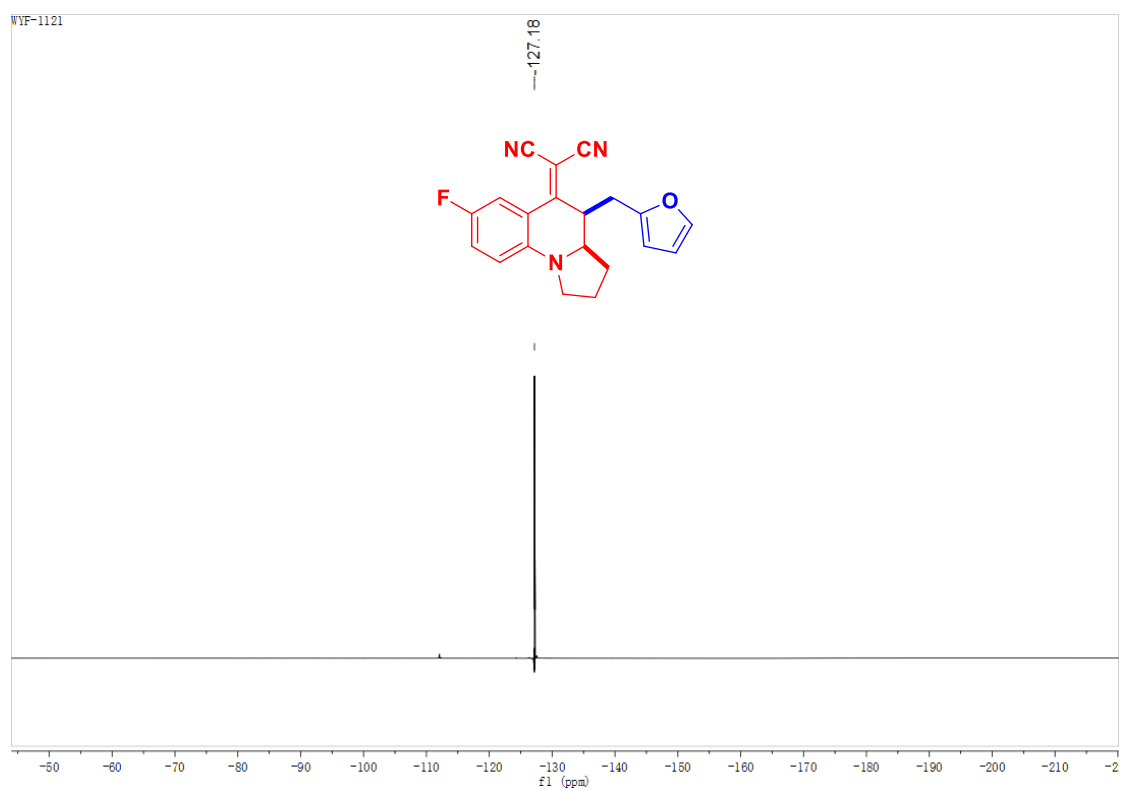

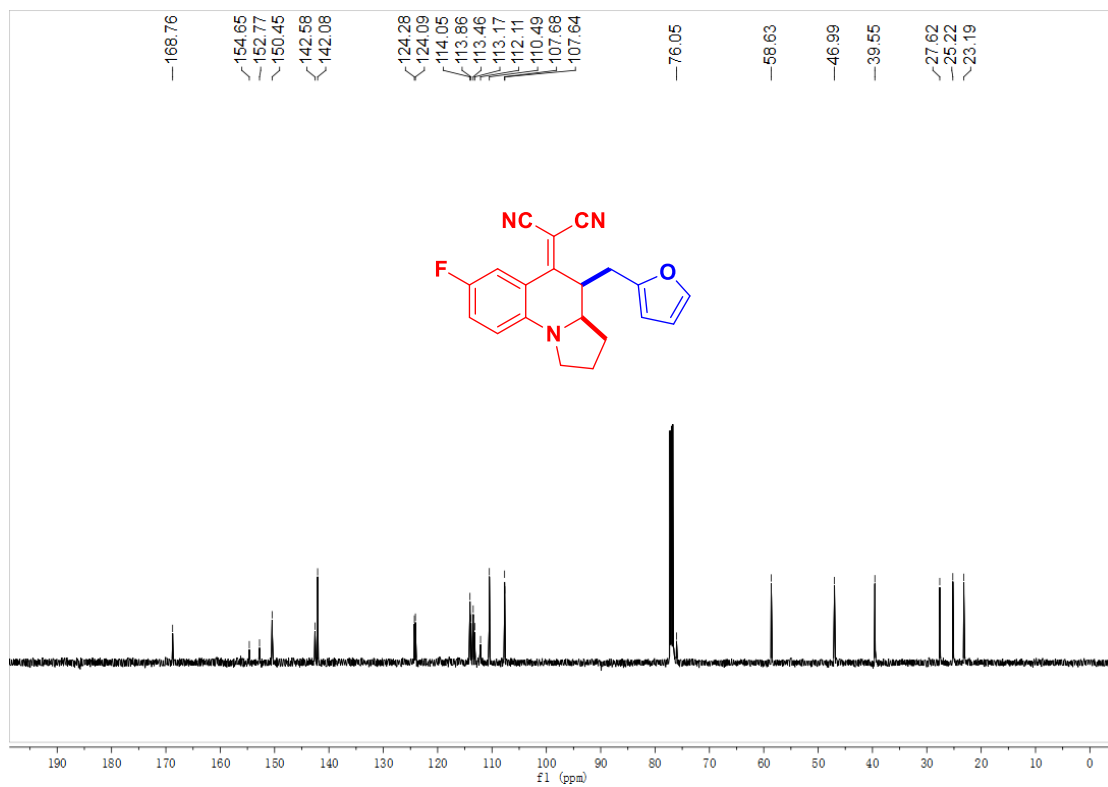

**2-((3a*R*,4*R*)-4-(furan-2-ylmethyl)-8-methoxy-2,3,3a,4-tetrahydropyrrolo[1,2-*a*]quinolin-5(1*H*)-ylidene)malononitrile 5d**

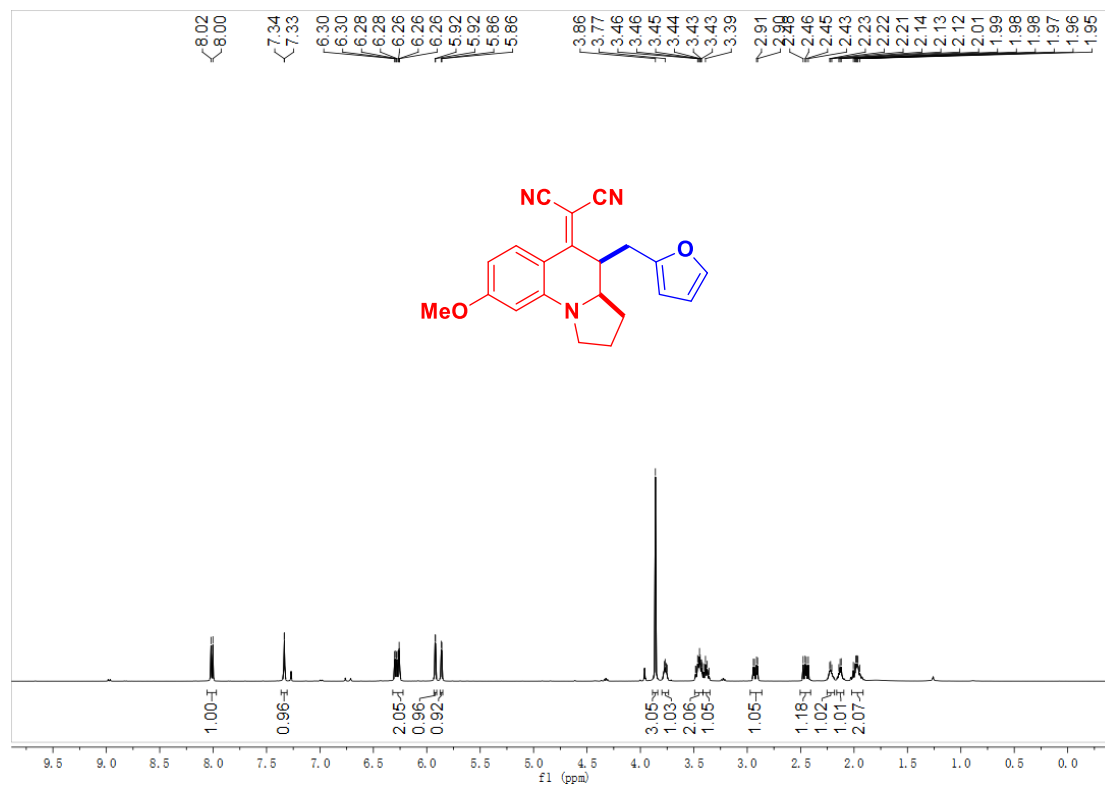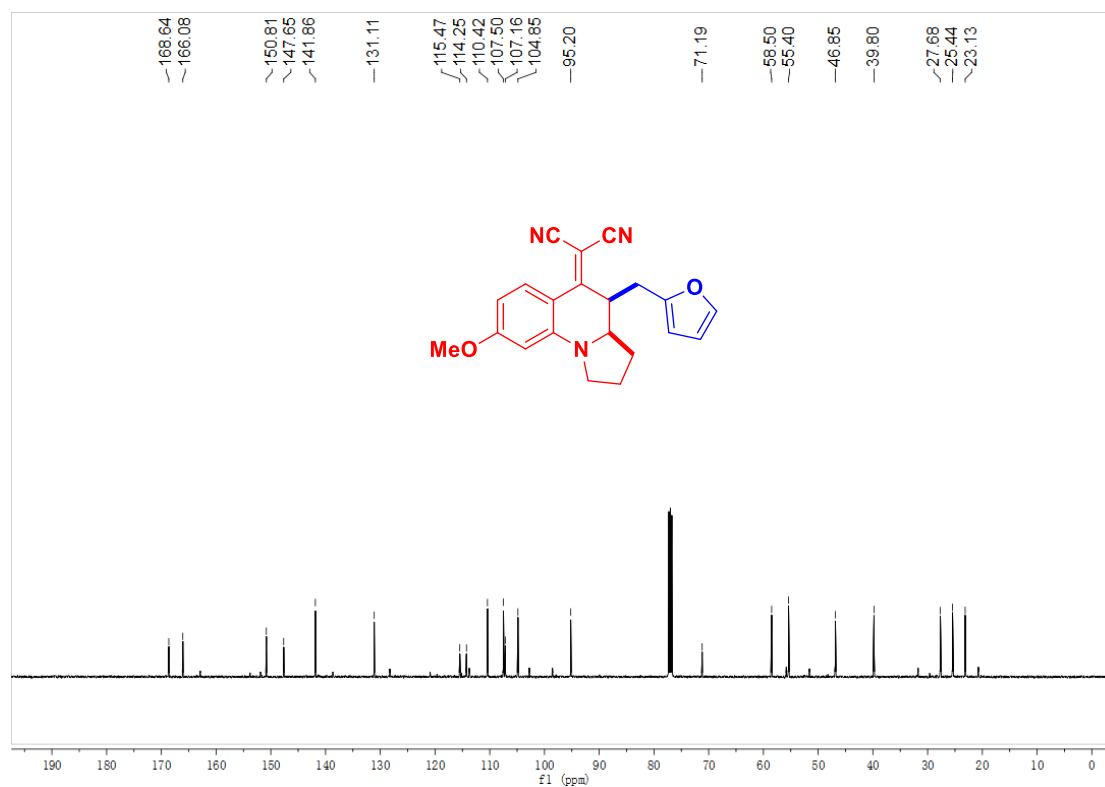

**2-((3*aR*,4*R*)-4-(thiophen-2-ylmethyl)-2,3,3*a*,4-tetrahydropyrrolo[1,2-*a*]quinolin-5(1*H*)-ylidene)malononitrile 5e**

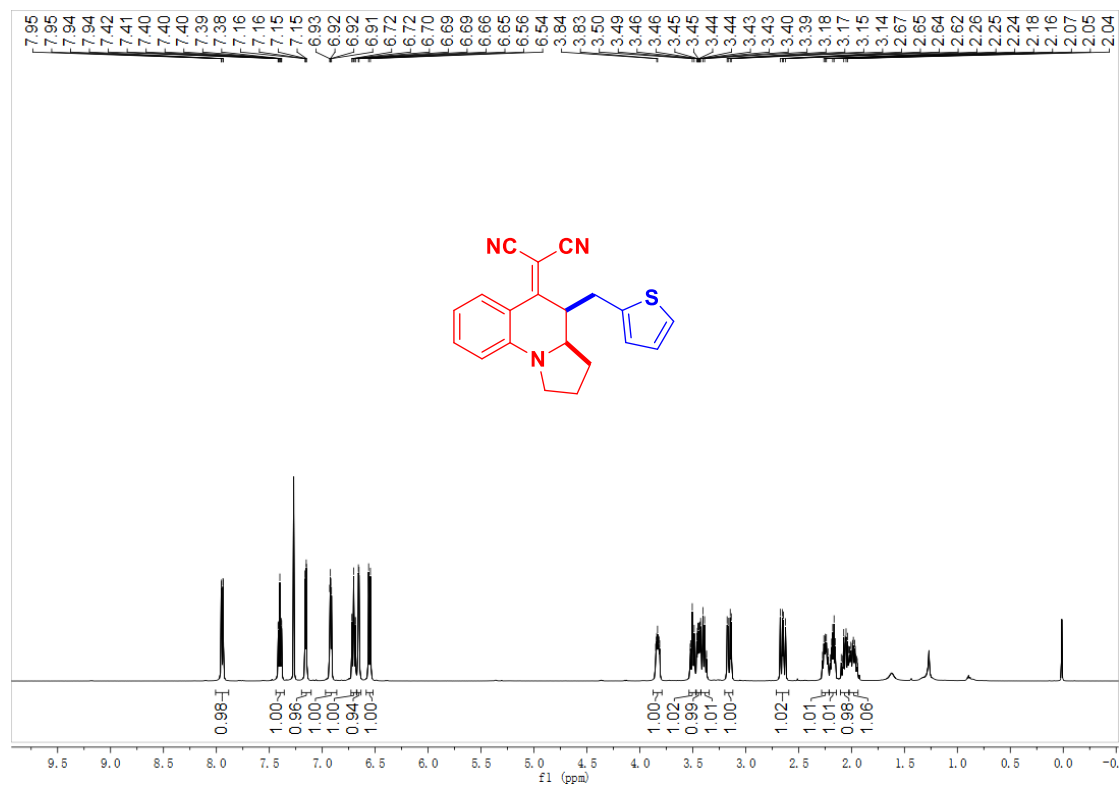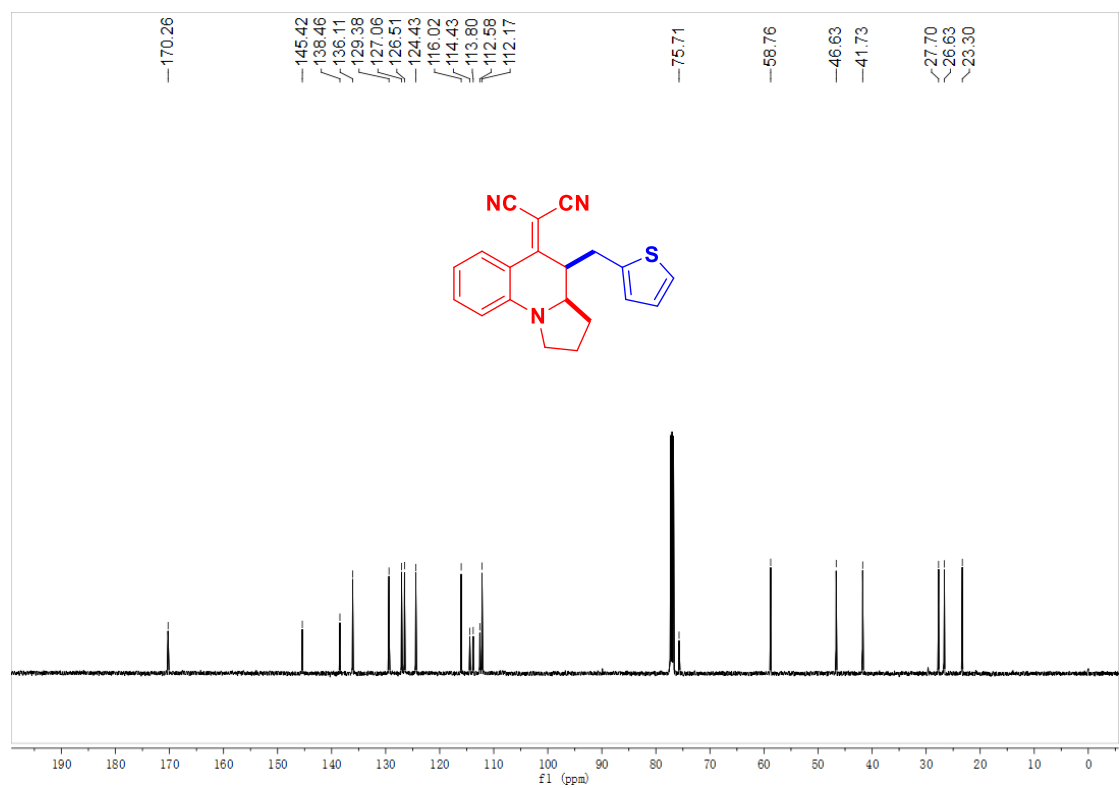

**2-((3a*R*,4*R*)-4-(pyridin-2-ylmethyl)-2,3,3a,4-tetrahydropyrrolo[1,2-*α*]quinolin-5(1*H*)-ylidene)malononitrile 5f**

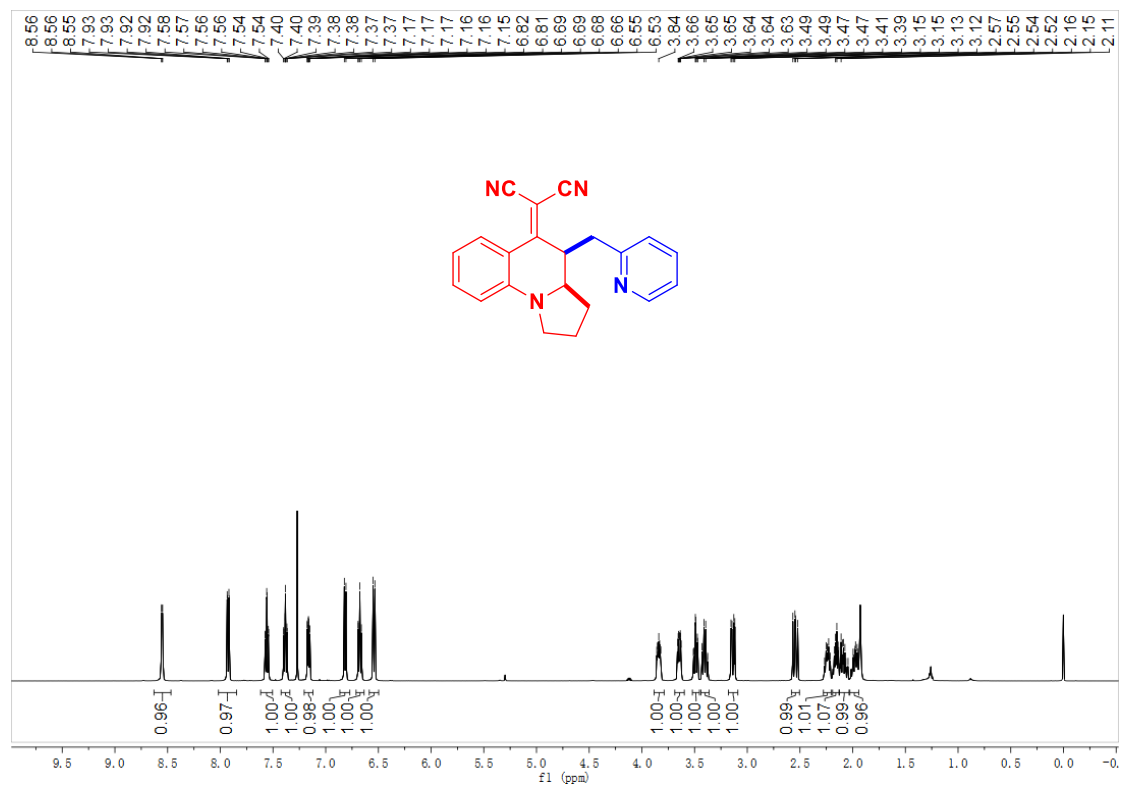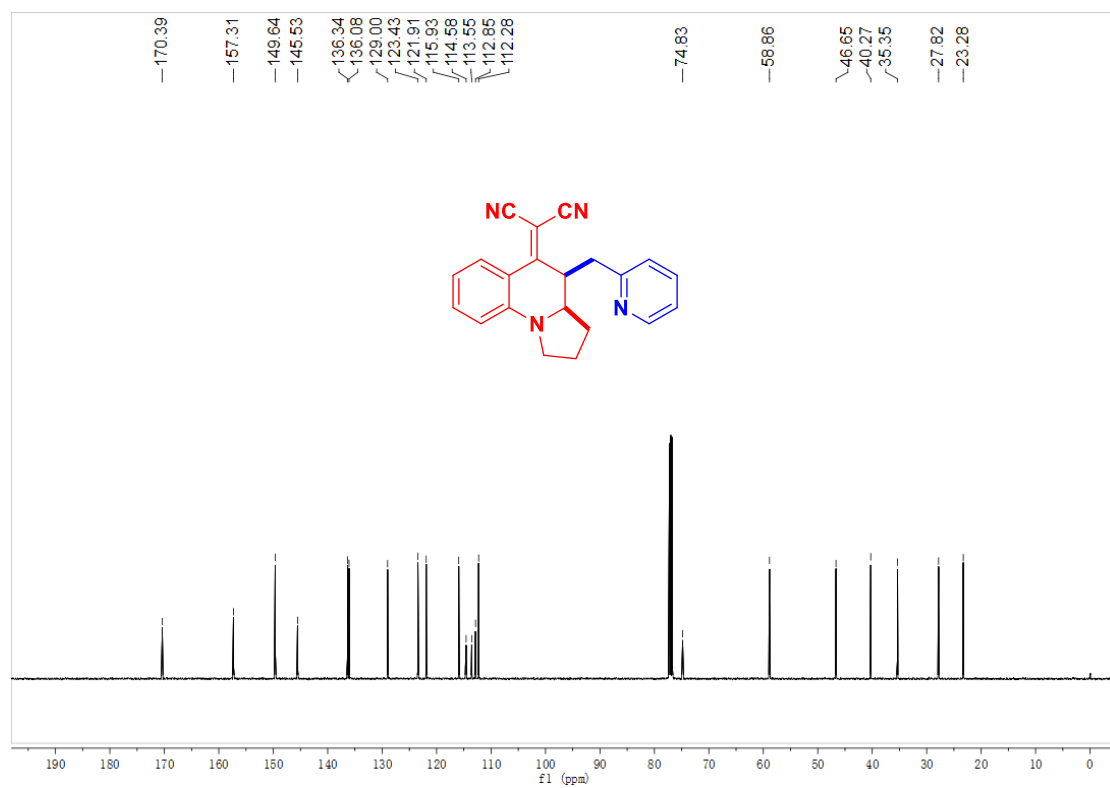

**2-((3*aR*,4*R*)-4-(pyridin-3-ylmethyl)-2,3,3*a*,4-tetrahydropyrrolo[1,2-*a*]quinolin-5(1*H*)-ylidene)malononitrile 5g**

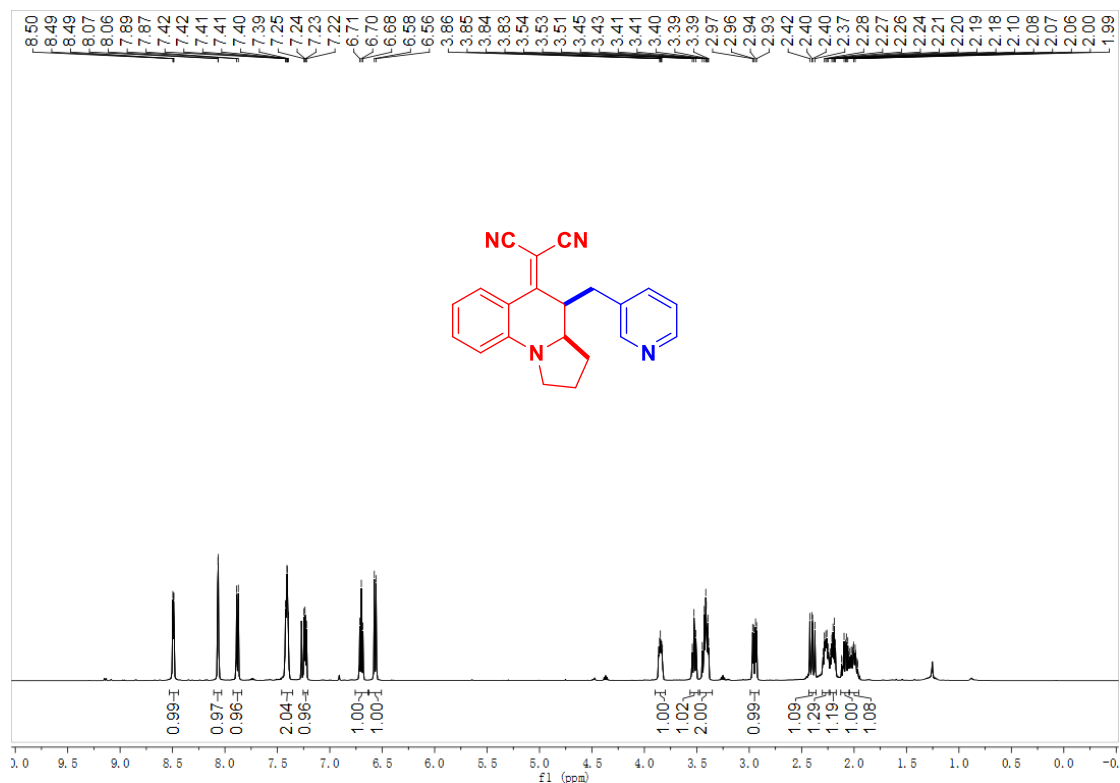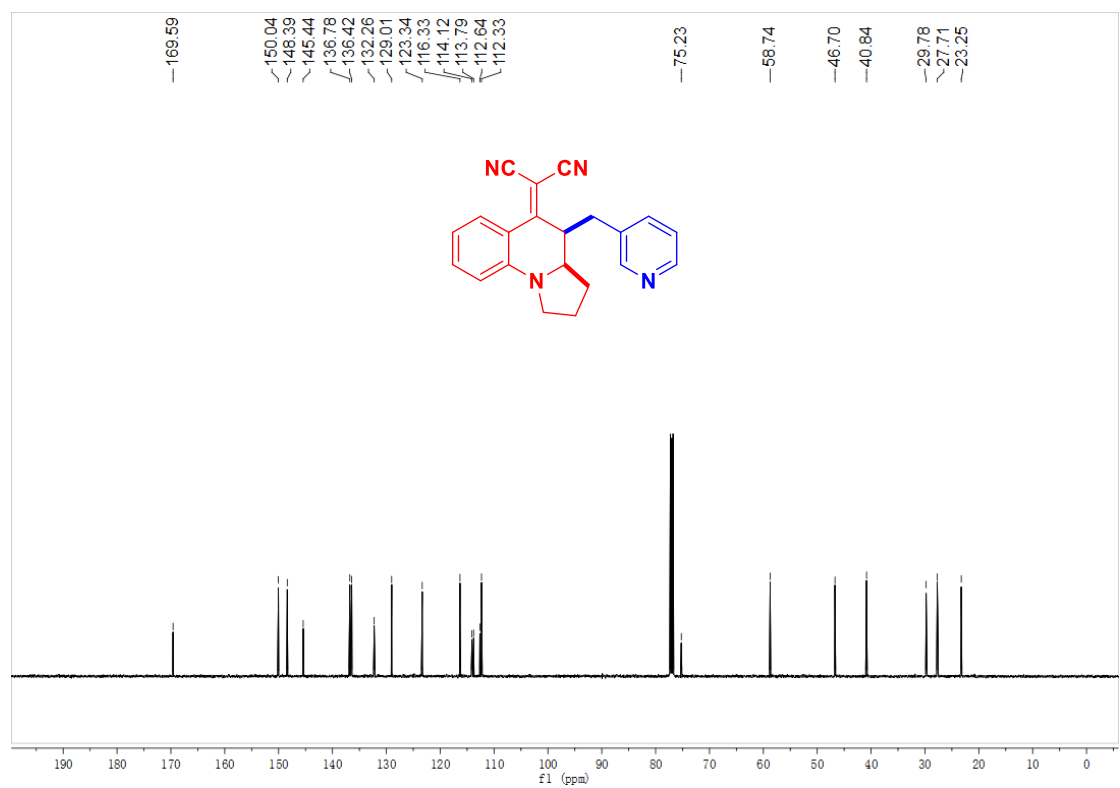

2-(4-(thiazol-2-ylmethyl)-2,3,3a,4-tetrahydropyrrolo[1,2- $\alpha$ ]quinolin-5(1H)-ylidene)malononitrile  
5h

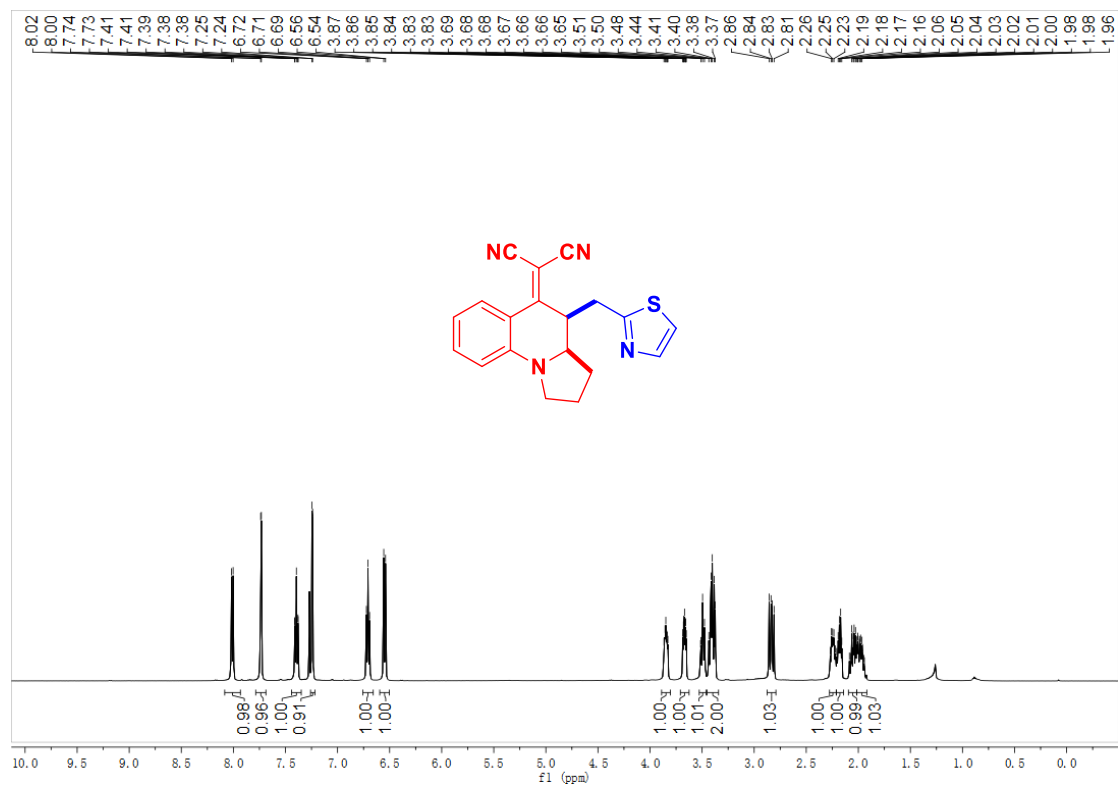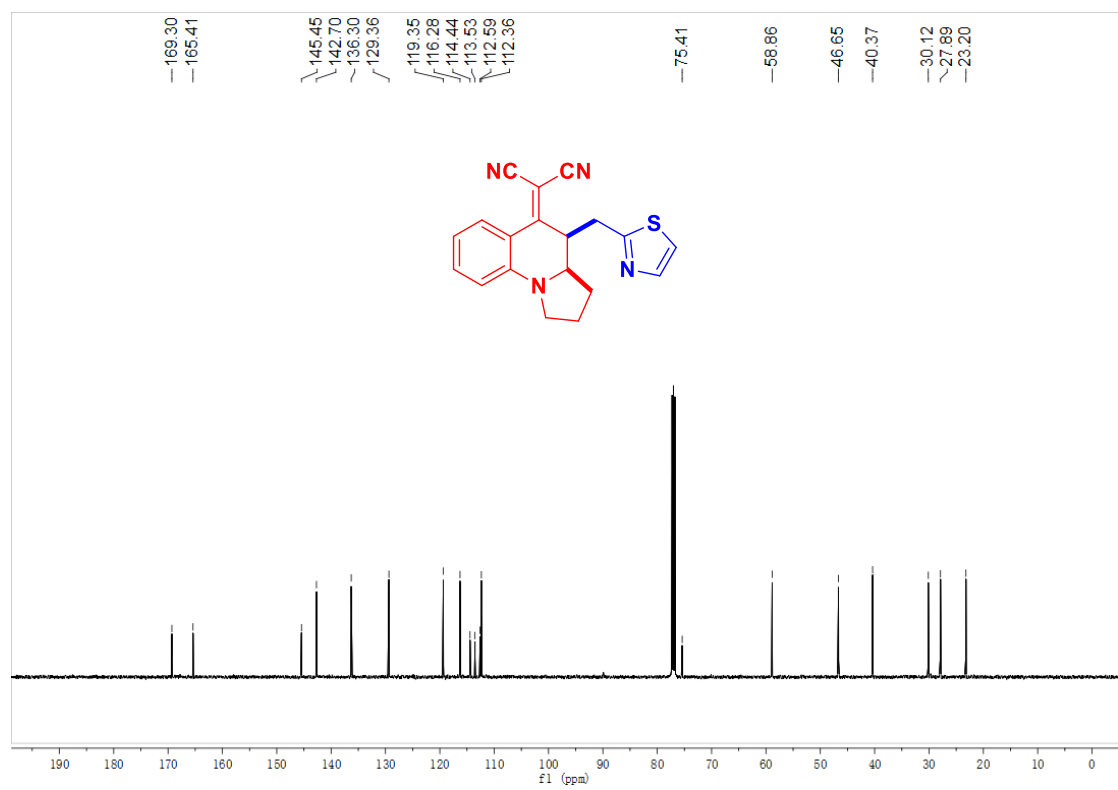

**2-((3*aR*,4*R*)-4-(cyclohex-3-en-1-ylmethyl)-2,3,3*a*,4-tetrahydropyrrolo[1,2-*a*]quinolin-5(1*H*)-ylidene)malononitrile 5i**

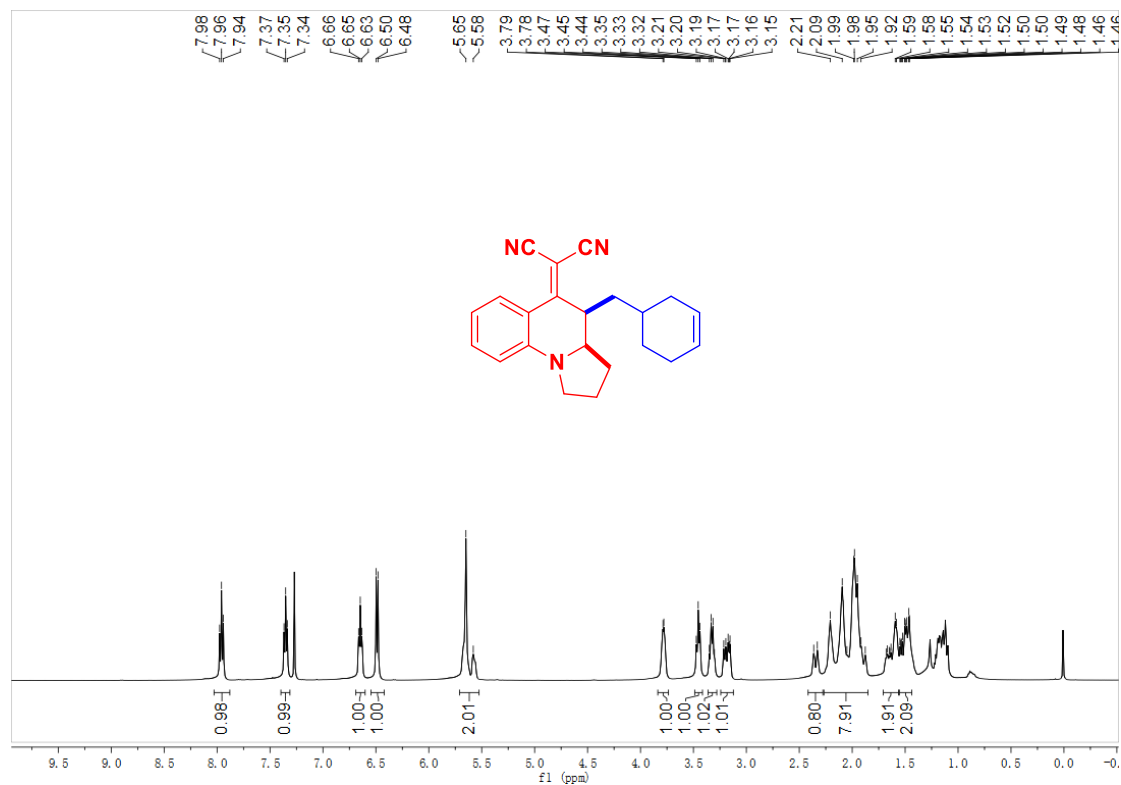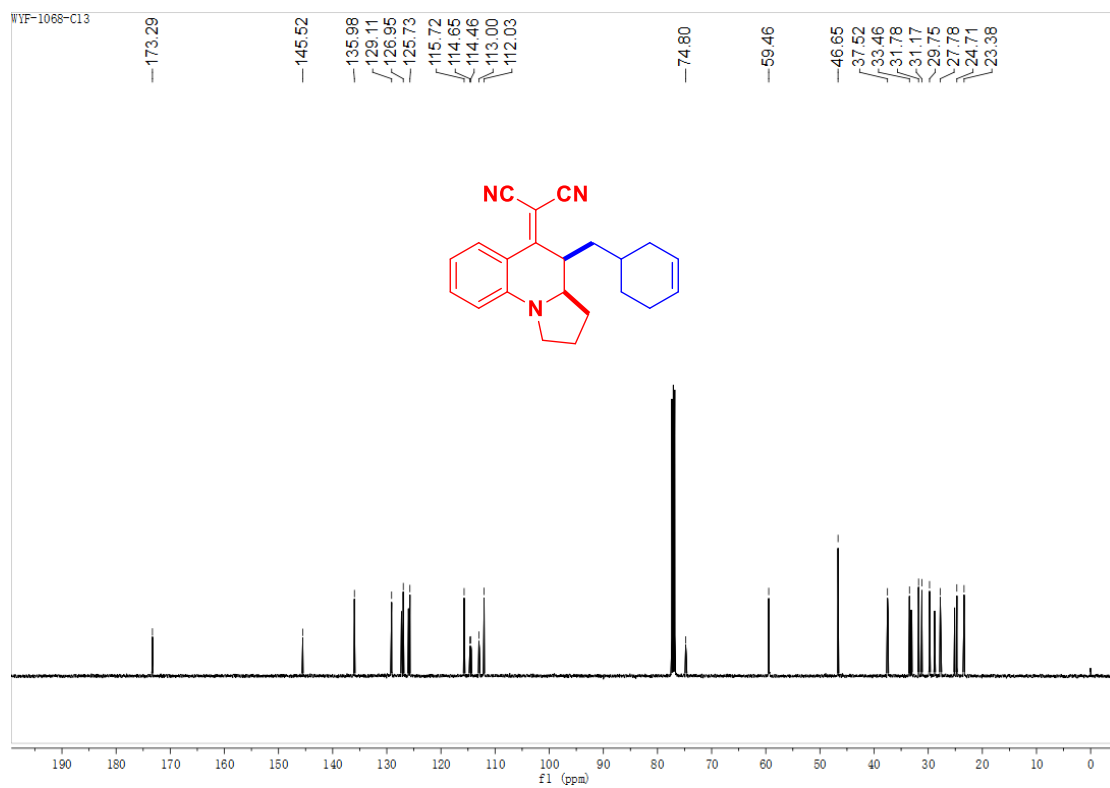



Ethyl 2-((3*R*,4*R*)-5-(dicyanomethylene)-1,2,3,3*a*,4,5-hexahydropyrrolo[1,2-*a*]quinolin-4-yl)acetate **5j**

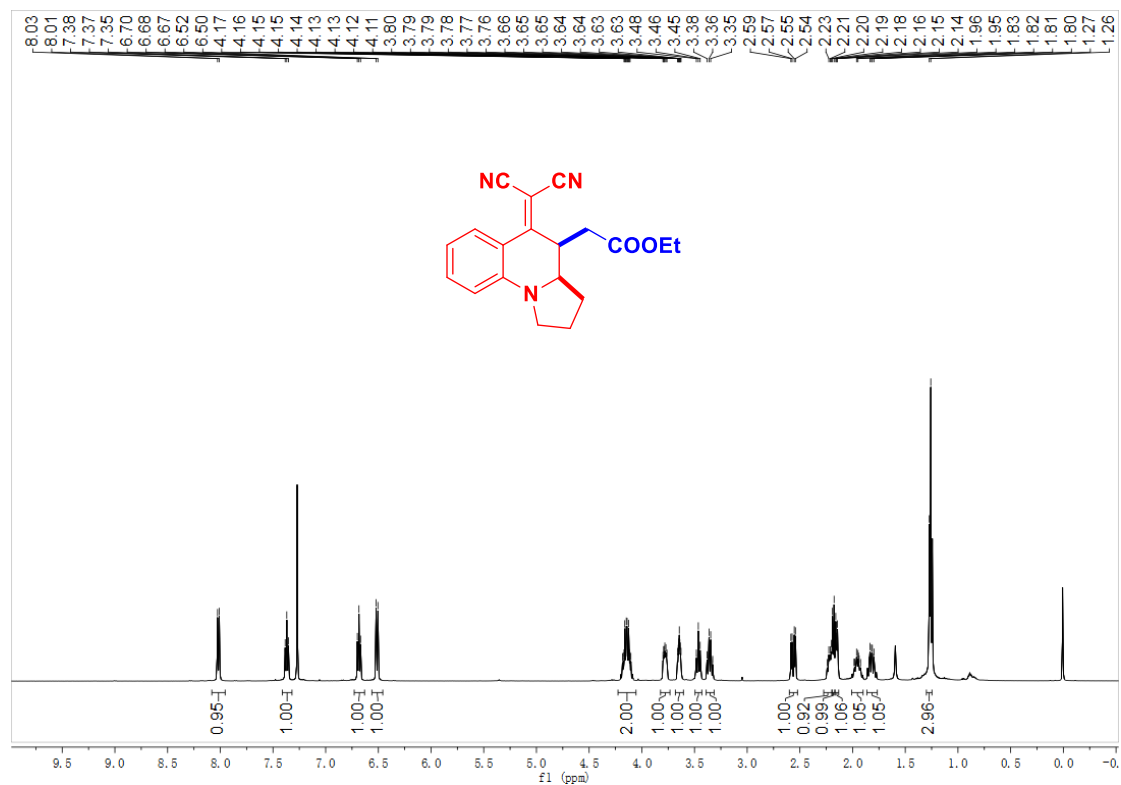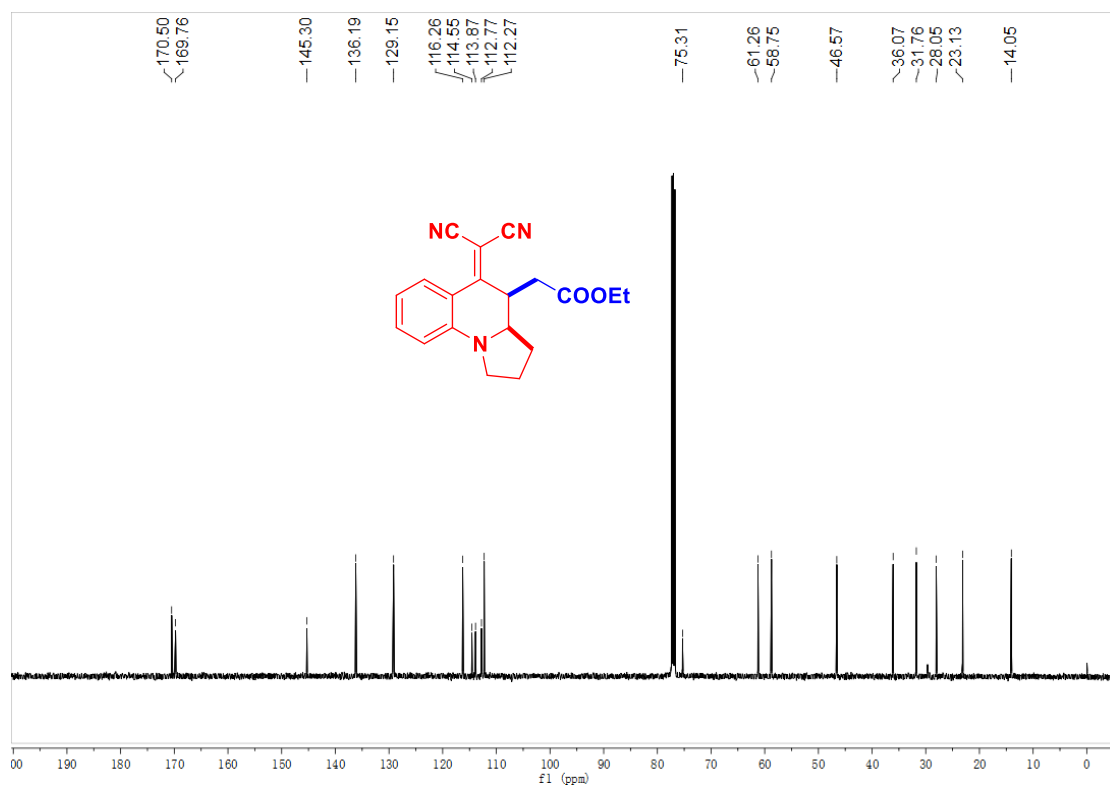

2-((3a*R*,4*R*)-4-methyl-2,3,3a,4-tetrahydropyrrolo[1,2-*a*]quinolin-5(1*H*)-ylidene)malononitrile **5k**

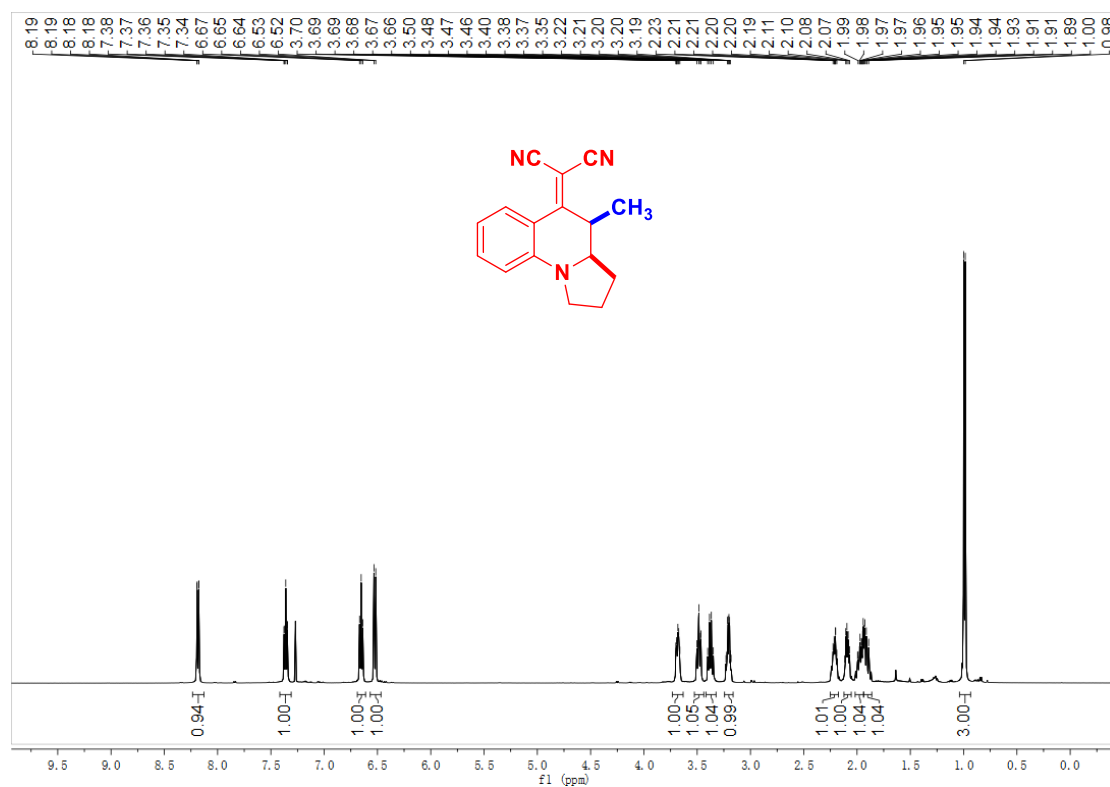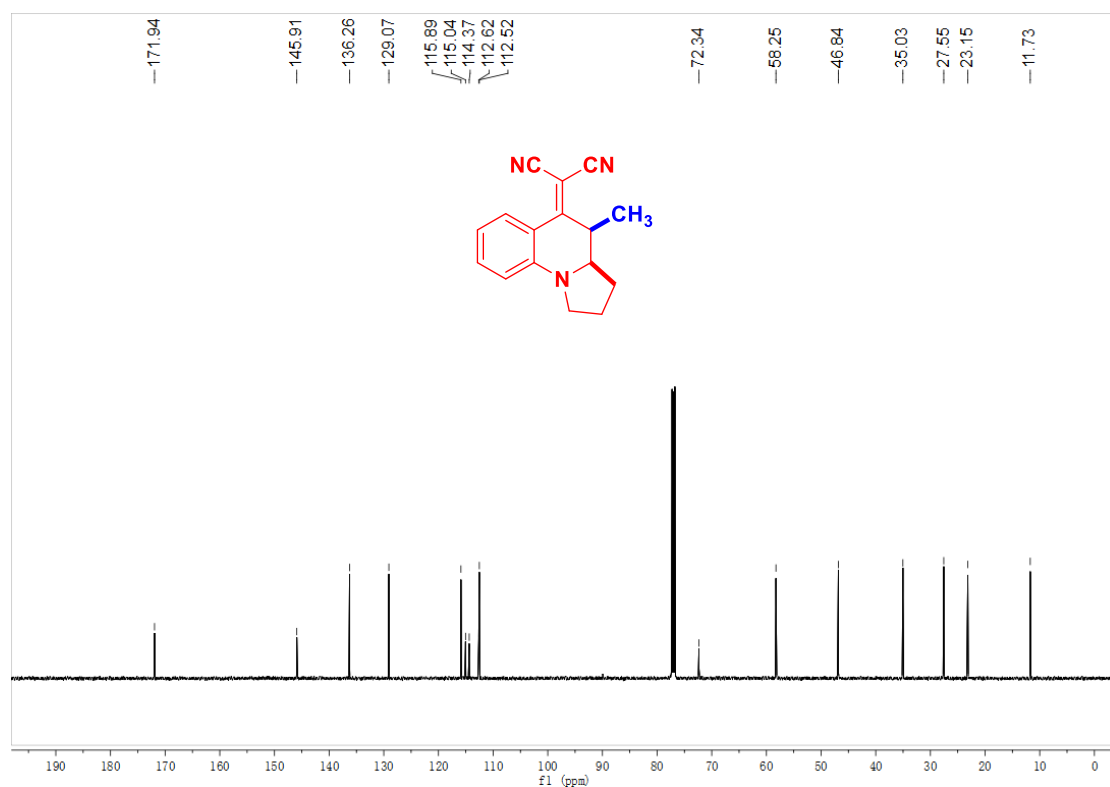

2-((2*S*,3*R*)-1-benzyl-3-methyl-2-phenyl-2,3-dihydroquinolin-4(1*H*)-ylidene)malononitrile **51**

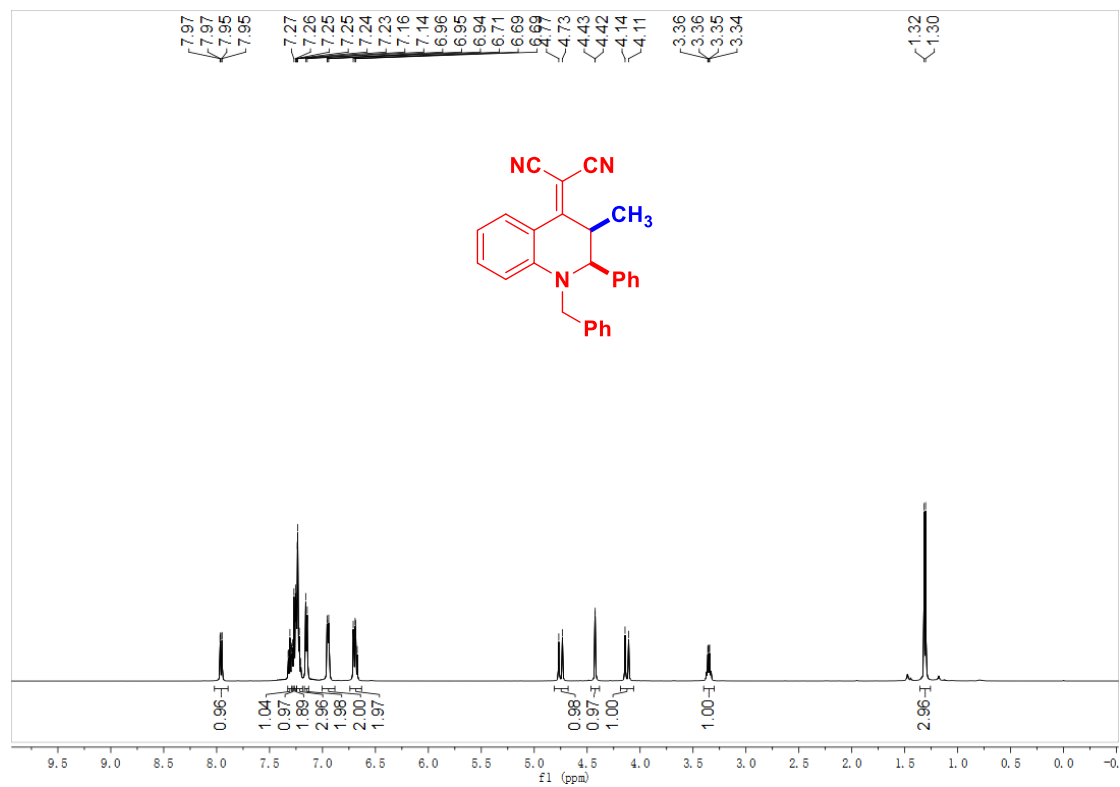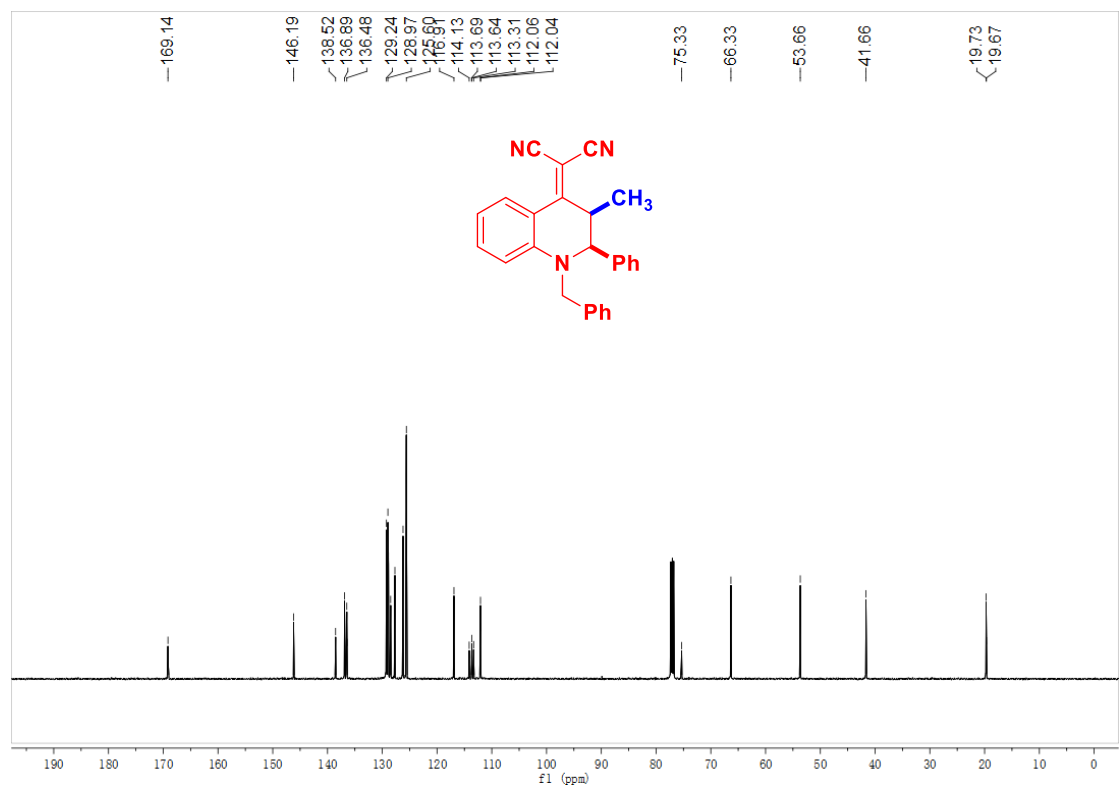

2-((6*R*,6*aR*,6*bS*)-6-methyl-6*a*,6*b*,7,8,9,10,10*a*,11-octahydroisindolo[2,1-*a*]quinolin-5(6*H*)-ylidene)malononitrile 5m

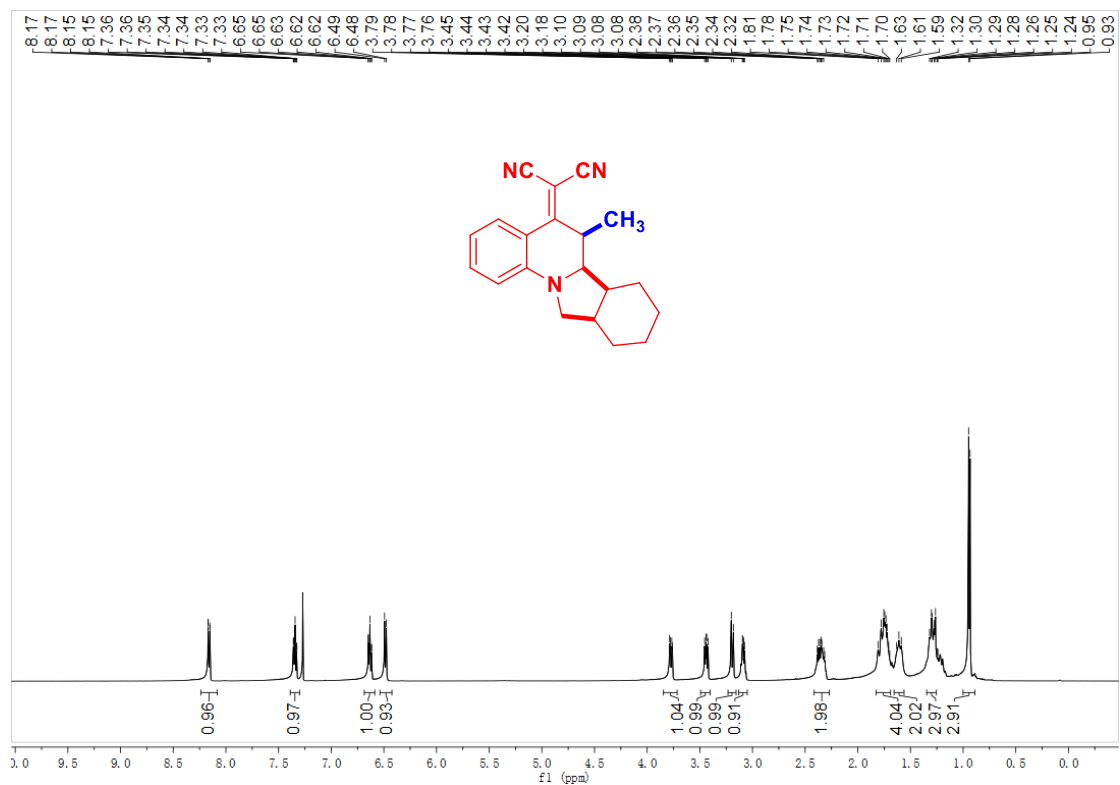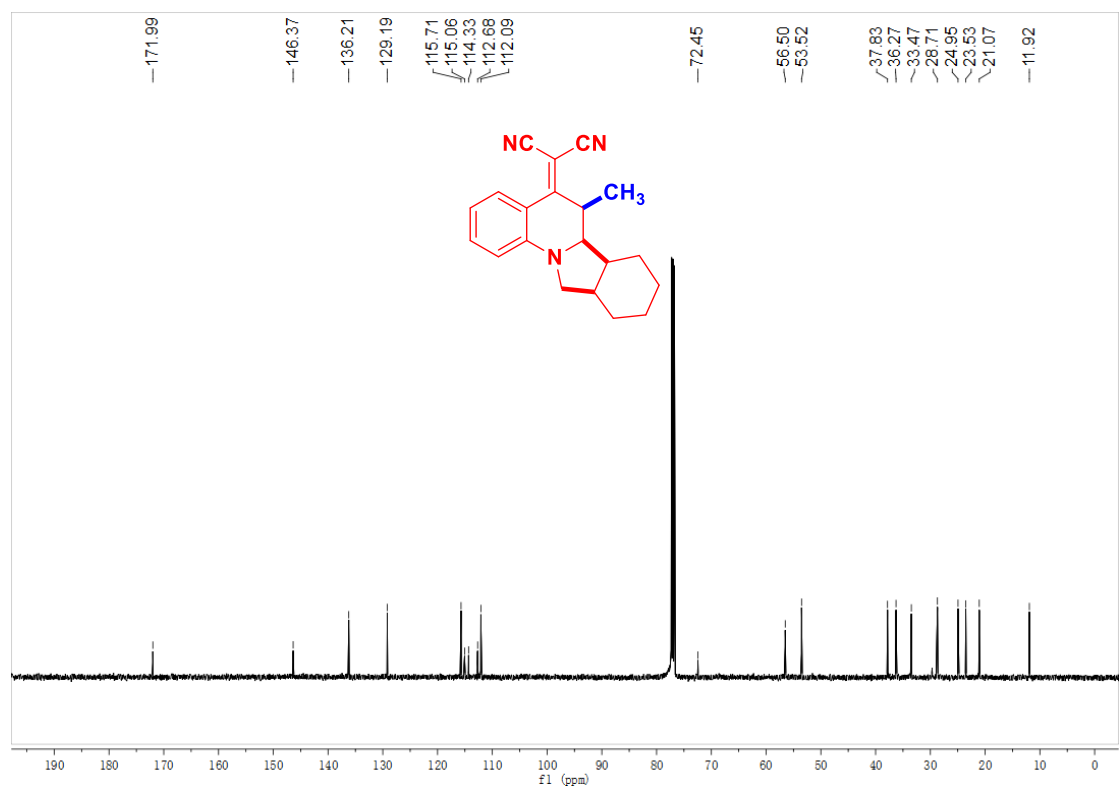

2-((3a*R*,4*R*)-4-ethyl-2,3,3a,4-tetrahydropyrrolo[1,2-*a*]quinolin-5(1*H*)-ylidene)malononitrile 5n

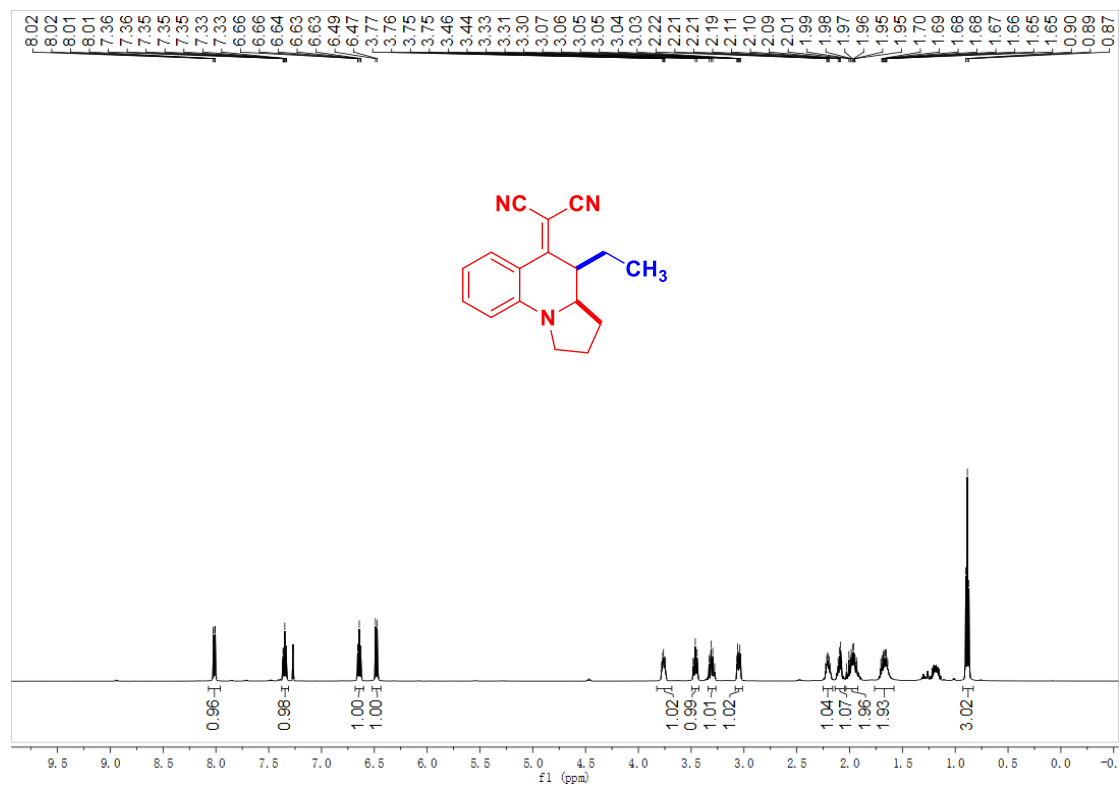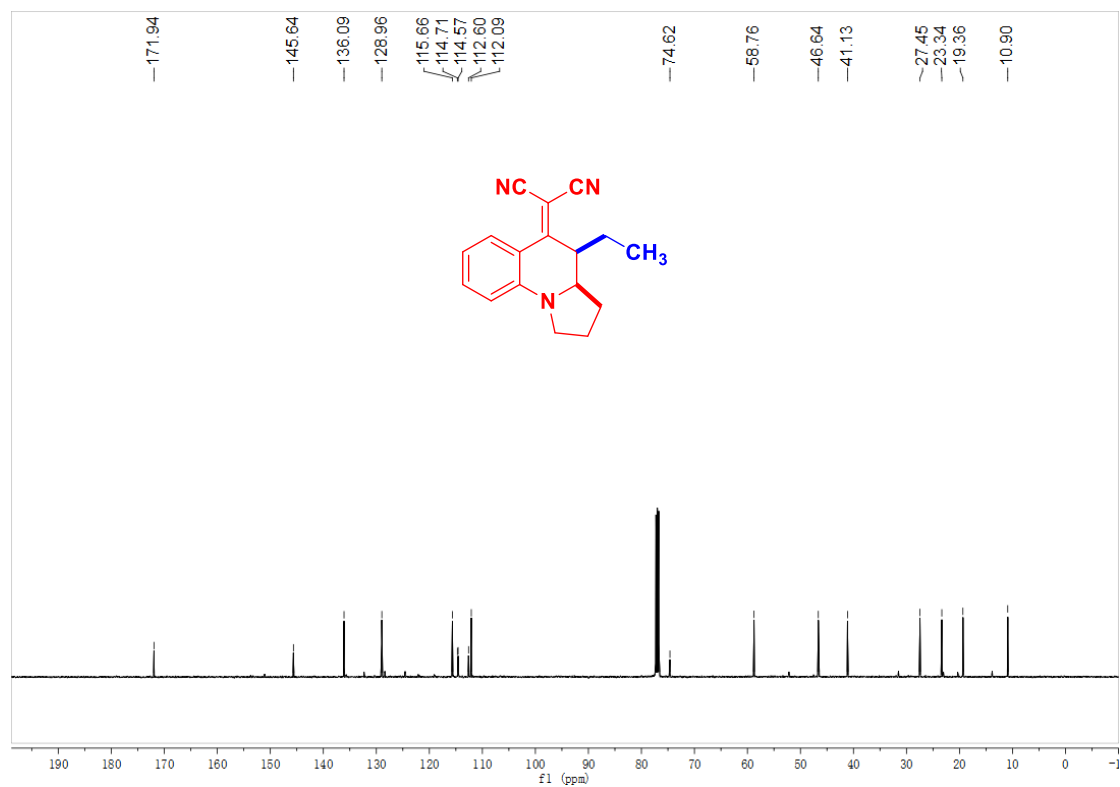

Supplement: d3ob00223c1.pdf [file d3ob00223c1.pdf]
